# Supplementary material for: Genetic Interaction Maps in Escherichia coli Reveal Functional Crosstalk among Cell Envelope Biogenesis Pathways
Source: PubMed Central journal article supplement (PMC3219608; doi:10.1371/journal.pgen.1002377), 2011-11-17
Supplement: pgen.1002377.s016.pdf [file pgen.1002377.s016.pdf]

## **Protocol S9. Immunoprecipitation**

The immunoprecipitation experiment was performed with an endogenously non-overproduced Kan marked SPA-tagged strain expressed in DY330 and with a Cm marked over-expressed His<sub>6</sub> tagged protein. One µl of the over expression plasmid (pCA24N) containing the full length His-tagged protein was transformed into the SPA-tagged strain. The transformants were selected on kanamycin (50 µg/ml) and chloramphenicol (34 µg/ml). The overnight *E. coli* DY330 strain harboring a SPA-tagged strain and a pCA24N plasmid containing the full length his-tag protein were grown at 25 °C in 50 ml terrific liquid broth containing kanamycin and chloramphenicol until it reaches OD<sub>600</sub> ~ 0.6. The cells were centrifuged at 4,000 *xg* for 20 min and the pellets were resuspended in 50 ml of terrific liquid broth with appropriate antibiotics, followed by IPTG induction. The cells were induced for 3 h at 25 °C after the addition of 0.5 mM IPTG and harvested by centrifugation once again at 4,000 *xg*. Cells were then lysed *via* sonication essentially as previously described[1]. The immunoprecipitation was subsequently performed by incubating the sonicated cell lysates of DY330 strain expressing the SPA-tag strains in the presence ITPG as well as with 1% triton detergent for 3 hrs at 4°C with anti-Flag M2 agarose beads.

The immunoprecipitated proteins were finally separated on 10% SDS/PAGE and transferred onto nitrocellulose membranes as previously described[1]. The membranes were probed with polyclonal (LptD, OmpA, LamB, DegP) or monoclonal (MBP, LPS, His epitopes) antisera, and visualized by chemiluminescence (Pierce).

## **References:**

1. Babu M, Butland G, Pogoutse O, Li J, Greenblatt JF, et al. (2009) Sequential peptide affinity purification system for the systematic isolation and identification of protein complexes from *Escherichia coli*. *Methods Mol Biol* 564: 373-400.
