# Supplementary material for: Genetic Interaction Maps in Escherichia coli Reveal Functional Crosstalk among Cell Envelope Biogenesis Pathways
Source: PLoS Genet. 2011 Nov 17;7(11):e1002377. doi: 10.1371/journal.pgen.1002377 (PMC3219608; doi:10.1371/journal.pgen.1002377)
Supplement: Table S4 — Genes from the rich medium screens with single or multiple annotated functions showing synthetic lethal interactions. (XLSX) [file pgen.1002377.s023.xlsx]

## Sheet: minus20genes
Table S4. Genes from the rich medium screens with single or multiple annotated functions showing synthetic lethal interactions
Gene1	Gene 2	Gene 1 Categorya	Gene 2 Category
yhjD__b3522__JW3490	fcl__b2052__JW2037	SFb_UNCERTAIN	SF_UNCERTAIN
oxyS__b4458__UNKW3110	fcl__b2052__JW2037	SF_UNCERTAIN	SF_UNCERTAIN
ddlB__b0092__JW0090	fcl__b2052__JW2037	SF_CORE	SF_UNCERTAIN
ybdA__b0591__JW0583	yaaU__b0045__JW0044	SF_CORE	SF_PREDICTED
ddlB__b0092__JW0090	yieG__b3714__JW3692	SF_CORE	SF_PREDICTED
sgrS__b4577__UNKW3110	yaaU__b0045__JW0044	SF_UNCERTAIN	SF_PREDICTED
ybdA__b0591__JW0583	fcl__b2052__JW2037	SF_CORE	SF_UNCERTAIN
fadD__b1805__JW1794	wbbI__b2034__JW2019	SF_CORE	SF_CORE
rybB__b4417__UNKW3110	yceG__b1097__JW1083	SF_UNCERTAIN	SF_PREDICTED
fliL__b1944__JW1928	ggt__b3447__JW3412	SF_UNCERTAIN	SF_UNCERTAIN
ddlB__b0092__JW0090	rlpA__b0633__JW0628	SF_CORE	SF_PREDICTED
sgrS__b4577__UNKW3110	caiE__b0035__JW5004	SF_UNCERTAIN	SF_UNCERTAIN
yaaJ__b0007__JW0006	yhcD__b3216__JW3183	SF_PREDICTED	SF_PREDICTED
ybdA__b0591__JW0583	cheZ__b1881__JW1870	SF_CORE	SF_UNCERTAIN
wzyE__b3793__JW3769	paaH__b1395__JW1390	MFc_CORE	SF_CORE
ybdA__b0591__JW0583	wbbK__b2032__JW2017	SF_CORE	SF_PREDICTED
wzb__b2061__JW2046	nlpB__b2477__JW2462	MF_CORE	SF_CORE
glpA__b2241__JW2235	panB__b0134__JW0130	SF_CORE	SF_CORE
fliL__b1944__JW1928	yeiB__b2152__JW2139	SF_UNCERTAIN	SF_PREDICTED
ybdA__b0591__JW0583	paaH__b1395__JW1390	SF_CORE	SF_CORE
fliL__b1944__JW1928	nlpB__b2477__JW2462	SF_UNCERTAIN	SF_CORE
glpD__b3426__JW3389	emrD__b3673__JW5634	SF_CORE	SF_UNCERTAIN
oxyS__b4458__UNKW3110	alr__b4053__JW4013	SF_UNCERTAIN	SF_CORE
fliL__b1944__JW1928	ydiY__b1722__JW1711	SF_UNCERTAIN	SF_PREDICTED
caiD__b0036__JW0035	yifL__b4558__JW3781	SF_UNCERTAIN	SF_PREDICTED
aaeA__b3241__JW3210	acpS__b2563__JW2547	SF_PREDICTED	SF_CORE
aaeA__b3241__JW3210	arcB__b3210__JW5536	SF_PREDICTED	SF_UNCERTAIN
aaeA__b3241__JW3210	chiA__b3338__JW3300	SF_PREDICTED	SF_UNCERTAIN
aaeA__b3241__JW3210	cydB__b0734__JW0723	SF_PREDICTED	SF_UNCERTAIN
aaeA__b3241__JW3210	cyoB__b0431__JW0421	SF_PREDICTED	SF_UNCERTAIN
aaeA__b3241__JW3210	dacB__b3182__JW3149	SF_PREDICTED	SF_CORE
aaeA__b3241__JW3210	damX__b3388__JW3351	SF_PREDICTED	SF_UNCERTAIN
aaeA__b3241__JW3210	fabI__b1288__JW1281	SF_PREDICTED	SF_CORE
aaeA__b3241__JW3210	fecB__b4290__JW4250	SF_PREDICTED	SF_UNCERTAIN
aaeA__b3241__JW3210	glpQ__b2239__JW2233	SF_PREDICTED	SF_CORE
aaeA__b3241__JW3210	gmd__b2053__JW2038	SF_PREDICTED	SF_CORE
aaeA__b3241__JW3210	gspA__b3323__JW3285	SF_PREDICTED	SF_UNCERTAIN
aaeA__b3241__JW3210	hflX__b4173__JW4131	SF_PREDICTED	SF_UNCERTAIN
aaeA__b3241__JW3210	htrL__b3618__JW5644	SF_PREDICTED	SF_UNCERTAIN
aaeA__b3241__JW3210	ispU__b0174__JW0169	SF_PREDICTED	MF_CORE
aaeA__b3241__JW3210	lpxC__b0096__JW0094	SF_PREDICTED	SF_CORE
aaeA__b3241__JW3210	lpxH__b0524__JW0513	SF_PREDICTED	SF_CORE
aaeA__b3241__JW3210	mdlB__b0449__JW5061	SF_PREDICTED	SF_UNCERTAIN
aaeA__b3241__JW3210	mipA__b1782__JW1771	SF_PREDICTED	SF_CORE
aaeA__b3241__JW3210	mscL__b3291__JW3252	SF_PREDICTED	SF_UNCERTAIN
aaeA__b3241__JW3210	mscS__b2924__JW2891	SF_PREDICTED	SF_UNCERTAIN
aaeA__b3241__JW3210	murA__b3189__JW3156	SF_PREDICTED	SF_CORE
aaeA__b3241__JW3210	ompC__b2215__JW2203	SF_PREDICTED	SF_CORE
aaeA__b3241__JW3210	paaH__b1395__JW1390	SF_PREDICTED	SF_CORE
aaeA__b3241__JW3210	paaK__b1398__JW5218	SF_PREDICTED	SF_CORE
aaeA__b3241__JW3210	pal__b0741__JW0731	SF_PREDICTED	SF_CORE
aaeA__b3241__JW3210	pldA__b3821__JW3794	SF_PREDICTED	MF_UNCERTAIN
aaeA__b3241__JW3210	pldB__b3825__JW5584	SF_PREDICTED	SF_CORE
aaeA__b3241__JW3210	rfaG__b3631__JW3606	SF_PREDICTED	SF_CORE
aaeA__b3241__JW3210	rfaJ__b3626__JW3601	SF_PREDICTED	SF_CORE
aaeA__b3241__JW3210	rffD__b3787__JW5599	SF_PREDICTED	SF_CORE
aaeA__b3241__JW3210	secY__b3300__JW3262	SF_PREDICTED	SF_CORE
aaeA__b3241__JW3210	spoT__b3650__JW3625	SF_PREDICTED	SF_UNCERTAIN
aaeA__b3241__JW3210	ybaW__b0443__JW0433	SF_PREDICTED	MF_UNCERTAIN
aaeA__b3241__JW3210	ybaY__b0453__JW0443	SF_PREDICTED	SF_PREDICTED
aaeA__b3241__JW3210	yceK__b1050__JW5151	SF_PREDICTED	SF_PREDICTED
aaeA__b3241__JW3210	ycjG__b1325__JW1318	SF_PREDICTED	SF_PREDICTED
aaeA__b3241__JW3210	ydcO__b1433__JW5229	SF_PREDICTED	SF_PREDICTED
aaeA__b3241__JW3210	yddA__b1496__JW5242	SF_PREDICTED	SF_UNCERTAIN
aaeA__b3241__JW3210	yegE__b2067__JW2052	SF_PREDICTED	SF_PREDICTED
aaeA__b3241__JW3210	yfdI__b2352__JW5382	SF_PREDICTED	SF_PREDICTED
aaeA__b3241__JW3210	yfdV__b2372__JW2369	SF_PREDICTED	SF_PREDICTED
aaeA__b3241__JW3210	yfeO__b2389__JW2386	SF_PREDICTED	SF_PREDICTED
aaeA__b3241__JW3210	yfiB__b2605__JW2586	SF_PREDICTED	SF_PREDICTED
aaeA__b3241__JW3210	yhgN__b3434__JW3397	SF_PREDICTED	SF_PREDICTED
aaeA__b3241__JW3210	yhhH__b3483__JW3449	SF_PREDICTED	SF_UNCERTAIN
aaeA__b3241__JW3210	yhjE__b3523__JW3491	SF_PREDICTED	SF_PREDICTED
aaeA__b3241__JW3210	yhjR__b3535__JW3503	SF_PREDICTED	SF_PREDICTED
aaeA__b3241__JW3210	yhjV__b3539__JW3508	SF_PREDICTED	SF_PREDICTED
aaeA__b3241__JW3210	yidB__b3698__JW3675	SF_PREDICTED	SF_PREDICTED
aaeA__b3241__JW3210	yidC__b3705__JW3683	SF_PREDICTED	SF_CORE
aaeA__b3241__JW3210	yihP__b3877__JW3848	SF_PREDICTED	SF_UNCERTAIN
aaeA__b3241__JW3210	yjbF__b4027__JW5711	SF_PREDICTED	SF_PREDICTED
aaeA__b3241__JW3210	yjcR__b4082__JW4043	SF_PREDICTED	SF_UNCERTAIN
aaeA__b3241__JW3210	yjeP__b4159__JW4120	SF_PREDICTED	SF_PREDICTED
aaeA__b3241__JW3210	yjgQ__b4262__JW5760	SF_PREDICTED	SF_CORE
aaeA__b3241__JW3210	yjhA__b4311__JW5778	SF_PREDICTED	SF_PREDICTED
aaeA__b3241__JW3210	yjiO__b4337__JW4300	SF_PREDICTED	SF_UNCERTAIN
aaeA__b3241__JW3210	yohG__b2138__JW5838	SF_PREDICTED	SF_UNCERTAIN
aaeA__b3241__JW3210	yqcE__b2775__JW2746	SF_PREDICTED	SF_PREDICTED
aaeA__b3241__JW3210	yrbB__b3191__JW5535	SF_PREDICTED	SF_CORE
aaeA__b3241__JW3210	ytfN__b4221__JW4180	SF_PREDICTED	SF_PREDICTED
aaeB__b3240__JW3209	ansB__b2957__JW2924	SF_PREDICTED	SF_UNCERTAIN
aaeB__b3240__JW3209	btuD__b1709__JW1699	SF_PREDICTED	SF_UNCERTAIN
aaeB__b3240__JW3209	coaD__b3634__JW3609	SF_PREDICTED	SF_CORE
aaeB__b3240__JW3209	dacB__b3182__JW3149	SF_PREDICTED	SF_CORE
aaeB__b3240__JW3209	dsbG__b0604__JW0597	SF_PREDICTED	SF_CORE
aaeB__b3240__JW3209	fabH__b1091__JW1077	SF_PREDICTED	SF_CORE
aaeB__b3240__JW3209	fcl__b2052__JW2037	SF_PREDICTED	SF_UNCERTAIN
aaeB__b3240__JW3209	ftsE__b3463__JW3428	SF_PREDICTED	SF_CORE
aaeB__b3240__JW3209	galF__b2042__JW2027	SF_PREDICTED	MF_CORE
aaeB__b3240__JW3209	ggt__b3447__JW3412	SF_PREDICTED	SF_UNCERTAIN
aaeB__b3240__JW3209	glmS__b3729__JW3707	SF_PREDICTED	MF_CORE
aaeB__b3240__JW3209	glpQ__b2239__JW2233	SF_PREDICTED	SF_CORE
aaeB__b3240__JW3209	glpT__b2240__JW2234	SF_PREDICTED	SF_CORE
aaeB__b3240__JW3209	gspH__b3329__JW3291	SF_PREDICTED	SF_UNCERTAIN
aaeB__b3240__JW3209	gspK__b3332__JW3294	SF_PREDICTED	SF_UNCERTAIN
aaeB__b3240__JW3209	gspM__b3334__JW5704	SF_PREDICTED	SF_UNCERTAIN
aaeB__b3240__JW3209	hemY__b3802__JW3774	SF_PREDICTED	SF_UNCERTAIN
aaeB__b3240__JW3209	hlpA__b0178__JW0173	SF_PREDICTED	MF_CORE
aaeB__b3240__JW3209	lepA__b2569__JW2553	SF_PREDICTED	SF_UNCERTAIN
aaeB__b3240__JW3209	mdtE__b3513__JW3481	SF_PREDICTED	SF_UNCERTAIN
aaeB__b3240__JW3209	mdtI__b1599__JW1591	SF_PREDICTED	SF_UNCERTAIN
aaeB__b3240__JW3209	minD__b1175__JW1164	SF_PREDICTED	SF_CORE
aaeB__b3240__JW3209	mscL__b3291__JW3252	SF_PREDICTED	SF_UNCERTAIN
aaeB__b3240__JW3209	murF__b0086__JW0084	SF_PREDICTED	SF_CORE
aaeB__b3240__JW3209	napD__b2207__JW2195	SF_PREDICTED	SF_UNCERTAIN
aaeB__b3240__JW3209	nfrA__b0568__JW0557	SF_PREDICTED	SF_UNCERTAIN
aaeB__b3240__JW3209	paaE__b1392__JW1387	SF_PREDICTED	SF_CORE
aaeB__b3240__JW3209	pbpC__b2519__JW2503	SF_PREDICTED	SF_CORE
aaeB__b3240__JW3209	pgsA__b1912__JW1897	SF_PREDICTED	SF_CORE
aaeB__b3240__JW3209	pldB__b3825__JW5584	SF_PREDICTED	SF_CORE
aaeB__b3240__JW3209	plsC__b3018__JW2986	SF_PREDICTED	SF_CORE
aaeB__b3240__JW3209	rfaB__b3628__JW3603	SF_PREDICTED	SF_CORE
aaeB__b3240__JW3209	rfaG__b3631__JW3606	SF_PREDICTED	SF_CORE
aaeB__b3240__JW3209	rfaJ__b3626__JW3601	SF_PREDICTED	SF_CORE
aaeB__b3240__JW3209	rfaS__b3629__JW3604	SF_PREDICTED	SF_UNCERTAIN
aaeB__b3240__JW3209	rffH__b3789__JW3763	SF_PREDICTED	SF_CORE
aaeB__b3240__JW3209	sohA__b3129__JW3098	SF_PREDICTED	SF_UNCERTAIN
aaeB__b3240__JW3209	spoT__b3650__JW3625	SF_PREDICTED	SF_UNCERTAIN
aaeB__b3240__JW3209	sugE__b4148__JW5738	SF_PREDICTED	SF_UNCERTAIN
aaeB__b3240__JW3209	sulA__b0958__JW0941	SF_PREDICTED	SF_CORE
aaeB__b3240__JW3209	tolR__b0738__JW0728	SF_PREDICTED	SF_CORE
aaeB__b3240__JW3209	tonB__b1252__JW5195	SF_PREDICTED	SF_CORE
aaeB__b3240__JW3209	tsx__b0411__JW0401	SF_PREDICTED	SF_UNCERTAIN
aaeB__b3240__JW3209	ugd__b2028__JW2010	SF_PREDICTED	MF_CORE
aaeB__b3240__JW3209	ugpA__b3452__JW3417	SF_PREDICTED	SF_CORE
aaeB__b3240__JW3209	ugpC__b3450__JW3415	SF_PREDICTED	SF_CORE
aaeB__b3240__JW3209	ugpE__b3451__JW3416	SF_PREDICTED	SF_CORE
aaeB__b3240__JW3209	wbbK__b2032__JW2017	SF_PREDICTED	SF_PREDICTED
aaeB__b3240__JW3209	wcaF__b2054__JW2039	SF_PREDICTED	SF_UNCERTAIN
aaeB__b3240__JW3209	wcaL__b2044__JW2029	SF_PREDICTED	SF_UNCERTAIN
aaeB__b3240__JW3209	wzxE__b3792__JW3766	SF_PREDICTED	MF_CORE
aaeB__b3240__JW3209	yaaU__b0045__JW0044	SF_PREDICTED	SF_PREDICTED
aaeB__b3240__JW3209	yaeT__b0177__JW0172	SF_PREDICTED	SF_CORE
aaeB__b3240__JW3209	yagX__b0291__JW0285	SF_PREDICTED	SF_PREDICTED
aaeB__b3240__JW3209	yaiS__b0364__JW0356	SF_PREDICTED	SF_PREDICTED
aaeB__b3240__JW3209	yaiT__b0371__JW0362	SF_PREDICTED	SF_PREDICTED
aaeB__b3240__JW3209	yajG__b0434__JW0424	SF_PREDICTED	SF_PREDICTED
aaeB__b3240__JW3209	yajR__b0427__JW5059	SF_PREDICTED	SF_PREDICTED
aaeB__b3240__JW3209	ybbW__b0511__JW0499	SF_PREDICTED	SF_PREDICTED
aaeB__b3240__JW3209	ycdQ__b1022__JW1007	SF_PREDICTED	SF_UNCERTAIN
aaeB__b3240__JW3209	yceK__b1050__JW5151	SF_PREDICTED	SF_PREDICTED
aaeB__b3240__JW3209	yddA__b1496__JW5242	SF_PREDICTED	SF_UNCERTAIN
aaeB__b3240__JW3209	ydeA__b1528__JW1521	SF_PREDICTED	SF_PREDICTED
aaeB__b3240__JW3209	ydgI__b1605__JW1597	SF_PREDICTED	SF_PREDICTED
aaeB__b3240__JW3209	ydhK__b1645__JW1637	SF_PREDICTED	SF_PREDICTED
aaeB__b3240__JW3209	ydiY__b1722__JW1711	SF_PREDICTED	SF_PREDICTED
aaeB__b3240__JW3209	ydjE__b1769__JW1758	SF_PREDICTED	SF_PREDICTED
aaeB__b3240__JW3209	ydjN__b1729__JW1718	SF_PREDICTED	SF_PREDICTED
aaeB__b3240__JW3209	yedE__b1929__JW1914	SF_PREDICTED	SF_PREDICTED
aaeB__b3240__JW3209	yfaW__b2247__JW2241	SF_PREDICTED	SF_UNCERTAIN
aaeB__b3240__JW3209	yfbG__b2255__JW2249	SF_PREDICTED	SF_CORE
aaeB__b3240__JW3209	yfbS__b2292__JW2289	SF_PREDICTED	SF_PREDICTED
aaeB__b3240__JW3209	yfeH__b2410__JW5876	SF_PREDICTED	SF_PREDICTED
aaeB__b3240__JW3209	yfeO__b2389__JW2386	SF_PREDICTED	SF_PREDICTED
aaeB__b3240__JW3209	yfgH__b2505__JW5400	SF_PREDICTED	SF_PREDICTED
aaeB__b3240__JW3209	yfgL__b2512__JW2496	SF_PREDICTED	SF_CORE
aaeB__b3240__JW3209	yfhM__b2520__JW2504	SF_PREDICTED	MF_PREDICTED
aaeB__b3240__JW3209	yhbN__b3200__JW3167	SF_PREDICTED	SF_CORE
aaeB__b3240__JW3209	yhgE__b3402__JW3365	SF_PREDICTED	SF_PREDICTED
aaeB__b3240__JW3209	yhgN__b3434__JW3397	SF_PREDICTED	SF_PREDICTED
aaeB__b3240__JW3209	yhjE__b3523__JW3491	SF_PREDICTED	SF_PREDICTED
aaeB__b3240__JW3209	yhjY__b3548__JW5659	SF_PREDICTED	SF_PREDICTED
aaeB__b3240__JW3209	yicJ__b3657__JW5939	SF_PREDICTED	SF_PREDICTED
aaeB__b3240__JW3209	yidC__b3705__JW3683	SF_PREDICTED	SF_CORE
aaeB__b3240__JW3209	yieG__b3714__JW3692	SF_PREDICTED	SF_PREDICTED
aaeB__b3240__JW3209	yifK__b3795__JW5595	SF_PREDICTED	SF_PREDICTED
aaeB__b3240__JW3209	yjcD__b4064__JW4025	SF_PREDICTED	SF_PREDICTED
aaeB__b3240__JW3209	yjcE__b4065__JW4026	SF_PREDICTED	SF_UNCERTAIN
aaeB__b3240__JW3209	yjcR__b4082__JW4043	SF_PREDICTED	SF_UNCERTAIN
aaeB__b3240__JW3209	yjdL__b4130__JW4091	SF_PREDICTED	SF_PREDICTED
aaeB__b3240__JW3209	yjeM__b4156__JW5739	SF_PREDICTED	SF_PREDICTED
aaeB__b3240__JW3209	yjeP__b4159__JW4120	SF_PREDICTED	SF_PREDICTED
aaeB__b3240__JW3209	yjhA__b4311__JW5778	SF_PREDICTED	SF_PREDICTED
aaeB__b3240__JW3209	yjhB__b4279__JW5768	SF_PREDICTED	SF_PREDICTED
aaeB__b3240__JW3209	yjiJ__b4332__JW4295	SF_PREDICTED	SF_PREDICTED
aaeB__b3240__JW3209	yjiZ__b4356__JW4319	SF_PREDICTED	SF_PREDICTED
aaeB__b3240__JW3209	yojI__b2211__JW2199	SF_PREDICTED	SF_UNCERTAIN
aaeB__b3240__JW3209	ytfF__b4210__JW4168	SF_PREDICTED	SF_PREDICTED
aaeB__b3240__JW3209	ytfN__b4221__JW4180	SF_PREDICTED	SF_PREDICTED
accA__b0185__JW0180	damX__b3388__JW3351	SF_CORE	SF_UNCERTAIN
accA__b0185__JW0180	dppD__b3541__JW3510	SF_CORE	SF_CORE
accA__b0185__JW0180	gspG__b3328__JW3290	SF_CORE	SF_UNCERTAIN
accA__b0185__JW0180	hflX__b4173__JW4131	SF_CORE	SF_UNCERTAIN
accA__b0185__JW0180	iscS__b2530__JW2514	SF_CORE	SF_UNCERTAIN
accA__b0185__JW0180	mscS__b2924__JW2891	SF_CORE	SF_UNCERTAIN
accA__b0185__JW0180	nanK__b3222__JW5538	SF_CORE	SF_UNCERTAIN
accA__b0185__JW0180	oppB__b1244__JW1236	SF_CORE	MF_CORE
accA__b0185__JW0180	paaH__b1395__JW1390	SF_CORE	SF_CORE
accA__b0185__JW0180	rfaY__b3625__JW3600	SF_CORE	SF_CORE
accA__b0185__JW0180	rffM__b3794__JW3770	SF_CORE	SF_CORE
accA__b0185__JW0180	trg__b1421__JW1417	SF_CORE	SF_UNCERTAIN
accA__b0185__JW0180	uidC__b1615__JW1607	SF_CORE	SF_PREDICTED
accA__b0185__JW0180	ydcO__b1433__JW5229	SF_CORE	SF_PREDICTED
accA__b0185__JW0180	ydgI__b1605__JW1597	SF_CORE	SF_PREDICTED
accA__b0185__JW0180	yfeO__b2389__JW2386	SF_CORE	SF_PREDICTED
accA__b0185__JW0180	ygfU__b2888__JW5470	SF_CORE	SF_PREDICTED
accA__b0185__JW0180	yhjE__b3523__JW3491	SF_CORE	SF_PREDICTED
accA__b0185__JW0180	yhjV__b3539__JW3508	SF_CORE	SF_PREDICTED
accA__b0185__JW0180	yibH__b3597__JW3571	SF_CORE	SF_UNCERTAIN
accA__b0185__JW0180	yihP__b3877__JW3848	SF_CORE	SF_UNCERTAIN
accA__b0185__JW0180	yjbF__b4027__JW5711	SF_CORE	SF_PREDICTED
accA__b0185__JW0180	yjcD__b4064__JW4025	SF_CORE	SF_PREDICTED
accA__b0185__JW0180	yraP__b3150__JW3119	SF_CORE	MF_UNCERTAIN
accA__b0185__JW0180	yrbK__b3199__JW3166	SF_CORE	SF_CORE
accA__b0185__JW0180	ytfN__b4221__JW4180	SF_CORE	SF_PREDICTED
accB__b3255__JW3223	ackA__b2296__JW2293	SF_CORE	SF_UNCERTAIN
accB__b3255__JW3223	acrB__b0462__JW0451	SF_CORE	SF_UNCERTAIN
accB__b3255__JW3223	alr__b4053__JW4013	SF_CORE	SF_CORE
accB__b3255__JW3223	ansB__b2957__JW2924	SF_CORE	SF_UNCERTAIN
accB__b3255__JW3223	appB__b0979__JW0961	SF_CORE	SF_UNCERTAIN
accB__b3255__JW3223	arcB__b3210__JW5536	SF_CORE	SF_UNCERTAIN
accB__b3255__JW3223	btuF__b0158__JW0154	SF_CORE	SF_UNCERTAIN
accB__b3255__JW3223	cheB__b1883__JW1872	SF_CORE	SF_UNCERTAIN
accB__b3255__JW3223	chiA__b3338__JW3300	SF_CORE	SF_UNCERTAIN
accB__b3255__JW3223	cirA__b2155__JW2142	SF_CORE	SF_UNCERTAIN
accB__b3255__JW3223	cpsB__b2049__JW2034	SF_CORE	SF_CORE
accB__b3255__JW3223	crcB__b0624__JW0619	SF_CORE	SF_UNCERTAIN
accB__b3255__JW3223	csgE__b1039__JW1022	SF_CORE	SF_UNCERTAIN
accB__b3255__JW3223	cusA__b0575__JW0564	SF_CORE	SF_UNCERTAIN
accB__b3255__JW3223	cydB__b0734__JW0723	SF_CORE	SF_UNCERTAIN
accB__b3255__JW3223	cydC__b0886__JW0869	SF_CORE	SF_UNCERTAIN
accB__b3255__JW3223	cyoB__b0431__JW0421	SF_CORE	SF_UNCERTAIN
accB__b3255__JW3223	damX__b3388__JW3351	SF_CORE	SF_UNCERTAIN
accB__b3255__JW3223	ddpA__b1487__JW5240	SF_CORE	SF_CORE
accB__b3255__JW3223	ddpX__b1488__JW1483	SF_CORE	SF_CORE
accB__b3255__JW3223	dsbA__b3860__JW3832	SF_CORE	SF_CORE
accB__b3255__JW3223	emrA__b2685__JW2660	SF_CORE	SF_UNCERTAIN
accB__b3255__JW3223	entC__b0593__JW0585	SF_CORE	SF_CORE
accB__b3255__JW3223	entE__b0594__JW0586	SF_CORE	SF_CORE
accB__b3255__JW3223	exbB__b3006__JW2974	SF_CORE	SF_CORE
accB__b3255__JW3223	exbD__b3005__JW2973	SF_CORE	SF_CORE
accB__b3255__JW3223	fabA__b0954__JW0937	SF_CORE	SF_CORE
accB__b3255__JW3223	fepC__b0588__JW0580	SF_CORE	SF_CORE
accB__b3255__JW3223	fhuA__b0150__JW0146	SF_CORE	SF_UNCERTAIN
accB__b3255__JW3223	fhuE__b1102__JW1088	SF_CORE	SF_UNCERTAIN
accB__b3255__JW3223	fimD__b4317__JW5780	SF_CORE	SF_UNCERTAIN
accB__b3255__JW3223	fiu__b0805__JW0790	SF_CORE	SF_UNCERTAIN
accB__b3255__JW3223	folM__b1606__JW1598	SF_CORE	SF_UNCERTAIN
accB__b3255__JW3223	frdA__b4154__JW4115	SF_CORE	SF_UNCERTAIN
accB__b3255__JW3223	frdB__b4153__JW4114	SF_CORE	SF_UNCERTAIN
accB__b3255__JW3223	frdC__b4152__JW4113	SF_CORE	SF_UNCERTAIN
accB__b3255__JW3223	frdD__b4151__JW4112	SF_CORE	SF_UNCERTAIN
accB__b3255__JW3223	frlB__b3371__JW5700	SF_CORE	SF_UNCERTAIN
accB__b3255__JW3223	ftsE__b3463__JW3428	SF_CORE	SF_CORE
accB__b3255__JW3223	galF__b2042__JW2027	SF_CORE	MF_CORE
accB__b3255__JW3223	glgC__b3430__JW3393	SF_CORE	SF_UNCERTAIN
accB__b3255__JW3223	gspA__b3323__JW3285	SF_CORE	SF_UNCERTAIN
accB__b3255__JW3223	gspD__b3325__JW5707	SF_CORE	SF_UNCERTAIN
accB__b3255__JW3223	gspG__b3328__JW3290	SF_CORE	SF_UNCERTAIN
accB__b3255__JW3223	gspJ__b3331__JW3293	SF_CORE	SF_UNCERTAIN
accB__b3255__JW3223	gspO__b3335__JW3297	SF_CORE	SF_UNCERTAIN
accB__b3255__JW3223	hemX__b3803__JW3775	SF_CORE	SF_UNCERTAIN
accB__b3255__JW3223	hsrA__b3754__JW3733	SF_CORE	SF_PREDICTED
accB__b3255__JW3223	htrE__b0139__JW0135	SF_CORE	SF_PREDICTED
accB__b3255__JW3223	kdsC__b3198__JW3165	SF_CORE	SF_CORE
accB__b3255__JW3223	kdsD__b3197__JW3164	SF_CORE	SF_CORE
accB__b3255__JW3223	kefA__b0465__JW0454	SF_CORE	SF_UNCERTAIN
accB__b3255__JW3223	lamB__b4036__JW3996	SF_CORE	SF_CORE
accB__b3255__JW3223	lpxA__b0181__JW0176	SF_CORE	SF_CORE
accB__b3255__JW3223	mdlA__b0448__JW0438	SF_CORE	SF_UNCERTAIN
accB__b3255__JW3223	mdtF__b3514__JW3482	SF_CORE	SF_UNCERTAIN
accB__b3255__JW3223	mdtJ__b1600__JW1592	SF_CORE	SF_UNCERTAIN
accB__b3255__JW3223	mdtL__b3710__JW3688	SF_CORE	SF_UNCERTAIN
accB__b3255__JW3223	mltB__b2701__JW2671	SF_CORE	MF_CORE
accB__b3255__JW3223	mltC__b2963__JW5481	SF_CORE	MF_CORE
accB__b3255__JW3223	motA__b1890__JW1879	SF_CORE	SF_UNCERTAIN
accB__b3255__JW3223	motB__b1889__JW1878	SF_CORE	SF_UNCERTAIN
accB__b3255__JW3223	mrcA__b3396__JW3359	SF_CORE	SF_CORE
accB__b3255__JW3223	mtgA__b3208__JW3175	SF_CORE	MF_CORE
accB__b3255__JW3223	mtr__b3161__JW3130	SF_CORE	SF_UNCERTAIN
accB__b3255__JW3223	murB__b3972__JW3940	SF_CORE	SF_CORE
accB__b3255__JW3223	nanA__b3225__JW3194	SF_CORE	SF_UNCERTAIN
accB__b3255__JW3223	nanK__b3222__JW5538	SF_CORE	SF_UNCERTAIN
accB__b3255__JW3223	nfrA__b0568__JW0557	SF_CORE	SF_UNCERTAIN
accB__b3255__JW3223	nlpE__b0192__JW0188	SF_CORE	SF_UNCERTAIN
accB__b3255__JW3223	ompL__b3875__JW3846	SF_CORE	SF_UNCERTAIN
accB__b3255__JW3223	ompN__b1377__JW1371	SF_CORE	SF_UNCERTAIN
accB__b3255__JW3223	ompT__b0565__JW0554	SF_CORE	SF_UNCERTAIN
accB__b3255__JW3223	paaA__b1388__JW1383	SF_CORE	SF_CORE
accB__b3255__JW3223	paaB__b1389__JW1384	SF_CORE	SF_CORE
accB__b3255__JW3223	paaE__b1392__JW1387	SF_CORE	SF_CORE
accB__b3255__JW3223	pabB__b1812__JW1801	SF_CORE	SF_UNCERTAIN
accB__b3255__JW3223	panB__b0134__JW0130	SF_CORE	SF_CORE
accB__b3255__JW3223	panC__b0133__JW0129	SF_CORE	SF_CORE
accB__b3255__JW3223	panE__b0425__JW0415	SF_CORE	SF_CORE
accB__b3255__JW3223	pgsA__b1912__JW1897	SF_CORE	SF_CORE
accB__b3255__JW3223	phoE__b0241__JW0231	SF_CORE	SF_CORE
accB__b3255__JW3223	pldA__b3821__JW3794	SF_CORE	MF_UNCERTAIN
accB__b3255__JW3223	pta__b2297__JW2294	SF_CORE	SF_UNCERTAIN
accB__b3255__JW3223	rfaY__b3625__JW3600	SF_CORE	SF_CORE
accB__b3255__JW3223	rffM__b3794__JW3770	SF_CORE	SF_CORE
accB__b3255__JW3223	rof__b0189__JW0184	SF_CORE	SF_CORE
accB__b3255__JW3223	rpoS__b2741__JW5437	SF_CORE	SF_CORE
accB__b3255__JW3223	rssA__b1234__JW1222	SF_CORE	SF_UNCERTAIN
accB__b3255__JW3223	sapF__b1290__JW1283	SF_CORE	SF_UNCERTAIN
accB__b3255__JW3223	secG__b3175__JW3142	SF_CORE	SF_CORE
accB__b3255__JW3223	secY__b3300__JW3262	SF_CORE	SF_CORE
accB__b3255__JW3223	sfmC__b0531__JW0520	SF_CORE	SF_UNCERTAIN
accB__b3255__JW3223	sfmD__b0532__JW0521	SF_CORE	SF_UNCERTAIN
accB__b3255__JW3223	sohA__b3129__JW3098	SF_CORE	SF_UNCERTAIN
accB__b3255__JW3223	spoT__b3650__JW3625	SF_CORE	SF_UNCERTAIN
accB__b3255__JW3223	tar__b1886__JW1875	SF_CORE	SF_UNCERTAIN
accB__b3255__JW3223	tatE__b0627__JW0622	SF_CORE	SF_CORE
accB__b3255__JW3223	tsx__b0411__JW0401	SF_CORE	SF_UNCERTAIN
accB__b3255__JW3223	ubiE__b3833__JW5581	SF_CORE	SF_UNCERTAIN
accB__b3255__JW3223	ubiF__b0662__JW0659	SF_CORE	SF_UNCERTAIN
accB__b3255__JW3223	ugd__b2028__JW2010	SF_CORE	MF_CORE
accB__b3255__JW3223	wbbH__b2035__JW2020	SF_CORE	SF_CORE
accB__b3255__JW3223	wcaD__b2056__JW2041	SF_CORE	SF_UNCERTAIN
accB__b3255__JW3223	yahF__b0320__JW0312	SF_CORE	SF_UNCERTAIN
accB__b3255__JW3223	yaiO__b0358__JW0349	SF_CORE	SF_UNCERTAIN
accB__b3255__JW3223	yaiS__b0364__JW0356	SF_CORE	SF_PREDICTED
accB__b3255__JW3223	yajI__b0412__JW5056	SF_CORE	SF_PREDICTED
accB__b3255__JW3223	yajR__b0427__JW5059	SF_CORE	SF_PREDICTED
accB__b3255__JW3223	ybaL__b0478__JW0467	SF_CORE	SF_PREDICTED
accB__b3255__JW3223	ybaT__b0486__JW0475	SF_CORE	SF_PREDICTED
accB__b3255__JW3223	ybaW__b0443__JW0433	SF_CORE	MF_UNCERTAIN
accB__b3255__JW3223	ybaY__b0453__JW0443	SF_CORE	SF_PREDICTED
accB__b3255__JW3223	ybbY__b0513__JW0501	SF_CORE	SF_PREDICTED
accB__b3255__JW3223	ybhG__b0795__JW0779	SF_CORE	SF_UNCERTAIN
accB__b3255__JW3223	ybhI__b0770__JW0753	SF_CORE	SF_PREDICTED
accB__b3255__JW3223	ybiV__b0822__JW0806	SF_CORE	SF_UNCERTAIN
accB__b3255__JW3223	ybjL__b0847__JW0831	SF_CORE	SF_PREDICTED
accB__b3255__JW3223	ybjP__b0865__JW0849	SF_CORE	SF_PREDICTED
accB__b3255__JW3223	ycaD__b0898__JW0881	SF_CORE	SF_PREDICTED
accB__b3255__JW3223	ycbS__b0940__JW0923	SF_CORE	SF_PREDICTED
accB__b3255__JW3223	yccS__b0960__JW5128	SF_CORE	SF_PREDICTED
accB__b3255__JW3223	ycdQ__b1022__JW1007	SF_CORE	SF_UNCERTAIN
accB__b3255__JW3223	yceK__b1050__JW5151	SF_CORE	SF_PREDICTED
accB__b3255__JW3223	ycfL__b1104__JW1090	SF_CORE	SF_PREDICTED
accB__b3255__JW3223	ycfM__b1105__JW5157	SF_CORE	SF_PREDICTED
accB__b3255__JW3223	ychP__b1220__JW1211	SF_CORE	SF_PREDICTED
accB__b3255__JW3223	ycjG__b1325__JW1318	SF_CORE	SF_PREDICTED
accB__b3255__JW3223	ydcO__b1433__JW5229	SF_CORE	SF_PREDICTED
accB__b3255__JW3223	yddL__b1472__JW1468	SF_CORE	SF_PREDICTED
accB__b3255__JW3223	yddW__b1491__JW1486	SF_CORE	SF_PREDICTED
accB__b3255__JW3223	ydeA__b1528__JW1521	SF_CORE	SF_PREDICTED
accB__b3255__JW3223	ydeK__b1510__JW1503	SF_CORE	SF_PREDICTED
accB__b3255__JW3223	ydgA__b1614__JW1606	SF_CORE	SF_UNCERTAIN
accB__b3255__JW3223	ydhK__b1645__JW1637	SF_CORE	SF_PREDICTED
accB__b3255__JW3223	ydiN__b1691__JW5274	SF_CORE	SF_PREDICTED
accB__b3255__JW3223	yedE__b1929__JW1914	SF_CORE	SF_PREDICTED
accB__b3255__JW3223	yegE__b2067__JW2052	SF_CORE	SF_PREDICTED
accB__b3255__JW3223	yehT__b2125__JW5352	SF_CORE	SF_UNCERTAIN
accB__b3255__JW3223	yehU__b2126__JW5353	SF_CORE	MF_PREDICTED
accB__b3255__JW3223	yeiB__b2152__JW2139	SF_CORE	SF_PREDICTED
accB__b3255__JW3223	yeiM__b2164__JW2151	SF_CORE	SF_PREDICTED
accB__b3255__JW3223	yfaL__b2233__JW2227	SF_CORE	SF_UNCERTAIN
accB__b3255__JW3223	yfbS__b2292__JW2289	SF_CORE	SF_PREDICTED
accB__b3255__JW3223	yfbW__b4544__JW2252	SF_CORE	SF_CORE
accB__b3255__JW3223	yfcJ__b2322__JW2319	SF_CORE	SF_PREDICTED
accB__b3255__JW3223	yfdG__b2350__JW2346	SF_CORE	SF_UNCERTAIN
accB__b3255__JW3223	yfdH__b2351__JW2347	SF_CORE	SF_UNCERTAIN
accB__b3255__JW3223	yfdV__b2372__JW2369	SF_CORE	SF_PREDICTED
accB__b3255__JW3223	yfeH__b2410__JW5876	SF_CORE	SF_PREDICTED
accB__b3255__JW3223	yfeO__b2389__JW2386	SF_CORE	SF_PREDICTED
accB__b3255__JW3223	yfgH__b2505__JW5400	SF_CORE	SF_PREDICTED
accB__b3255__JW3223	ygaD__b2700__JW2670	SF_CORE	SF_UNCERTAIN
accB__b3255__JW3223	ygeR__b2865__JW2833	SF_CORE	SF_UNCERTAIN
accB__b3255__JW3223	ygfU__b2888__JW5470	SF_CORE	SF_PREDICTED
accB__b3255__JW3223	ygiH__b3059__JW3031	SF_CORE	MF_UNCERTAIN
accB__b3255__JW3223	ygjI__b3078__JW5512	SF_CORE	SF_PREDICTED
accB__b3255__JW3223	ygjJ__b3079__JW3050	SF_CORE	SF_PREDICTED
accB__b3255__JW3223	yhbN__b3200__JW3167	SF_CORE	SF_CORE
accB__b3255__JW3223	yhgE__b3402__JW3365	SF_CORE	SF_PREDICTED
accB__b3255__JW3223	yhgN__b3434__JW3397	SF_CORE	SF_PREDICTED
accB__b3255__JW3223	yhiI__b3487__JW3454	SF_CORE	SF_PREDICTED
accB__b3255__JW3223	yhjE__b3523__JW3491	SF_CORE	SF_PREDICTED
accB__b3255__JW3223	yhjV__b3539__JW3508	SF_CORE	SF_PREDICTED
accB__b3255__JW3223	yiaT__b3584__JW3556	SF_CORE	SF_PREDICTED
accB__b3255__JW3223	yiaV__b3586__JW3558	SF_CORE	SF_UNCERTAIN
accB__b3255__JW3223	yibH__b3597__JW3571	SF_CORE	SF_UNCERTAIN
accB__b3255__JW3223	yieG__b3714__JW3692	SF_CORE	SF_PREDICTED
accB__b3255__JW3223	yifK__b3795__JW5595	SF_CORE	SF_PREDICTED
accB__b3255__JW3223	yihP__b3877__JW3848	SF_CORE	SF_UNCERTAIN
accB__b3255__JW3223	yiiU__b3928__JW3899	SF_CORE	SF_CORE
accB__b3255__JW3223	yjcD__b4064__JW4025	SF_CORE	SF_PREDICTED
accB__b3255__JW3223	yjcE__b4065__JW4026	SF_CORE	SF_UNCERTAIN
accB__b3255__JW3223	yjcH__b4068__JW4029	SF_CORE	SF_PREDICTED
accB__b3255__JW3223	yjcR__b4082__JW4043	SF_CORE	SF_UNCERTAIN
accB__b3255__JW3223	yjgJ__b4251__JW4208	SF_CORE	SF_UNCERTAIN
accB__b3255__JW3223	yjgQ__b4262__JW5760	SF_CORE	SF_CORE
accB__b3255__JW3223	yjhF__b4296__JW4258	SF_CORE	SF_PREDICTED
accB__b3255__JW3223	yjiO__b4337__JW4300	SF_CORE	SF_UNCERTAIN
accB__b3255__JW3223	ymcA__b0984__JW0967	SF_CORE	SF_PREDICTED
accB__b3255__JW3223	ymgF__b4520__JW1156	SF_CORE	SF_UNCERTAIN
accB__b3255__JW3223	ynaI__b1330__JW1323	SF_CORE	SF_PREDICTED
accB__b3255__JW3223	ynbB__b1409__JW1406	SF_CORE	SF_UNCERTAIN
accB__b3255__JW3223	ynfM__b1596__JW1588	SF_CORE	SF_PREDICTED
accB__b3255__JW3223	ypjA__b2647__JW5422	SF_CORE	SF_UNCERTAIN
accB__b3255__JW3223	yqcE__b2775__JW2746	SF_CORE	SF_PREDICTED
accB__b3255__JW3223	yraJ__b3144__JW3113	SF_CORE	SF_PREDICTED
accB__b3255__JW3223	yraP__b3150__JW3119	SF_CORE	MF_UNCERTAIN
accB__b3255__JW3223	ytfN__b4221__JW4180	SF_CORE	SF_PREDICTED
accC__b3256__JW3224	amiA__b2435__JW2428	SF_CORE	SF_CORE
accC__b3256__JW3224	cycA__b4208__JW4166	SF_CORE	SF_CORE
accC__b3256__JW3224	dacC__b0839__JW0823	SF_CORE	SF_CORE
accC__b3256__JW3224	exbB__b3006__JW2974	SF_CORE	SF_CORE
accC__b3256__JW3224	glmM__b3176__JW3143	SF_CORE	MF_CORE
accC__b3256__JW3224	ugd__b2028__JW2010	SF_CORE	MF_CORE
accC__b3256__JW3224	ydhO__b1655__JW5270	SF_CORE	SF_PREDICTED
accC__b3256__JW3224	yfbJ__b2258__JW5373	SF_CORE	SF_CORE
accC__b3256__JW3224	yhbN__b3200__JW3167	SF_CORE	SF_CORE
accC__b3256__JW3224	ynaI__b1330__JW1323	SF_CORE	SF_PREDICTED
accC__b3256__JW3224	ypdA__b2380__JW5388	SF_CORE	SF_PREDICTED
ackA__b2296__JW2293	acpS__b2563__JW2547	SF_UNCERTAIN	SF_CORE
ackA__b2296__JW2293	ampH__b0376__JW5052	SF_UNCERTAIN	SF_CORE
ackA__b2296__JW2293	appB__b0979__JW0961	SF_UNCERTAIN	SF_UNCERTAIN
ackA__b2296__JW2293	appC__b0978__JW0960	SF_UNCERTAIN	SF_UNCERTAIN
ackA__b2296__JW2293	bcr__b2182__JW5363	SF_UNCERTAIN	SF_PREDICTED
ackA__b2296__JW2293	bglH__b3720__JW3698	SF_UNCERTAIN	SF_PREDICTED
ackA__b2296__JW2293	birA__b3973__JW3941	SF_UNCERTAIN	SF_CORE
ackA__b2296__JW2293	caiE__b0035__JW5004	SF_UNCERTAIN	SF_UNCERTAIN
ackA__b2296__JW2293	ccmE__b2197__JW2185	SF_UNCERTAIN	SF_UNCERTAIN
ackA__b2296__JW2293	cfa__b1661__JW1653	SF_UNCERTAIN	SF_CORE
ackA__b2296__JW2293	cheW__b1887__JW1876	SF_UNCERTAIN	SF_UNCERTAIN
ackA__b2296__JW2293	coaD__b3634__JW3609	SF_UNCERTAIN	SF_CORE
ackA__b2296__JW2293	cpxP__b3913__JW5558	SF_UNCERTAIN	SF_CORE
ackA__b2296__JW2293	cusA__b0575__JW0564	SF_UNCERTAIN	SF_UNCERTAIN
ackA__b2296__JW2293	cusF__b0573__JW0562	SF_UNCERTAIN	SF_UNCERTAIN
ackA__b2296__JW2293	ddpF__b1483__JW1478	SF_UNCERTAIN	SF_CORE
ackA__b2296__JW2293	dppD__b3541__JW3510	SF_UNCERTAIN	SF_CORE
ackA__b2296__JW2293	dsbG__b0604__JW0597	SF_UNCERTAIN	SF_CORE
ackA__b2296__JW2293	dxs__b0420__JW0410	SF_UNCERTAIN	SF_CORE
ackA__b2296__JW2293	ecnB__b4411__JW4108	SF_UNCERTAIN	SF_UNCERTAIN
ackA__b2296__JW2293	emtA__b1193__JW5821	SF_UNCERTAIN	MF_CORE
ackA__b2296__JW2293	entC__b0593__JW0585	SF_UNCERTAIN	SF_CORE
ackA__b2296__JW2293	fabG__b1093__JW1079	SF_UNCERTAIN	SF_CORE
ackA__b2296__JW2293	fadD__b1805__JW1794	SF_UNCERTAIN	SF_CORE
ackA__b2296__JW2293	fecB__b4290__JW4250	SF_UNCERTAIN	SF_UNCERTAIN
ackA__b2296__JW2293	fecC__b4289__JW4249	SF_UNCERTAIN	SF_UNCERTAIN
ackA__b2296__JW2293	ffh__b2610__JW5414	SF_UNCERTAIN	SF_CORE
ackA__b2296__JW2293	fhuC__b0151__JW0147	SF_UNCERTAIN	SF_UNCERTAIN
ackA__b2296__JW2293	ftsE__b3463__JW3428	SF_UNCERTAIN	SF_CORE
ackA__b2296__JW2293	ftsL__b0083__JW0081	SF_UNCERTAIN	SF_CORE
ackA__b2296__JW2293	galF__b2042__JW2027	SF_UNCERTAIN	MF_CORE
ackA__b2296__JW2293	galT__b0758__JW0741	SF_UNCERTAIN	MF_CORE
ackA__b2296__JW2293	glpQ__b2239__JW2233	SF_UNCERTAIN	SF_CORE
ackA__b2296__JW2293	glpT__b2240__JW2234	SF_UNCERTAIN	SF_CORE
ackA__b2296__JW2293	gspA__b3323__JW3285	SF_UNCERTAIN	SF_UNCERTAIN
ackA__b2296__JW2293	hemY__b3802__JW3774	SF_UNCERTAIN	SF_UNCERTAIN
ackA__b2296__JW2293	ispE__b1208__JW1199	SF_UNCERTAIN	SF_CORE
ackA__b2296__JW2293	ispH__b0029__JW0027	SF_UNCERTAIN	SF_CORE
ackA__b2296__JW2293	ispU__b0174__JW0169	SF_UNCERTAIN	MF_CORE
ackA__b2296__JW2293	kdsA__b1215__JW1206	SF_UNCERTAIN	SF_CORE
ackA__b2296__JW2293	kdsB__b0918__JW0901	SF_UNCERTAIN	SF_CORE
ackA__b2296__JW2293	lolA__b0891__JW0874	SF_UNCERTAIN	MF_CORE
ackA__b2296__JW2293	mdlB__b0449__JW5061	SF_UNCERTAIN	SF_UNCERTAIN
ackA__b2296__JW2293	mdtE__b3513__JW3481	SF_UNCERTAIN	SF_UNCERTAIN
ackA__b2296__JW2293	mdtJ__b1600__JW1592	SF_UNCERTAIN	SF_UNCERTAIN
ackA__b2296__JW2293	mdtK__b1663__JW1655	SF_UNCERTAIN	SF_UNCERTAIN
ackA__b2296__JW2293	mdtL__b3710__JW3688	SF_UNCERTAIN	SF_UNCERTAIN
ackA__b2296__JW2293	minD__b1175__JW1164	SF_UNCERTAIN	SF_CORE
ackA__b2296__JW2293	mipA__b1782__JW1771	SF_UNCERTAIN	SF_CORE
ackA__b2296__JW2293	mraY__b0087__JW0085	SF_UNCERTAIN	SF_CORE
ackA__b2296__JW2293	mreC__b3250__JW3219	SF_UNCERTAIN	MF_CORE
ackA__b2296__JW2293	mukB__b0924__JW0907	SF_UNCERTAIN	MF_CORE
ackA__b2296__JW2293	nanE__b3223__JW3192	SF_UNCERTAIN	SF_UNCERTAIN
ackA__b2296__JW2293	nudD__b2051__JW5335	SF_UNCERTAIN	MF_UNCERTAIN
ackA__b2296__JW2293	ompW__b1256__JW1248	SF_UNCERTAIN	SF_UNCERTAIN
ackA__b2296__JW2293	ompX__b0814__JW0799	SF_UNCERTAIN	SF_UNCERTAIN
ackA__b2296__JW2293	osmB__b1283__JW1275	SF_UNCERTAIN	SF_CORE
ackA__b2296__JW2293	paaH__b1395__JW1390	SF_UNCERTAIN	SF_CORE
ackA__b2296__JW2293	panF__b3258__JW3226	SF_UNCERTAIN	SF_UNCERTAIN
ackA__b2296__JW2293	parE__b3030__JW2998	SF_UNCERTAIN	SF_UNCERTAIN
ackA__b2296__JW2293	pbpG__b2134__JW5355	SF_UNCERTAIN	SF_CORE
ackA__b2296__JW2293	pgpB__b1278__JW1270	SF_UNCERTAIN	MF_CORE
ackA__b2296__JW2293	pldA__b3821__JW3794	SF_UNCERTAIN	MF_UNCERTAIN
ackA__b2296__JW2293	pldB__b3825__JW5584	SF_UNCERTAIN	SF_CORE
ackA__b2296__JW2293	pppA__b2972__JW2939	SF_UNCERTAIN	SF_UNCERTAIN
ackA__b2296__JW2293	rfaB__b3628__JW3603	SF_UNCERTAIN	SF_CORE
ackA__b2296__JW2293	rfaJ__b3626__JW3601	SF_UNCERTAIN	SF_CORE
ackA__b2296__JW2293	rfaS__b3629__JW3604	SF_UNCERTAIN	SF_UNCERTAIN
ackA__b2296__JW2293	rfbA__b2039__JW2024	SF_UNCERTAIN	SF_CORE
ackA__b2296__JW2293	rffA__b3791__JW3765	SF_UNCERTAIN	SF_CORE
ackA__b2296__JW2293	rhsA__b3593__JW3566	SF_UNCERTAIN	SF_PREDICTED
ackA__b2296__JW2293	rhsE__b1456__JW1451	SF_UNCERTAIN	SF_PREDICTED
ackA__b2296__JW2293	rlpA__b0633__JW0628	SF_UNCERTAIN	SF_PREDICTED
ackA__b2296__JW2293	rne__b1084__JW1071	SF_UNCERTAIN	SF_UNCERTAIN
ackA__b2296__JW2293	rpmA__b3185__JW3152	SF_UNCERTAIN	SF_UNCERTAIN
ackA__b2296__JW2293	tonB__b1252__JW5195	SF_UNCERTAIN	SF_CORE
ackA__b2296__JW2293	vacJ__b2346__JW2343	SF_UNCERTAIN	SF_CORE
ackA__b2296__JW2293	wbbI__b2034__JW2019	SF_UNCERTAIN	SF_CORE
ackA__b2296__JW2293	wbbK__b2032__JW2017	SF_UNCERTAIN	SF_PREDICTED
ackA__b2296__JW2293	wcaE__b2055__JW2040	SF_UNCERTAIN	SF_UNCERTAIN
ackA__b2296__JW2293	wcaF__b2054__JW2039	SF_UNCERTAIN	SF_UNCERTAIN
ackA__b2296__JW2293	wzxE__b3792__JW3766	SF_UNCERTAIN	MF_CORE
ackA__b2296__JW2293	wzzE__b3785__JW5601	SF_UNCERTAIN	MF_CORE
ackA__b2296__JW2293	xerC__b3811__JW3784	SF_UNCERTAIN	MF_CORE
ackA__b2296__JW2293	xerD__b2894__JW2862	SF_UNCERTAIN	MF_CORE
ackA__b2296__JW2293	yaaU__b0045__JW0044	SF_UNCERTAIN	SF_PREDICTED
ackA__b2296__JW2293	yaeT__b0177__JW0172	SF_UNCERTAIN	SF_CORE
ackA__b2296__JW2293	yafD__b0209__JW5017	SF_UNCERTAIN	SF_PREDICTED
ackA__b2296__JW2293	yagX__b0291__JW0285	SF_UNCERTAIN	SF_PREDICTED
ackA__b2296__JW2293	yaiS__b0364__JW0356	SF_UNCERTAIN	SF_PREDICTED
ackA__b2296__JW2293	yaiT__b0371__JW0362	SF_UNCERTAIN	SF_PREDICTED
ackA__b2296__JW2293	yajR__b0427__JW5059	SF_UNCERTAIN	SF_PREDICTED
ackA__b2296__JW2293	ybbW__b0511__JW0499	SF_UNCERTAIN	SF_PREDICTED
ackA__b2296__JW2293	ybgC__b0736__JW0726	SF_UNCERTAIN	SF_UNCERTAIN
ackA__b2296__JW2293	ybiR__b0818__JW0802	SF_UNCERTAIN	SF_PREDICTED
ackA__b2296__JW2293	ybjG__b0841__JW5112	SF_UNCERTAIN	MF_CORE
ackA__b2296__JW2293	ybjL__b0847__JW0831	SF_UNCERTAIN	SF_PREDICTED
ackA__b2296__JW2293	ycaD__b0898__JW0881	SF_UNCERTAIN	SF_PREDICTED
ackA__b2296__JW2293	ycdQ__b1022__JW1007	SF_UNCERTAIN	SF_UNCERTAIN
ackA__b2296__JW2293	yceK__b1050__JW5151	SF_UNCERTAIN	SF_PREDICTED
ackA__b2296__JW2293	ycfM__b1105__JW5157	SF_UNCERTAIN	SF_PREDICTED
ackA__b2296__JW2293	ycfN__b1106__JW1092	SF_UNCERTAIN	SF_UNCERTAIN
ackA__b2296__JW2293	ycgV__b1202__JW1193	SF_UNCERTAIN	SF_PREDICTED
ackA__b2296__JW2293	yddB__b1495__JW1490	SF_UNCERTAIN	SF_PREDICTED
ackA__b2296__JW2293	ydeK__b1510__JW1503	SF_UNCERTAIN	SF_PREDICTED
ackA__b2296__JW2293	ydfJ__b1543__JW1536	SF_UNCERTAIN	SF_PREDICTED
ackA__b2296__JW2293	ydhK__b1645__JW1637	SF_UNCERTAIN	SF_PREDICTED
ackA__b2296__JW2293	ydhP__b1657__JW1649	SF_UNCERTAIN	SF_PREDICTED
ackA__b2296__JW2293	ydiY__b1722__JW1711	SF_UNCERTAIN	SF_PREDICTED
ackA__b2296__JW2293	yeaY__b1806__JW1795	SF_UNCERTAIN	SF_PREDICTED
ackA__b2296__JW2293	yebQ__b1828__JW5299	SF_UNCERTAIN	SF_PREDICTED
ackA__b2296__JW2293	yeeF__b2014__JW5330	SF_UNCERTAIN	SF_PREDICTED
ackA__b2296__JW2293	yegE__b2067__JW2052	SF_UNCERTAIN	SF_PREDICTED
ackA__b2296__JW2293	yehB__b2109__JW2096	SF_UNCERTAIN	SF_PREDICTED
ackA__b2296__JW2293	yfaV__b2246__JW2240	SF_UNCERTAIN	SF_PREDICTED
ackA__b2296__JW2293	yfaW__b2247__JW2241	SF_UNCERTAIN	SF_UNCERTAIN
ackA__b2296__JW2293	yfbW__b4544__JW2252	SF_UNCERTAIN	SF_CORE
ackA__b2296__JW2293	yfcU__b2338__JW2335	SF_UNCERTAIN	SF_PREDICTED
ackA__b2296__JW2293	yfcY__b2342__JW2339	SF_UNCERTAIN	SF_CORE
ackA__b2296__JW2293	yfdG__b2350__JW2346	SF_UNCERTAIN	SF_UNCERTAIN
ackA__b2296__JW2293	yfdH__b2351__JW2347	SF_UNCERTAIN	SF_UNCERTAIN
ackA__b2296__JW2293	yfdI__b2352__JW5382	SF_UNCERTAIN	SF_PREDICTED
ackA__b2296__JW2293	yfdV__b2372__JW2369	SF_UNCERTAIN	SF_PREDICTED
ackA__b2296__JW2293	yfeH__b2410__JW5876	SF_UNCERTAIN	SF_PREDICTED
ackA__b2296__JW2293	yfeN__b2408__JW2399	SF_UNCERTAIN	SF_PREDICTED
ackA__b2296__JW2293	yfeO__b2389__JW2386	SF_UNCERTAIN	SF_PREDICTED
ackA__b2296__JW2293	yfgH__b2505__JW5400	SF_UNCERTAIN	SF_PREDICTED
ackA__b2296__JW2293	yfiB__b2605__JW2586	SF_UNCERTAIN	SF_PREDICTED
ackA__b2296__JW2293	ygbN__b2740__JW2710	SF_UNCERTAIN	SF_PREDICTED
ackA__b2296__JW2293	ygcS__b2771__JW5845	SF_UNCERTAIN	SF_PREDICTED
ackA__b2296__JW2293	ygeR__b2865__JW2833	SF_UNCERTAIN	SF_UNCERTAIN
ackA__b2296__JW2293	ygfQ__b2884__JW5467	SF_UNCERTAIN	SF_PREDICTED
ackA__b2296__JW2293	ygfU__b2888__JW5470	SF_UNCERTAIN	SF_PREDICTED
ackA__b2296__JW2293	ygjJ__b3079__JW3050	SF_UNCERTAIN	SF_PREDICTED
ackA__b2296__JW2293	yhbT__b3157__JW3126	SF_UNCERTAIN	SF_UNCERTAIN
ackA__b2296__JW2293	yhcD__b3216__JW3183	SF_UNCERTAIN	SF_PREDICTED
ackA__b2296__JW2293	yhgE__b3402__JW3365	SF_UNCERTAIN	SF_PREDICTED
ackA__b2296__JW2293	yhhS__b3473__JW5945	SF_UNCERTAIN	SF_PREDICTED
ackA__b2296__JW2293	yhiI__b3487__JW3454	SF_UNCERTAIN	SF_PREDICTED
ackA__b2296__JW2293	yhjX__b3547__JW3516	SF_UNCERTAIN	SF_PREDICTED
ackA__b2296__JW2293	yicO__b3664__JW5636	SF_UNCERTAIN	SF_PREDICTED
ackA__b2296__JW2293	yidE__b3685__JW3662	SF_UNCERTAIN	SF_PREDICTED
ackA__b2296__JW2293	yidK__b3679__JW3655	SF_UNCERTAIN	SF_UNCERTAIN
ackA__b2296__JW2293	yieG__b3714__JW3692	SF_UNCERTAIN	SF_PREDICTED
ackA__b2296__JW2293	yifK__b3795__JW5595	SF_UNCERTAIN	SF_PREDICTED
ackA__b2296__JW2293	yifL__b4558__JW3781	SF_UNCERTAIN	SF_PREDICTED
ackA__b2296__JW2293	yihA__b3865__JW5930	SF_UNCERTAIN	SF_UNCERTAIN
ackA__b2296__JW2293	yjcD__b4064__JW4025	SF_UNCERTAIN	SF_PREDICTED
ackA__b2296__JW2293	yjcE__b4065__JW4026	SF_UNCERTAIN	SF_UNCERTAIN
ackA__b2296__JW2293	yjgJ__b4251__JW4208	SF_UNCERTAIN	SF_UNCERTAIN
ackA__b2296__JW2293	yjgK__b4252__JW5756	SF_UNCERTAIN	SF_UNCERTAIN
ackA__b2296__JW2293	yjiJ__b4332__JW4295	SF_UNCERTAIN	SF_PREDICTED
ackA__b2296__JW2293	yjiO__b4337__JW4300	SF_UNCERTAIN	SF_UNCERTAIN
ackA__b2296__JW2293	ylbH__b0499__JW0488	SF_UNCERTAIN	SF_UNCERTAIN
ackA__b2296__JW2293	ymcA__b0984__JW0967	SF_UNCERTAIN	SF_PREDICTED
ackA__b2296__JW2293	yncD__b1451__JW1446	SF_UNCERTAIN	SF_PREDICTED
ackA__b2296__JW2293	ynfM__b1596__JW1588	SF_UNCERTAIN	SF_PREDICTED
ackA__b2296__JW2293	yojI__b2211__JW2199	SF_UNCERTAIN	SF_UNCERTAIN
ackA__b2296__JW2293	ypdA__b2380__JW5388	SF_UNCERTAIN	SF_PREDICTED
ackA__b2296__JW2293	ypjA__b2647__JW5422	SF_UNCERTAIN	SF_UNCERTAIN
ackA__b2296__JW2293	yqhH__b3014__JW2982	SF_UNCERTAIN	SF_PREDICTED
ackA__b2296__JW2293	ytfB__b4206__JW5745	SF_UNCERTAIN	SF_PREDICTED
acpP__b1094__JW1080	appC__b0978__JW0960	SF_CORE	SF_UNCERTAIN
acpP__b1094__JW1080	ccmE__b2197__JW2185	SF_CORE	SF_UNCERTAIN
acpP__b1094__JW1080	cheB__b1883__JW1872	SF_CORE	SF_UNCERTAIN
acpP__b1094__JW1080	cydC__b0886__JW0869	SF_CORE	SF_UNCERTAIN
acpP__b1094__JW1080	dppB__b3543__JW3512	SF_CORE	SF_CORE
acpP__b1094__JW1080	dppD__b3541__JW3510	SF_CORE	SF_CORE
acpP__b1094__JW1080	frdA__b4154__JW4115	SF_CORE	SF_UNCERTAIN
acpP__b1094__JW1080	ftsE__b3463__JW3428	SF_CORE	SF_CORE
acpP__b1094__JW1080	ftsL__b0083__JW0081	SF_CORE	SF_CORE
acpP__b1094__JW1080	gspA__b3323__JW3285	SF_CORE	SF_UNCERTAIN
acpP__b1094__JW1080	hsrA__b3754__JW3733	SF_CORE	SF_PREDICTED
acpP__b1094__JW1080	lolA__b0891__JW0874	SF_CORE	MF_CORE
acpP__b1094__JW1080	macB__b0879__JW0863	SF_CORE	SF_UNCERTAIN
acpP__b1094__JW1080	mdlB__b0449__JW5061	SF_CORE	SF_UNCERTAIN
acpP__b1094__JW1080	mdtK__b1663__JW1655	SF_CORE	SF_UNCERTAIN
acpP__b1094__JW1080	mukB__b0924__JW0907	SF_CORE	MF_CORE
acpP__b1094__JW1080	ompL__b3875__JW3846	SF_CORE	SF_UNCERTAIN
acpP__b1094__JW1080	panC__b0133__JW0129	SF_CORE	SF_CORE
acpP__b1094__JW1080	pldA__b3821__JW3794	SF_CORE	MF_UNCERTAIN
acpP__b1094__JW1080	rhsA__b3593__JW3566	SF_CORE	SF_PREDICTED
acpP__b1094__JW1080	rplW__b3318__JW3280	SF_CORE	SF_UNCERTAIN
acpP__b1094__JW1080	spoT__b3650__JW3625	SF_CORE	SF_UNCERTAIN
acpP__b1094__JW1080	yaiT__b0371__JW0362	SF_CORE	SF_PREDICTED
acpP__b1094__JW1080	yajR__b0427__JW5059	SF_CORE	SF_PREDICTED
acpP__b1094__JW1080	ybfM__b0681__JW0667	SF_CORE	SF_PREDICTED
acpP__b1094__JW1080	ybhG__b0795__JW0779	SF_CORE	SF_UNCERTAIN
acpP__b1094__JW1080	yceK__b1050__JW5151	SF_CORE	SF_PREDICTED
acpP__b1094__JW1080	ydcO__b1433__JW5229	SF_CORE	SF_PREDICTED
acpP__b1094__JW1080	yddA__b1496__JW5242	SF_CORE	SF_UNCERTAIN
acpP__b1094__JW1080	ydeE__b1534__JW1527	SF_CORE	SF_PREDICTED
acpP__b1094__JW1080	ydeT__b1505__JW1499	SF_CORE	SF_PREDICTED
acpP__b1094__JW1080	ydgI__b1605__JW1597	SF_CORE	SF_PREDICTED
acpP__b1094__JW1080	ydiN__b1691__JW5274	SF_CORE	SF_PREDICTED
acpP__b1094__JW1080	yeeO__b1985__JW1965	SF_CORE	SF_PREDICTED
acpP__b1094__JW1080	yfbS__b2292__JW2289	SF_CORE	SF_PREDICTED
acpP__b1094__JW1080	yfcC__b2298__JW2295	SF_CORE	SF_PREDICTED
acpP__b1094__JW1080	yfdI__b2352__JW5382	SF_CORE	SF_PREDICTED
acpP__b1094__JW1080	yfeO__b2389__JW2386	SF_CORE	SF_PREDICTED
acpP__b1094__JW1080	yfgH__b2505__JW5400	SF_CORE	SF_PREDICTED
acpP__b1094__JW1080	ygeR__b2865__JW2833	SF_CORE	SF_UNCERTAIN
acpP__b1094__JW1080	ygfQ__b2884__JW5467	SF_CORE	SF_PREDICTED
acpP__b1094__JW1080	yhbT__b3157__JW3126	SF_CORE	SF_UNCERTAIN
acpP__b1094__JW1080	yhfK__b3358__JW5701	SF_CORE	SF_PREDICTED
acpP__b1094__JW1080	yhgN__b3434__JW3397	SF_CORE	SF_PREDICTED
acpP__b1094__JW1080	yhjV__b3539__JW3508	SF_CORE	SF_PREDICTED
acpP__b1094__JW1080	yibH__b3597__JW3571	SF_CORE	SF_UNCERTAIN
acpP__b1094__JW1080	yicJ__b3657__JW5939	SF_CORE	SF_PREDICTED
acpP__b1094__JW1080	yihP__b3877__JW3848	SF_CORE	SF_UNCERTAIN
acpP__b1094__JW1080	yiiD__b3888__JW3859	SF_CORE	SF_UNCERTAIN
acpP__b1094__JW1080	yjcD__b4064__JW4025	SF_CORE	SF_PREDICTED
acpP__b1094__JW1080	yjeM__b4156__JW5739	SF_CORE	SF_PREDICTED
acpP__b1094__JW1080	yjeP__b4159__JW4120	SF_CORE	SF_PREDICTED
acpP__b1094__JW1080	yjhA__b4311__JW5778	SF_CORE	SF_PREDICTED
acpP__b1094__JW1080	yjhB__b4279__JW5768	SF_CORE	SF_PREDICTED
acpP__b1094__JW1080	yjiO__b4337__JW4300	SF_CORE	SF_UNCERTAIN
acpP__b1094__JW1080	ylbH__b0499__JW0488	SF_CORE	SF_UNCERTAIN
acpP__b1094__JW1080	ypjA__b2647__JW5422	SF_CORE	SF_UNCERTAIN
acpP__b1094__JW1080	yrbK__b3199__JW3166	SF_CORE	SF_CORE
acpP__b1094__JW1080	ytfN__b4221__JW4180	SF_CORE	SF_PREDICTED
acpS__b2563__JW2547	flgA__b1072__JW1059	SF_CORE	SF_UNCERTAIN
acpS__b2563__JW2547	groL__b4143__JW4103	SF_CORE	SF_CORE
acpS__b2563__JW2547	gspA__b3323__JW3285	SF_CORE	SF_UNCERTAIN
acpS__b2563__JW2547	ispE__b1208__JW1199	SF_CORE	SF_CORE
acpS__b2563__JW2547	rfbC__b2038__JW2023	SF_CORE	SF_CORE
acpS__b2563__JW2547	rpmA__b3185__JW3152	SF_CORE	SF_UNCERTAIN
acpS__b2563__JW2547	spoT__b3650__JW3625	SF_CORE	SF_UNCERTAIN
acpS__b2563__JW2547	ydeT__b1505__JW1499	SF_CORE	SF_PREDICTED
acpS__b2563__JW2547	ydgI__b1605__JW1597	SF_CORE	SF_PREDICTED
acpS__b2563__JW2547	ygfU__b2888__JW5470	SF_CORE	SF_PREDICTED
acpS__b2563__JW2547	yhjE__b3523__JW3491	SF_CORE	SF_PREDICTED
acpS__b2563__JW2547	yhjV__b3539__JW3508	SF_CORE	SF_PREDICTED
acpS__b2563__JW2547	yibH__b3597__JW3571	SF_CORE	SF_UNCERTAIN
acpS__b2563__JW2547	yihP__b3877__JW3848	SF_CORE	SF_UNCERTAIN
acpS__b2563__JW2547	yjbF__b4027__JW5711	SF_CORE	SF_PREDICTED
acpS__b2563__JW2547	yjeM__b4156__JW5739	SF_CORE	SF_PREDICTED
acpS__b2563__JW2547	yjhA__b4311__JW5778	SF_CORE	SF_PREDICTED
acpS__b2563__JW2547	ytfN__b4221__JW4180	SF_CORE	SF_PREDICTED
acrA__b0463__JW0452	cheB__b1883__JW1872	SF_UNCERTAIN	SF_UNCERTAIN
acrA__b0463__JW0452	chiA__b3338__JW3300	SF_UNCERTAIN	SF_UNCERTAIN
acrA__b0463__JW0452	cusA__b0575__JW0564	SF_UNCERTAIN	SF_UNCERTAIN
acrA__b0463__JW0452	dppD__b3541__JW3510	SF_UNCERTAIN	SF_CORE
acrA__b0463__JW0452	gmd__b2053__JW2038	SF_UNCERTAIN	SF_CORE
acrA__b0463__JW0452	gspA__b3323__JW3285	SF_UNCERTAIN	SF_UNCERTAIN
acrA__b0463__JW0452	hflX__b4173__JW4131	SF_UNCERTAIN	SF_UNCERTAIN
acrA__b0463__JW0452	iscS__b2530__JW2514	SF_UNCERTAIN	SF_UNCERTAIN
acrA__b0463__JW0452	ompC__b2215__JW2203	SF_UNCERTAIN	SF_CORE
acrA__b0463__JW0452	ompX__b0814__JW0799	SF_UNCERTAIN	SF_UNCERTAIN
acrA__b0463__JW0452	pldA__b3821__JW3794	SF_UNCERTAIN	MF_UNCERTAIN
acrA__b0463__JW0452	rfaG__b3631__JW3606	SF_UNCERTAIN	SF_CORE
acrA__b0463__JW0452	spoT__b3650__JW3625	SF_UNCERTAIN	SF_UNCERTAIN
acrA__b0463__JW0452	uidC__b1615__JW1607	SF_UNCERTAIN	SF_PREDICTED
acrA__b0463__JW0452	wbbI__b2034__JW2019	SF_UNCERTAIN	SF_CORE
acrA__b0463__JW0452	wbbK__b2032__JW2017	SF_UNCERTAIN	SF_PREDICTED
acrA__b0463__JW0452	ybhI__b0770__JW0753	SF_UNCERTAIN	SF_PREDICTED
acrA__b0463__JW0452	ycdQ__b1022__JW1007	SF_UNCERTAIN	SF_UNCERTAIN
acrA__b0463__JW0452	yddA__b1496__JW5242	SF_UNCERTAIN	SF_UNCERTAIN
acrA__b0463__JW0452	yddW__b1491__JW1486	SF_UNCERTAIN	SF_PREDICTED
acrA__b0463__JW0452	ydeT__b1505__JW1499	SF_UNCERTAIN	SF_PREDICTED
acrA__b0463__JW0452	ydgI__b1605__JW1597	SF_UNCERTAIN	SF_PREDICTED
acrA__b0463__JW0452	ydhO__b1655__JW5270	SF_UNCERTAIN	SF_PREDICTED
acrA__b0463__JW0452	ydiN__b1691__JW5274	SF_UNCERTAIN	SF_PREDICTED
acrA__b0463__JW0452	yfdI__b2352__JW5382	SF_UNCERTAIN	SF_PREDICTED
acrA__b0463__JW0452	yfdV__b2372__JW2369	SF_UNCERTAIN	SF_PREDICTED
acrA__b0463__JW0452	yfeO__b2389__JW2386	SF_UNCERTAIN	SF_PREDICTED
acrA__b0463__JW0452	yfgH__b2505__JW5400	SF_UNCERTAIN	SF_PREDICTED
acrA__b0463__JW0452	yfiB__b2605__JW2586	SF_UNCERTAIN	SF_PREDICTED
acrA__b0463__JW0452	yhjE__b3523__JW3491	SF_UNCERTAIN	SF_PREDICTED
acrA__b0463__JW0452	yhjV__b3539__JW3508	SF_UNCERTAIN	SF_PREDICTED
acrA__b0463__JW0452	yibH__b3597__JW3571	SF_UNCERTAIN	SF_UNCERTAIN
acrA__b0463__JW0452	yihP__b3877__JW3848	SF_UNCERTAIN	SF_UNCERTAIN
acrA__b0463__JW0452	yjbF__b4027__JW5711	SF_UNCERTAIN	SF_PREDICTED
acrA__b0463__JW0452	yjeM__b4156__JW5739	SF_UNCERTAIN	SF_PREDICTED
acrA__b0463__JW0452	yjeP__b4159__JW4120	SF_UNCERTAIN	SF_PREDICTED
acrA__b0463__JW0452	yjhA__b4311__JW5778	SF_UNCERTAIN	SF_PREDICTED
acrA__b0463__JW0452	ypjA__b2647__JW5422	SF_UNCERTAIN	SF_UNCERTAIN
acrA__b0463__JW0452	ytfN__b4221__JW4180	SF_UNCERTAIN	SF_PREDICTED
acrB__b0462__JW0451	ansB__b2957__JW2924	SF_UNCERTAIN	SF_UNCERTAIN
acrB__b0462__JW0451	appC__b0978__JW0960	SF_UNCERTAIN	SF_UNCERTAIN
acrB__b0462__JW0451	cheA__b1888__JW1877	SF_UNCERTAIN	SF_UNCERTAIN
acrB__b0462__JW0451	cusA__b0575__JW0564	SF_UNCERTAIN	SF_UNCERTAIN
acrB__b0462__JW0451	dacC__b0839__JW0823	SF_UNCERTAIN	SF_CORE
acrB__b0462__JW0451	dppD__b3541__JW3510	SF_UNCERTAIN	SF_CORE
acrB__b0462__JW0451	eno__b2779__JW2750	SF_UNCERTAIN	SF_UNCERTAIN
acrB__b0462__JW0451	envC__b3613__JW5646	SF_UNCERTAIN	SF_CORE
acrB__b0462__JW0451	gmd__b2053__JW2038	SF_UNCERTAIN	SF_CORE
acrB__b0462__JW0451	gspA__b3323__JW3285	SF_UNCERTAIN	SF_UNCERTAIN
acrB__b0462__JW0451	hflX__b4173__JW4131	SF_UNCERTAIN	SF_UNCERTAIN
acrB__b0462__JW0451	lpxM__b1855__JW1844	SF_UNCERTAIN	SF_CORE
acrB__b0462__JW0451	mdtK__b1663__JW1655	SF_UNCERTAIN	SF_UNCERTAIN
acrB__b0462__JW0451	oppB__b1244__JW1236	SF_UNCERTAIN	MF_CORE
acrB__b0462__JW0451	pgpB__b1278__JW1270	SF_UNCERTAIN	MF_CORE
acrB__b0462__JW0451	pldA__b3821__JW3794	SF_UNCERTAIN	MF_UNCERTAIN
acrB__b0462__JW0451	prc__b1830__JW1819	SF_UNCERTAIN	MF_CORE
acrB__b0462__JW0451	rfaF__b3620__JW3595	SF_UNCERTAIN	SF_CORE
acrB__b0462__JW0451	rfaG__b3631__JW3606	SF_UNCERTAIN	SF_CORE
acrB__b0462__JW0451	rfaY__b3625__JW3600	SF_UNCERTAIN	SF_CORE
acrB__b0462__JW0451	rfbC__b2038__JW2023	SF_UNCERTAIN	SF_CORE
acrB__b0462__JW0451	rffA__b3791__JW3765	SF_UNCERTAIN	SF_CORE
acrB__b0462__JW0451	tatC__b3839__JW3815	SF_UNCERTAIN	SF_CORE
acrB__b0462__JW0451	torD__b0998__JW0983	SF_UNCERTAIN	SF_UNCERTAIN
acrB__b0462__JW0451	wbbH__b2035__JW2020	SF_UNCERTAIN	SF_CORE
acrB__b0462__JW0451	wbbI__b2034__JW2019	SF_UNCERTAIN	SF_CORE
acrB__b0462__JW0451	wcaM__b2043__JW2028	SF_UNCERTAIN	SF_UNCERTAIN
acrB__b0462__JW0451	yaeF__b0193__JW5016	SF_UNCERTAIN	SF_PREDICTED
acrB__b0462__JW0451	yaiT__b0371__JW0362	SF_UNCERTAIN	SF_PREDICTED
acrB__b0462__JW0451	ybgC__b0736__JW0726	SF_UNCERTAIN	SF_UNCERTAIN
acrB__b0462__JW0451	ybhI__b0770__JW0753	SF_UNCERTAIN	SF_PREDICTED
acrB__b0462__JW0451	ybjJ__b0845__JW0829	SF_UNCERTAIN	SF_PREDICTED
acrB__b0462__JW0451	ycgV__b1202__JW1193	SF_UNCERTAIN	SF_PREDICTED
acrB__b0462__JW0451	ydhO__b1655__JW5270	SF_UNCERTAIN	SF_PREDICTED
acrB__b0462__JW0451	yebQ__b1828__JW5299	SF_UNCERTAIN	SF_PREDICTED
acrB__b0462__JW0451	yegE__b2067__JW2052	SF_UNCERTAIN	SF_PREDICTED
acrB__b0462__JW0451	yfbJ__b2258__JW5373	SF_UNCERTAIN	SF_CORE
acrB__b0462__JW0451	yfbS__b2292__JW2289	SF_UNCERTAIN	SF_PREDICTED
acrB__b0462__JW0451	yfdI__b2352__JW5382	SF_UNCERTAIN	SF_PREDICTED
acrB__b0462__JW0451	yfeO__b2389__JW2386	SF_UNCERTAIN	SF_PREDICTED
acrB__b0462__JW0451	yfiB__b2605__JW2586	SF_UNCERTAIN	SF_PREDICTED
acrB__b0462__JW0451	ygeR__b2865__JW2833	SF_UNCERTAIN	SF_UNCERTAIN
acrB__b0462__JW0451	yggU__b2953__JW5479	SF_UNCERTAIN	SF_PREDICTED
acrB__b0462__JW0451	yhbT__b3157__JW3126	SF_UNCERTAIN	SF_UNCERTAIN
acrB__b0462__JW0451	yhjE__b3523__JW3491	SF_UNCERTAIN	SF_PREDICTED
acrB__b0462__JW0451	yhjV__b3539__JW3508	SF_UNCERTAIN	SF_PREDICTED
acrB__b0462__JW0451	yibH__b3597__JW3571	SF_UNCERTAIN	SF_UNCERTAIN
acrB__b0462__JW0451	yihP__b3877__JW3848	SF_UNCERTAIN	SF_UNCERTAIN
acrB__b0462__JW0451	yjbF__b4027__JW5711	SF_UNCERTAIN	SF_PREDICTED
acrB__b0462__JW0451	yjeP__b4159__JW4120	SF_UNCERTAIN	SF_PREDICTED
acrB__b0462__JW0451	yjhA__b4311__JW5778	SF_UNCERTAIN	SF_PREDICTED
acrB__b0462__JW0451	ynbE__b1382__JW1377	SF_UNCERTAIN	SF_PREDICTED
acrB__b0462__JW0451	ypjA__b2647__JW5422	SF_UNCERTAIN	SF_UNCERTAIN
acrB__b0462__JW0451	yqcE__b2775__JW2746	SF_UNCERTAIN	SF_PREDICTED
acrB__b0462__JW0451	ytfN__b4221__JW4180	SF_UNCERTAIN	SF_PREDICTED
acrD__b2470__JW2454	ackA__b2296__JW2293	SF_UNCERTAIN	SF_UNCERTAIN
acrD__b2470__JW2454	acpT__b3475__JW3440	SF_UNCERTAIN	MF_CORE
acrD__b2470__JW2454	amiC__b2817__JW5449	SF_UNCERTAIN	SF_CORE
acrD__b2470__JW2454	ansB__b2957__JW2924	SF_UNCERTAIN	SF_UNCERTAIN
acrD__b2470__JW2454	avtA__b3572__JW5652	SF_UNCERTAIN	SF_CORE
acrD__b2470__JW2454	bcr__b2182__JW5363	SF_UNCERTAIN	SF_PREDICTED
acrD__b2470__JW2454	bcsC__b3530__JW5942	SF_UNCERTAIN	SF_CORE
acrD__b2470__JW2454	btuB__b3966__JW3938	SF_UNCERTAIN	SF_UNCERTAIN
acrD__b2470__JW2454	btuD__b1709__JW1699	SF_UNCERTAIN	SF_UNCERTAIN
acrD__b2470__JW2454	caiE__b0035__JW5004	SF_UNCERTAIN	SF_UNCERTAIN
acrD__b2470__JW2454	ccmE__b2197__JW2185	SF_UNCERTAIN	SF_UNCERTAIN
acrD__b2470__JW2454	cfa__b1661__JW1653	SF_UNCERTAIN	SF_CORE
acrD__b2470__JW2454	cheA__b1888__JW1877	SF_UNCERTAIN	SF_UNCERTAIN
acrD__b2470__JW2454	cheW__b1887__JW1876	SF_UNCERTAIN	SF_UNCERTAIN
acrD__b2470__JW2454	cheZ__b1881__JW1870	SF_UNCERTAIN	SF_UNCERTAIN
acrD__b2470__JW2454	chiA__b3338__JW3300	SF_UNCERTAIN	SF_UNCERTAIN
acrD__b2470__JW2454	cirA__b2155__JW2142	SF_UNCERTAIN	SF_UNCERTAIN
acrD__b2470__JW2454	cpsB__b2049__JW2034	SF_UNCERTAIN	SF_CORE
acrD__b2470__JW2454	crcB__b0624__JW0619	SF_UNCERTAIN	SF_UNCERTAIN
acrD__b2470__JW2454	cusA__b0575__JW0564	SF_UNCERTAIN	SF_UNCERTAIN
acrD__b2470__JW2454	cusB__b0574__JW0563	SF_UNCERTAIN	SF_UNCERTAIN
acrD__b2470__JW2454	dcrB__b3472__JW5682	SF_UNCERTAIN	SF_UNCERTAIN
acrD__b2470__JW2454	dppA__b3544__JW3513	SF_UNCERTAIN	SF_CORE
acrD__b2470__JW2454	dppB__b3543__JW3512	SF_UNCERTAIN	SF_CORE
acrD__b2470__JW2454	dsbA__b3860__JW3832	SF_UNCERTAIN	SF_CORE
acrD__b2470__JW2454	dxs__b0420__JW0410	SF_UNCERTAIN	SF_CORE
acrD__b2470__JW2454	ecnB__b4411__JW4108	SF_UNCERTAIN	SF_UNCERTAIN
acrD__b2470__JW2454	emrK__b2368__JW2365	SF_UNCERTAIN	SF_UNCERTAIN
acrD__b2470__JW2454	entC__b0593__JW0585	SF_UNCERTAIN	SF_CORE
acrD__b2470__JW2454	envC__b3613__JW5646	SF_UNCERTAIN	SF_CORE
acrD__b2470__JW2454	fabA__b0954__JW0937	SF_UNCERTAIN	SF_CORE
acrD__b2470__JW2454	fabG__b1093__JW1079	SF_UNCERTAIN	SF_CORE
acrD__b2470__JW2454	fabR__b3963__JW3935	SF_UNCERTAIN	SF_CORE
acrD__b2470__JW2454	fadA__b3845__JW5578	SF_UNCERTAIN	SF_CORE
acrD__b2470__JW2454	fadD__b1805__JW1794	SF_UNCERTAIN	SF_CORE
acrD__b2470__JW2454	fecD__b4288__JW4248	SF_UNCERTAIN	SF_UNCERTAIN
acrD__b2470__JW2454	fepE__b0587__JW0579	SF_UNCERTAIN	SF_CORE
acrD__b2470__JW2454	ffh__b2610__JW5414	SF_UNCERTAIN	SF_CORE
acrD__b2470__JW2454	fhuE__b1102__JW1088	SF_UNCERTAIN	SF_UNCERTAIN
acrD__b2470__JW2454	fimD__b4317__JW5780	SF_UNCERTAIN	SF_UNCERTAIN
acrD__b2470__JW2454	folE__b2153__JW2140	SF_UNCERTAIN	SF_UNCERTAIN
acrD__b2470__JW2454	folM__b1606__JW1598	SF_UNCERTAIN	SF_UNCERTAIN
acrD__b2470__JW2454	frdA__b4154__JW4115	SF_UNCERTAIN	SF_UNCERTAIN
acrD__b2470__JW2454	ftsA__b0094__JW0092	SF_UNCERTAIN	MF_CORE
acrD__b2470__JW2454	ftsH__b3178__JW3145	SF_UNCERTAIN	MF_CORE
acrD__b2470__JW2454	galE__b0759__JW0742	SF_UNCERTAIN	MF_CORE
acrD__b2470__JW2454	galF__b2042__JW2027	SF_UNCERTAIN	MF_CORE
acrD__b2470__JW2454	gidB__b3740__JW3718	SF_UNCERTAIN	SF_UNCERTAIN
acrD__b2470__JW2454	glpQ__b2239__JW2233	SF_UNCERTAIN	SF_CORE
acrD__b2470__JW2454	glpT__b2240__JW2234	SF_UNCERTAIN	SF_CORE
acrD__b2470__JW2454	gspF__b3327__JW3289	SF_UNCERTAIN	SF_UNCERTAIN
acrD__b2470__JW2454	gspM__b3334__JW5704	SF_UNCERTAIN	SF_UNCERTAIN
acrD__b2470__JW2454	hemY__b3802__JW3774	SF_UNCERTAIN	SF_UNCERTAIN
acrD__b2470__JW2454	hflC__b4175__JW4133	SF_UNCERTAIN	MF_CORE
acrD__b2470__JW2454	hflX__b4173__JW4131	SF_UNCERTAIN	SF_UNCERTAIN
acrD__b2470__JW2454	hlpA__b0178__JW0173	SF_UNCERTAIN	MF_CORE
acrD__b2470__JW2454	ispE__b1208__JW1199	SF_UNCERTAIN	SF_CORE
acrD__b2470__JW2454	ispF__b2746__JW2716	SF_UNCERTAIN	SF_CORE
acrD__b2470__JW2454	ispU__b0174__JW0169	SF_UNCERTAIN	MF_CORE
acrD__b2470__JW2454	kdsB__b0918__JW0901	SF_UNCERTAIN	SF_CORE
acrD__b2470__JW2454	lepA__b2569__JW2553	SF_UNCERTAIN	SF_UNCERTAIN
acrD__b2470__JW2454	lolA__b0891__JW0874	SF_UNCERTAIN	MF_CORE
acrD__b2470__JW2454	lolD__b1117__JW5162	SF_UNCERTAIN	SF_CORE
acrD__b2470__JW2454	lpxH__b0524__JW0513	SF_UNCERTAIN	SF_CORE
acrD__b2470__JW2454	mdlB__b0449__JW5061	SF_UNCERTAIN	SF_UNCERTAIN
acrD__b2470__JW2454	mdoC__b1047__JW1034	SF_UNCERTAIN	SF_CORE
acrD__b2470__JW2454	mdoH__b1049__JW1037	SF_UNCERTAIN	SF_CORE
acrD__b2470__JW2454	mdtA__b2074__JW5338	SF_UNCERTAIN	SF_UNCERTAIN
acrD__b2470__JW2454	mdtI__b1599__JW1591	SF_UNCERTAIN	SF_UNCERTAIN
acrD__b2470__JW2454	mdtJ__b1600__JW1592	SF_UNCERTAIN	SF_UNCERTAIN
acrD__b2470__JW2454	mdtK__b1663__JW1655	SF_UNCERTAIN	SF_UNCERTAIN
acrD__b2470__JW2454	mdtL__b3710__JW3688	SF_UNCERTAIN	SF_UNCERTAIN
acrD__b2470__JW2454	metK__b2942__JW2909	SF_UNCERTAIN	SF_UNCERTAIN
acrD__b2470__JW2454	minC__b1176__JW1165	SF_UNCERTAIN	SF_CORE
acrD__b2470__JW2454	mreC__b3250__JW3219	SF_UNCERTAIN	MF_CORE
acrD__b2470__JW2454	mtr__b3161__JW3130	SF_UNCERTAIN	SF_UNCERTAIN
acrD__b2470__JW2454	mukB__b0924__JW0907	SF_UNCERTAIN	MF_CORE
acrD__b2470__JW2454	murF__b0086__JW0084	SF_UNCERTAIN	SF_CORE
acrD__b2470__JW2454	murI__b3967__JW5550	SF_UNCERTAIN	SF_CORE
acrD__b2470__JW2454	nanE__b3223__JW3192	SF_UNCERTAIN	SF_UNCERTAIN
acrD__b2470__JW2454	nudD__b2051__JW5335	SF_UNCERTAIN	MF_UNCERTAIN
acrD__b2470__JW2454	ompX__b0814__JW0799	SF_UNCERTAIN	SF_UNCERTAIN
acrD__b2470__JW2454	oppF__b1247__JW1239	SF_UNCERTAIN	MF_CORE
acrD__b2470__JW2454	osmY__b4376__JW4338	SF_UNCERTAIN	SF_CORE
acrD__b2470__JW2454	paaA__b1388__JW1383	SF_UNCERTAIN	SF_CORE
acrD__b2470__JW2454	paaB__b1389__JW1384	SF_UNCERTAIN	SF_CORE
acrD__b2470__JW2454	paaE__b1392__JW1387	SF_UNCERTAIN	SF_CORE
acrD__b2470__JW2454	paaH__b1395__JW1390	SF_UNCERTAIN	SF_CORE
acrD__b2470__JW2454	panF__b3258__JW3226	SF_UNCERTAIN	SF_UNCERTAIN
acrD__b2470__JW2454	parE__b3030__JW2998	SF_UNCERTAIN	SF_UNCERTAIN
acrD__b2470__JW2454	pbpC__b2519__JW2503	SF_UNCERTAIN	SF_CORE
acrD__b2470__JW2454	pldB__b3825__JW5584	SF_UNCERTAIN	SF_CORE
acrD__b2470__JW2454	ppiD__b0441__JW0431	SF_UNCERTAIN	MF_CORE
acrD__b2470__JW2454	rfaB__b3628__JW3603	SF_UNCERTAIN	SF_CORE
acrD__b2470__JW2454	rfaI__b3627__JW3602	SF_UNCERTAIN	SF_CORE
acrD__b2470__JW2454	rfaS__b3629__JW3604	SF_UNCERTAIN	SF_UNCERTAIN
acrD__b2470__JW2454	rfbA__b2039__JW2024	SF_UNCERTAIN	SF_CORE
acrD__b2470__JW2454	rfbB__b2041__JW2026	SF_UNCERTAIN	SF_CORE
acrD__b2470__JW2454	rffA__b3791__JW3765	SF_UNCERTAIN	SF_CORE
acrD__b2470__JW2454	rhsE__b1456__JW1451	SF_UNCERTAIN	SF_PREDICTED
acrD__b2470__JW2454	rlpA__b0633__JW0628	SF_UNCERTAIN	SF_PREDICTED
acrD__b2470__JW2454	sfmD__b0532__JW0521	SF_UNCERTAIN	SF_UNCERTAIN
acrD__b2470__JW2454	smpA__b2617__JW2598	SF_UNCERTAIN	SF_CORE
acrD__b2470__JW2454	spy__b1743__JW1732	SF_UNCERTAIN	SF_UNCERTAIN
acrD__b2470__JW2454	sugE__b4148__JW5738	SF_UNCERTAIN	SF_UNCERTAIN
acrD__b2470__JW2454	tolA__b0739__JW0729	SF_UNCERTAIN	SF_CORE
acrD__b2470__JW2454	tolB__b0740__JW5100	SF_UNCERTAIN	SF_CORE
acrD__b2470__JW2454	tolR__b0738__JW0728	SF_UNCERTAIN	SF_CORE
acrD__b2470__JW2454	tsx__b0411__JW0401	SF_UNCERTAIN	SF_UNCERTAIN
acrD__b2470__JW2454	ttk__b3641__JW5641	SF_UNCERTAIN	MF_CORE
acrD__b2470__JW2454	ubiF__b0662__JW0659	SF_UNCERTAIN	SF_UNCERTAIN
acrD__b2470__JW2454	ugd__b2028__JW2010	SF_UNCERTAIN	MF_CORE
acrD__b2470__JW2454	ugpA__b3452__JW3417	SF_UNCERTAIN	SF_CORE
acrD__b2470__JW2454	ugpC__b3450__JW3415	SF_UNCERTAIN	SF_CORE
acrD__b2470__JW2454	ugpE__b3451__JW3416	SF_UNCERTAIN	SF_CORE
acrD__b2470__JW2454	uidC__b1615__JW1607	SF_UNCERTAIN	SF_PREDICTED
acrD__b2470__JW2454	vacJ__b2346__JW2343	SF_UNCERTAIN	SF_CORE
acrD__b2470__JW2454	wbbH__b2035__JW2020	SF_UNCERTAIN	SF_CORE
acrD__b2470__JW2454	wbbI__b2034__JW2019	SF_UNCERTAIN	SF_CORE
acrD__b2470__JW2454	wcaF__b2054__JW2039	SF_UNCERTAIN	SF_UNCERTAIN
acrD__b2470__JW2454	wcaL__b2044__JW2029	SF_UNCERTAIN	SF_UNCERTAIN
acrD__b2470__JW2454	wzxE__b3792__JW3766	SF_UNCERTAIN	MF_CORE
acrD__b2470__JW2454	xerD__b2894__JW2862	SF_UNCERTAIN	MF_CORE
acrD__b2470__JW2454	yaaU__b0045__JW0044	SF_UNCERTAIN	SF_PREDICTED
acrD__b2470__JW2454	yahF__b0320__JW0312	SF_UNCERTAIN	SF_UNCERTAIN
acrD__b2470__JW2454	yaiT__b0371__JW0362	SF_UNCERTAIN	SF_PREDICTED
acrD__b2470__JW2454	yajG__b0434__JW0424	SF_UNCERTAIN	SF_PREDICTED
acrD__b2470__JW2454	yajR__b0427__JW5059	SF_UNCERTAIN	SF_PREDICTED
acrD__b2470__JW2454	ybaL__b0478__JW0467	SF_UNCERTAIN	SF_PREDICTED
acrD__b2470__JW2454	ybaT__b0486__JW0475	SF_UNCERTAIN	SF_PREDICTED
acrD__b2470__JW2454	ybfN__b0682__JW0668	SF_UNCERTAIN	SF_PREDICTED
acrD__b2470__JW2454	ybfO__b0703__JW0692	SF_UNCERTAIN	SF_UNCERTAIN
acrD__b2470__JW2454	ybgC__b0736__JW0726	SF_UNCERTAIN	SF_UNCERTAIN
acrD__b2470__JW2454	ybgF__b0742__JW0732	SF_UNCERTAIN	SF_UNCERTAIN
acrD__b2470__JW2454	ybgH__b0709__JW0699	SF_UNCERTAIN	SF_PREDICTED
acrD__b2470__JW2454	ybgQ__b0718__JW5099	SF_UNCERTAIN	SF_UNCERTAIN
acrD__b2470__JW2454	ybiR__b0818__JW0802	SF_UNCERTAIN	SF_PREDICTED
acrD__b2470__JW2454	ybjG__b0841__JW5112	SF_UNCERTAIN	MF_CORE
acrD__b2470__JW2454	ybjJ__b0845__JW0829	SF_UNCERTAIN	SF_PREDICTED
acrD__b2470__JW2454	ycdQ__b1022__JW1007	SF_UNCERTAIN	SF_UNCERTAIN
acrD__b2470__JW2454	ycfN__b1106__JW1092	SF_UNCERTAIN	SF_UNCERTAIN
acrD__b2470__JW2454	ydeA__b1528__JW1521	SF_UNCERTAIN	SF_PREDICTED
acrD__b2470__JW2454	ydeK__b1510__JW1503	SF_UNCERTAIN	SF_PREDICTED
acrD__b2470__JW2454	ydfJ__b1543__JW1536	SF_UNCERTAIN	SF_PREDICTED
acrD__b2470__JW2454	ydiN__b1691__JW5274	SF_UNCERTAIN	SF_PREDICTED
acrD__b2470__JW2454	ydjE__b1769__JW1758	SF_UNCERTAIN	SF_PREDICTED
acrD__b2470__JW2454	ydjK__b1775__JW5290	SF_UNCERTAIN	SF_PREDICTED
acrD__b2470__JW2454	yedE__b1929__JW1914	SF_UNCERTAIN	SF_PREDICTED
acrD__b2470__JW2454	yeeF__b2014__JW5330	SF_UNCERTAIN	SF_PREDICTED
acrD__b2470__JW2454	yeeO__b1985__JW1965	SF_UNCERTAIN	SF_PREDICTED
acrD__b2470__JW2454	yegT__b2098__JW2085	SF_UNCERTAIN	SF_PREDICTED
acrD__b2470__JW2454	yehB__b2109__JW2096	SF_UNCERTAIN	SF_PREDICTED
acrD__b2470__JW2454	yfaV__b2246__JW2240	SF_UNCERTAIN	SF_PREDICTED
acrD__b2470__JW2454	yfaW__b2247__JW2241	SF_UNCERTAIN	SF_UNCERTAIN
acrD__b2470__JW2454	yfbG__b2255__JW2249	SF_UNCERTAIN	SF_CORE
acrD__b2470__JW2454	yfbJ__b2258__JW5373	SF_UNCERTAIN	SF_CORE
acrD__b2470__JW2454	yfbS__b2292__JW2289	SF_UNCERTAIN	SF_PREDICTED
acrD__b2470__JW2454	yfcJ__b2322__JW2319	SF_UNCERTAIN	SF_PREDICTED
acrD__b2470__JW2454	yfcU__b2338__JW2335	SF_UNCERTAIN	SF_PREDICTED
acrD__b2470__JW2454	yfdG__b2350__JW2346	SF_UNCERTAIN	SF_UNCERTAIN
acrD__b2470__JW2454	yfdI__b2352__JW5382	SF_UNCERTAIN	SF_PREDICTED
acrD__b2470__JW2454	yfeN__b2408__JW2399	SF_UNCERTAIN	SF_PREDICTED
acrD__b2470__JW2454	yfeO__b2389__JW2386	SF_UNCERTAIN	SF_PREDICTED
acrD__b2470__JW2454	yfhM__b2520__JW2504	SF_UNCERTAIN	MF_PREDICTED
acrD__b2470__JW2454	ygcS__b2771__JW5845	SF_UNCERTAIN	SF_PREDICTED
acrD__b2470__JW2454	ygeR__b2865__JW2833	SF_UNCERTAIN	SF_UNCERTAIN
acrD__b2470__JW2454	ygfQ__b2884__JW5467	SF_UNCERTAIN	SF_PREDICTED
acrD__b2470__JW2454	ygfU__b2888__JW5470	SF_UNCERTAIN	SF_PREDICTED
acrD__b2470__JW2454	yggU__b2953__JW5479	SF_UNCERTAIN	SF_PREDICTED
acrD__b2470__JW2454	ygjI__b3078__JW5512	SF_UNCERTAIN	SF_PREDICTED
acrD__b2470__JW2454	yhaO__b3110__JW5519	SF_UNCERTAIN	SF_PREDICTED
acrD__b2470__JW2454	yhbT__b3157__JW3126	SF_UNCERTAIN	SF_UNCERTAIN
acrD__b2470__JW2454	yhcD__b3216__JW3183	SF_UNCERTAIN	SF_PREDICTED
acrD__b2470__JW2454	yhfT__b3377__JW3340	SF_UNCERTAIN	SF_PREDICTED
acrD__b2470__JW2454	yhgE__b3402__JW3365	SF_UNCERTAIN	SF_PREDICTED
acrD__b2470__JW2454	yhiI__b3487__JW3454	SF_UNCERTAIN	SF_PREDICTED
acrD__b2470__JW2454	yhiM__b3491__JW5944	SF_UNCERTAIN	SF_PREDICTED
acrD__b2470__JW2454	yhiP__b3496__JW3463	SF_UNCERTAIN	SF_PREDICTED
acrD__b2470__JW2454	yhjE__b3523__JW3491	SF_UNCERTAIN	SF_PREDICTED
acrD__b2470__JW2454	yhjX__b3547__JW3516	SF_UNCERTAIN	SF_PREDICTED
acrD__b2470__JW2454	yhjY__b3548__JW5659	SF_UNCERTAIN	SF_PREDICTED
acrD__b2470__JW2454	yiaT__b3584__JW3556	SF_UNCERTAIN	SF_PREDICTED
acrD__b2470__JW2454	yibD__b3615__JW3590	SF_UNCERTAIN	SF_UNCERTAIN
acrD__b2470__JW2454	yibH__b3597__JW3571	SF_UNCERTAIN	SF_UNCERTAIN
acrD__b2470__JW2454	yicJ__b3657__JW5939	SF_UNCERTAIN	SF_PREDICTED
acrD__b2470__JW2454	yidC__b3705__JW3683	SF_UNCERTAIN	SF_CORE
acrD__b2470__JW2454	yidE__b3685__JW3662	SF_UNCERTAIN	SF_PREDICTED
acrD__b2470__JW2454	yidK__b3679__JW3655	SF_UNCERTAIN	SF_UNCERTAIN
acrD__b2470__JW2454	yiiD__b3888__JW3859	SF_UNCERTAIN	SF_UNCERTAIN
acrD__b2470__JW2454	yjcD__b4064__JW4025	SF_UNCERTAIN	SF_PREDICTED
acrD__b2470__JW2454	yjhA__b4311__JW5778	SF_UNCERTAIN	SF_PREDICTED
acrD__b2470__JW2454	yjhB__b4279__JW5768	SF_UNCERTAIN	SF_PREDICTED
acrD__b2470__JW2454	yjiJ__b4332__JW4295	SF_UNCERTAIN	SF_PREDICTED
acrD__b2470__JW2454	yjiO__b4337__JW4300	SF_UNCERTAIN	SF_UNCERTAIN
acrD__b2470__JW2454	yjiZ__b4356__JW4319	SF_UNCERTAIN	SF_PREDICTED
acrD__b2470__JW2454	ylbH__b0499__JW0488	SF_UNCERTAIN	SF_UNCERTAIN
acrD__b2470__JW2454	ymcA__b0984__JW0967	SF_UNCERTAIN	SF_PREDICTED
acrD__b2470__JW2454	ynbE__b1382__JW1377	SF_UNCERTAIN	SF_PREDICTED
acrD__b2470__JW2454	yncD__b1451__JW1446	SF_UNCERTAIN	SF_PREDICTED
acrD__b2470__JW2454	ypdA__b2380__JW5388	SF_UNCERTAIN	SF_PREDICTED
acrD__b2470__JW2454	ypjA__b2647__JW5422	SF_UNCERTAIN	SF_UNCERTAIN
acrD__b2470__JW2454	yqhH__b3014__JW2982	SF_UNCERTAIN	SF_PREDICTED
acrD__b2470__JW2454	yrbK__b3199__JW3166	SF_UNCERTAIN	SF_CORE
acrD__b2470__JW2454	ytfF__b4210__JW4168	SF_UNCERTAIN	SF_PREDICTED
acrD__b2470__JW2454	ytfN__b4221__JW4180	SF_UNCERTAIN	SF_PREDICTED
acrE__b3265__JW3233	agaS__b3136__JW3105	SF_UNCERTAIN	SF_UNCERTAIN
acrE__b3265__JW3233	amiA__b2435__JW2428	SF_UNCERTAIN	SF_CORE
acrE__b3265__JW3233	cheB__b1883__JW1872	SF_UNCERTAIN	SF_UNCERTAIN
acrE__b3265__JW3233	ftsE__b3463__JW3428	SF_UNCERTAIN	SF_CORE
acrE__b3265__JW3233	ftsH__b3178__JW3145	SF_UNCERTAIN	MF_CORE
acrE__b3265__JW3233	mtr__b3161__JW3130	SF_UNCERTAIN	SF_UNCERTAIN
acrE__b3265__JW3233	pal__b0741__JW0731	SF_UNCERTAIN	SF_CORE
acrE__b3265__JW3233	plsC__b3018__JW2986	SF_UNCERTAIN	SF_CORE
acrE__b3265__JW3233	prc__b1830__JW1819	SF_UNCERTAIN	MF_CORE
acrE__b3265__JW3233	rpmA__b3185__JW3152	SF_UNCERTAIN	SF_UNCERTAIN
acrE__b3265__JW3233	spoT__b3650__JW3625	SF_UNCERTAIN	SF_UNCERTAIN
acrE__b3265__JW3233	ubiB__b3835__JW3812	SF_UNCERTAIN	SF_UNCERTAIN
acrE__b3265__JW3233	ugd__b2028__JW2010	SF_UNCERTAIN	MF_CORE
acrE__b3265__JW3233	ybjG__b0841__JW5112	SF_UNCERTAIN	MF_CORE
acrE__b3265__JW3233	yceK__b1050__JW5151	SF_UNCERTAIN	SF_PREDICTED
acrE__b3265__JW3233	ydcO__b1433__JW5229	SF_UNCERTAIN	SF_PREDICTED
acrE__b3265__JW3233	ydgI__b1605__JW1597	SF_UNCERTAIN	SF_PREDICTED
acrE__b3265__JW3233	yfeO__b2389__JW2386	SF_UNCERTAIN	SF_PREDICTED
acrE__b3265__JW3233	ygbN__b2740__JW2710	SF_UNCERTAIN	SF_PREDICTED
acrE__b3265__JW3233	yjeM__b4156__JW5739	SF_UNCERTAIN	SF_PREDICTED
acrE__b3265__JW3233	yrbK__b3199__JW3166	SF_UNCERTAIN	SF_CORE
acrF__b3266__JW3234	alr__b4053__JW4013	SF_UNCERTAIN	SF_CORE
acrF__b3266__JW3234	amiA__b2435__JW2428	SF_UNCERTAIN	SF_CORE
acrF__b3266__JW3234	ansB__b2957__JW2924	SF_UNCERTAIN	SF_UNCERTAIN
acrF__b3266__JW3234	chiA__b3338__JW3300	SF_UNCERTAIN	SF_UNCERTAIN
acrF__b3266__JW3234	coaD__b3634__JW3609	SF_UNCERTAIN	SF_CORE
acrF__b3266__JW3234	ddg__b2378__JW2375	SF_UNCERTAIN	SF_CORE
acrF__b3266__JW3234	dppD__b3541__JW3510	SF_UNCERTAIN	SF_CORE
acrF__b3266__JW3234	emtA__b1193__JW5821	SF_UNCERTAIN	MF_CORE
acrF__b3266__JW3234	ftsA__b0094__JW0092	SF_UNCERTAIN	MF_CORE
acrF__b3266__JW3234	ftsE__b3463__JW3428	SF_UNCERTAIN	SF_CORE
acrF__b3266__JW3234	ftsH__b3178__JW3145	SF_UNCERTAIN	MF_CORE
acrF__b3266__JW3234	ftsY__b3464__JW3429	SF_UNCERTAIN	SF_CORE
acrF__b3266__JW3234	gspA__b3323__JW3285	SF_UNCERTAIN	SF_UNCERTAIN
acrF__b3266__JW3234	gspF__b3327__JW3289	SF_UNCERTAIN	SF_UNCERTAIN
acrF__b3266__JW3234	htrE__b0139__JW0135	SF_UNCERTAIN	SF_PREDICTED
acrF__b3266__JW3234	htrL__b3618__JW5644	SF_UNCERTAIN	SF_UNCERTAIN
acrF__b3266__JW3234	lpxH__b0524__JW0513	SF_UNCERTAIN	SF_CORE
acrF__b3266__JW3234	mtr__b3161__JW3130	SF_UNCERTAIN	SF_UNCERTAIN
acrF__b3266__JW3234	ompA__b0957__JW0940	SF_UNCERTAIN	SF_CORE
acrF__b3266__JW3234	ompX__b0814__JW0799	SF_UNCERTAIN	SF_UNCERTAIN
acrF__b3266__JW3234	pppA__b2972__JW2939	SF_UNCERTAIN	SF_UNCERTAIN
acrF__b3266__JW3234	prc__b1830__JW1819	SF_UNCERTAIN	MF_CORE
acrF__b3266__JW3234	rfaG__b3631__JW3606	SF_UNCERTAIN	SF_CORE
acrF__b3266__JW3234	rfaJ__b3626__JW3601	SF_UNCERTAIN	SF_CORE
acrF__b3266__JW3234	spoT__b3650__JW3625	SF_UNCERTAIN	SF_UNCERTAIN
acrF__b3266__JW3234	tonB__b1252__JW5195	SF_UNCERTAIN	SF_CORE
acrF__b3266__JW3234	ubiX__b2311__JW2308	SF_UNCERTAIN	SF_UNCERTAIN
acrF__b3266__JW3234	wbbK__b2032__JW2017	SF_UNCERTAIN	SF_PREDICTED
acrF__b3266__JW3234	wcaE__b2055__JW2040	SF_UNCERTAIN	SF_UNCERTAIN
acrF__b3266__JW3234	yaaU__b0045__JW0044	SF_UNCERTAIN	SF_PREDICTED
acrF__b3266__JW3234	yaeT__b0177__JW0172	SF_UNCERTAIN	SF_CORE
acrF__b3266__JW3234	yaiO__b0358__JW0349	SF_UNCERTAIN	SF_UNCERTAIN
acrF__b3266__JW3234	yceK__b1050__JW5151	SF_UNCERTAIN	SF_PREDICTED
acrF__b3266__JW3234	yddA__b1496__JW5242	SF_UNCERTAIN	SF_UNCERTAIN
acrF__b3266__JW3234	ydeT__b1505__JW1499	SF_UNCERTAIN	SF_PREDICTED
acrF__b3266__JW3234	ydgI__b1605__JW1597	SF_UNCERTAIN	SF_PREDICTED
acrF__b3266__JW3234	ydhP__b1657__JW1649	SF_UNCERTAIN	SF_PREDICTED
acrF__b3266__JW3234	ydiN__b1691__JW5274	SF_UNCERTAIN	SF_PREDICTED
acrF__b3266__JW3234	yebQ__b1828__JW5299	SF_UNCERTAIN	SF_PREDICTED
acrF__b3266__JW3234	yegE__b2067__JW2052	SF_UNCERTAIN	SF_PREDICTED
acrF__b3266__JW3234	yfcC__b2298__JW2295	SF_UNCERTAIN	SF_PREDICTED
acrF__b3266__JW3234	yfiB__b2605__JW2586	SF_UNCERTAIN	SF_PREDICTED
acrF__b3266__JW3234	yhcD__b3216__JW3183	SF_UNCERTAIN	SF_PREDICTED
acrF__b3266__JW3234	yhgN__b3434__JW3397	SF_UNCERTAIN	SF_PREDICTED
acrF__b3266__JW3234	yhhH__b3483__JW3449	SF_UNCERTAIN	SF_UNCERTAIN
acrF__b3266__JW3234	yhjV__b3539__JW3508	SF_UNCERTAIN	SF_PREDICTED
acrF__b3266__JW3234	yibH__b3597__JW3571	SF_UNCERTAIN	SF_UNCERTAIN
acrF__b3266__JW3234	yidE__b3685__JW3662	SF_UNCERTAIN	SF_PREDICTED
acrF__b3266__JW3234	yihA__b3865__JW5930	SF_UNCERTAIN	SF_UNCERTAIN
acrF__b3266__JW3234	yihN__b3874__JW3845	SF_UNCERTAIN	SF_PREDICTED
acrF__b3266__JW3234	yihP__b3877__JW3848	SF_UNCERTAIN	SF_UNCERTAIN
acrF__b3266__JW3234	yjeM__b4156__JW5739	SF_UNCERTAIN	SF_PREDICTED
acrF__b3266__JW3234	yjgQ__b4262__JW5760	SF_UNCERTAIN	SF_CORE
acrF__b3266__JW3234	yjhA__b4311__JW5778	SF_UNCERTAIN	SF_PREDICTED
acrF__b3266__JW3234	yjhF__b4296__JW4258	SF_UNCERTAIN	SF_PREDICTED
acrF__b3266__JW3234	yjiO__b4337__JW4300	SF_UNCERTAIN	SF_UNCERTAIN
acrF__b3266__JW3234	ytfN__b4221__JW4180	SF_UNCERTAIN	SF_PREDICTED
aidB__b4187__JW5867	ampD__b0110__JW0106	SF_CORE	SF_CORE
aidB__b4187__JW5867	cedA__b1731__JW1720	SF_CORE	SF_UNCERTAIN
aidB__b4187__JW5867	cfa__b1661__JW1653	SF_CORE	SF_CORE
aidB__b4187__JW5867	cpsG__b2048__JW2033	SF_CORE	SF_CORE
aidB__b4187__JW5867	cydA__b0733__JW0722	SF_CORE	SF_UNCERTAIN
aidB__b4187__JW5867	cydC__b0886__JW0869	SF_CORE	SF_UNCERTAIN
aidB__b4187__JW5867	fadA__b3845__JW5578	SF_CORE	SF_CORE
aidB__b4187__JW5867	ispA__b0421__JW0411	SF_CORE	MF_CORE
aidB__b4187__JW5867	kdsB__b0918__JW0901	SF_CORE	SF_CORE
aidB__b4187__JW5867	kdtA__b3633__JW3608	SF_CORE	SF_CORE
aidB__b4187__JW5867	lolA__b0891__JW0874	SF_CORE	MF_CORE
aidB__b4187__JW5867	lpxB__b0182__JW0177	SF_CORE	SF_CORE
aidB__b4187__JW5867	mepA__b2328__JW2325	SF_CORE	SF_CORE
aidB__b4187__JW5867	mpaA__b1326__JW1319	SF_CORE	SF_PREDICTED
aidB__b4187__JW5867	mrcA__b3396__JW3359	SF_CORE	SF_CORE
aidB__b4187__JW5867	nlpE__b0192__JW0188	SF_CORE	SF_UNCERTAIN
aidB__b4187__JW5867	pbpC__b2519__JW2503	SF_CORE	SF_CORE
aidB__b4187__JW5867	pgpA__b0418__JW0408	SF_CORE	SF_CORE
aidB__b4187__JW5867	rffA__b3791__JW3765	SF_CORE	SF_CORE
aidB__b4187__JW5867	yadE__b0130__JW0126	SF_CORE	SF_PREDICTED
aidB__b4187__JW5867	ybjG__b0841__JW5112	SF_CORE	MF_CORE
aidB__b4187__JW5867	ycdQ__b1022__JW1007	SF_CORE	SF_UNCERTAIN
aidB__b4187__JW5867	yohG__b2138__JW5838	SF_CORE	SF_UNCERTAIN
alr__b4053__JW4013	amiC__b2817__JW5449	SF_CORE	SF_CORE
alr__b4053__JW4013	avtA__b3572__JW5652	SF_CORE	SF_CORE
alr__b4053__JW4013	caiT__b0040__JW0039	SF_CORE	SF_CORE
alr__b4053__JW4013	cedA__b1731__JW1720	SF_CORE	SF_UNCERTAIN
alr__b4053__JW4013	dacA__b0632__JW0627	SF_CORE	SF_CORE
alr__b4053__JW4013	ddg__b2378__JW2375	SF_CORE	SF_CORE
alr__b4053__JW4013	dxs__b0420__JW0410	SF_CORE	SF_CORE
alr__b4053__JW4013	fabA__b0954__JW0937	SF_CORE	SF_CORE
alr__b4053__JW4013	fabR__b3963__JW3935	SF_CORE	SF_CORE
alr__b4053__JW4013	fes__b0585__JW0576	SF_CORE	SF_CORE
alr__b4053__JW4013	galE__b0759__JW0742	SF_CORE	MF_CORE
alr__b4053__JW4013	glmM__b3176__JW3143	SF_CORE	MF_CORE
alr__b4053__JW4013	gmd__b2053__JW2038	SF_CORE	SF_CORE
alr__b4053__JW4013	gpsA__b3608__JW3583	SF_CORE	SF_CORE
alr__b4053__JW4013	ispE__b1208__JW1199	SF_CORE	SF_CORE
alr__b4053__JW4013	ispF__b2746__JW2716	SF_CORE	SF_CORE
alr__b4053__JW4013	ispU__b0174__JW0169	SF_CORE	MF_CORE
alr__b4053__JW4013	kdsD__b3197__JW3164	SF_CORE	SF_CORE
alr__b4053__JW4013	lpxL__b1054__JW1041	SF_CORE	SF_CORE
alr__b4053__JW4013	lpxM__b1855__JW1844	SF_CORE	SF_CORE
alr__b4053__JW4013	maoC__b1387__JW1382	SF_CORE	SF_CORE
alr__b4053__JW4013	mraY__b0087__JW0085	SF_CORE	SF_CORE
alr__b4053__JW4013	nlpC__b1708__JW1698	SF_CORE	SF_UNCERTAIN
alr__b4053__JW4013	ompT__b0565__JW0554	SF_CORE	SF_UNCERTAIN
alr__b4053__JW4013	rfaB__b3628__JW3603	SF_CORE	SF_CORE
alr__b4053__JW4013	rfbA__b2039__JW2024	SF_CORE	SF_CORE
alr__b4053__JW4013	rfbC__b2038__JW2023	SF_CORE	SF_CORE
alr__b4053__JW4013	rfbX__b2037__JW2022	SF_CORE	SF_CORE
alr__b4053__JW4013	rffH__b3789__JW3763	SF_CORE	SF_CORE
alr__b4053__JW4013	spr__b2175__JW2163	SF_CORE	SF_UNCERTAIN
alr__b4053__JW4013	sulA__b0958__JW0941	SF_CORE	SF_CORE
alr__b4053__JW4013	tolC__b3035__JW5503	SF_CORE	MF_CORE
alr__b4053__JW4013	ttk__b3641__JW5641	SF_CORE	MF_CORE
alr__b4053__JW4013	wbbK__b2032__JW2017	SF_CORE	SF_PREDICTED
alr__b4053__JW4013	wcaK__b2045__JW2030	SF_CORE	SF_UNCERTAIN
alr__b4053__JW4013	wza__b2062__JW2047	SF_CORE	MF_CORE
alr__b4053__JW4013	wzxC__b2046__JW2031	SF_CORE	SF_CORE
alr__b4053__JW4013	wzxE__b3792__JW3766	SF_CORE	MF_CORE
alr__b4053__JW4013	yeaV__b1801__JW5293	SF_CORE	SF_PREDICTED
alr__b4053__JW4013	yfbF__b2254__JW2248	SF_CORE	SF_CORE
alr__b4053__JW4013	yfbJ__b2258__JW5373	SF_CORE	SF_CORE
alr__b4053__JW4013	yfhM__b2520__JW2504	SF_CORE	MF_PREDICTED
alr__b4053__JW4013	yhbN__b3200__JW3167	SF_CORE	SF_CORE
alr__b4053__JW4013	ynaI__b1330__JW1323	SF_CORE	SF_PREDICTED
alr__b4053__JW4013	ypdA__b2380__JW5388	SF_CORE	SF_PREDICTED
amiA__b2435__JW2428	acpT__b3475__JW3440	SF_CORE	MF_CORE
amiA__b2435__JW2428	ansB__b2957__JW2924	SF_CORE	SF_UNCERTAIN
amiA__b2435__JW2428	bglH__b3720__JW3698	SF_CORE	SF_PREDICTED
amiA__b2435__JW2428	chiA__b3338__JW3300	SF_CORE	SF_UNCERTAIN
amiA__b2435__JW2428	cpxP__b3913__JW5558	SF_CORE	SF_CORE
amiA__b2435__JW2428	crcB__b0624__JW0619	SF_CORE	SF_UNCERTAIN
amiA__b2435__JW2428	dcrB__b3472__JW5682	SF_CORE	SF_UNCERTAIN
amiA__b2435__JW2428	dppA__b3544__JW3513	SF_CORE	SF_CORE
amiA__b2435__JW2428	dppB__b3543__JW3512	SF_CORE	SF_CORE
amiA__b2435__JW2428	dppD__b3541__JW3510	SF_CORE	SF_CORE
amiA__b2435__JW2428	fepE__b0587__JW0579	SF_CORE	SF_CORE
amiA__b2435__JW2428	fes__b0585__JW0576	SF_CORE	SF_CORE
amiA__b2435__JW2428	fhuC__b0151__JW0147	SF_CORE	SF_UNCERTAIN
amiA__b2435__JW2428	ftsE__b3463__JW3428	SF_CORE	SF_CORE
amiA__b2435__JW2428	ftsL__b0083__JW0081	SF_CORE	SF_CORE
amiA__b2435__JW2428	gidB__b3740__JW3718	SF_CORE	SF_UNCERTAIN
amiA__b2435__JW2428	glf__b2036__JW2021	SF_CORE	SF_CORE
amiA__b2435__JW2428	glpT__b2240__JW2234	SF_CORE	SF_CORE
amiA__b2435__JW2428	groL__b4143__JW4103	SF_CORE	SF_CORE
amiA__b2435__JW2428	gspA__b3323__JW3285	SF_CORE	SF_UNCERTAIN
amiA__b2435__JW2428	hlpA__b0178__JW0173	SF_CORE	MF_CORE
amiA__b2435__JW2428	hsrA__b3754__JW3733	SF_CORE	SF_PREDICTED
amiA__b2435__JW2428	lepA__b2569__JW2553	SF_CORE	SF_UNCERTAIN
amiA__b2435__JW2428	lpxL__b1054__JW1041	SF_CORE	SF_CORE
amiA__b2435__JW2428	mdlA__b0448__JW0438	SF_CORE	SF_UNCERTAIN
amiA__b2435__JW2428	mdtI__b1599__JW1591	SF_CORE	SF_UNCERTAIN
amiA__b2435__JW2428	motA__b1890__JW1879	SF_CORE	SF_UNCERTAIN
amiA__b2435__JW2428	mraY__b0087__JW0085	SF_CORE	SF_CORE
amiA__b2435__JW2428	mtr__b3161__JW3130	SF_CORE	SF_UNCERTAIN
amiA__b2435__JW2428	nanE__b3223__JW3192	SF_CORE	SF_UNCERTAIN
amiA__b2435__JW2428	nanK__b3222__JW5538	SF_CORE	SF_UNCERTAIN
amiA__b2435__JW2428	napD__b2207__JW2195	SF_CORE	SF_UNCERTAIN
amiA__b2435__JW2428	nlpC__b1708__JW1698	SF_CORE	SF_UNCERTAIN
amiA__b2435__JW2428	ompG__b1319__JW1312	SF_CORE	SF_UNCERTAIN
amiA__b2435__JW2428	oppD__b1246__JW1238	SF_CORE	MF_CORE
amiA__b2435__JW2428	paaH__b1395__JW1390	SF_CORE	SF_CORE
amiA__b2435__JW2428	pabB__b1812__JW1801	SF_CORE	SF_UNCERTAIN
amiA__b2435__JW2428	pabC__b1096__JW1082	SF_CORE	SF_UNCERTAIN
amiA__b2435__JW2428	panF__b3258__JW3226	SF_CORE	SF_UNCERTAIN
amiA__b2435__JW2428	parE__b3030__JW2998	SF_CORE	SF_UNCERTAIN
amiA__b2435__JW2428	prc__b1830__JW1819	SF_CORE	MF_CORE
amiA__b2435__JW2428	rfbB__b2041__JW2026	SF_CORE	SF_CORE
amiA__b2435__JW2428	rhsE__b1456__JW1451	SF_CORE	SF_PREDICTED
amiA__b2435__JW2428	rplW__b3318__JW3280	SF_CORE	SF_UNCERTAIN
amiA__b2435__JW2428	rpmA__b3185__JW3152	SF_CORE	SF_UNCERTAIN
amiA__b2435__JW2428	sugE__b4148__JW5738	SF_CORE	SF_UNCERTAIN
amiA__b2435__JW2428	tolA__b0739__JW0729	SF_CORE	SF_CORE
amiA__b2435__JW2428	ugpA__b3452__JW3417	SF_CORE	SF_CORE
amiA__b2435__JW2428	ugpB__b3453__JW3418	SF_CORE	SF_CORE
amiA__b2435__JW2428	ugpE__b3451__JW3416	SF_CORE	SF_CORE
amiA__b2435__JW2428	vacJ__b2346__JW2343	SF_CORE	SF_CORE
amiA__b2435__JW2428	wbbI__b2034__JW2019	SF_CORE	SF_CORE
amiA__b2435__JW2428	wcaE__b2055__JW2040	SF_CORE	SF_UNCERTAIN
amiA__b2435__JW2428	wcaF__b2054__JW2039	SF_CORE	SF_UNCERTAIN
amiA__b2435__JW2428	xerC__b3811__JW3784	SF_CORE	MF_CORE
amiA__b2435__JW2428	yaiT__b0371__JW0362	SF_CORE	SF_PREDICTED
amiA__b2435__JW2428	ybfO__b0703__JW0692	SF_CORE	SF_UNCERTAIN
amiA__b2435__JW2428	ybiR__b0818__JW0802	SF_CORE	SF_PREDICTED
amiA__b2435__JW2428	ycfN__b1106__JW1092	SF_CORE	SF_UNCERTAIN
amiA__b2435__JW2428	yddA__b1496__JW5242	SF_CORE	SF_UNCERTAIN
amiA__b2435__JW2428	ydeA__b1528__JW1521	SF_CORE	SF_PREDICTED
amiA__b2435__JW2428	ydeT__b1505__JW1499	SF_CORE	SF_PREDICTED
amiA__b2435__JW2428	yeaN__b1791__JW1780	SF_CORE	SF_PREDICTED
amiA__b2435__JW2428	yfaV__b2246__JW2240	SF_CORE	SF_PREDICTED
amiA__b2435__JW2428	yfcJ__b2322__JW2319	SF_CORE	SF_PREDICTED
amiA__b2435__JW2428	yfcU__b2338__JW2335	SF_CORE	SF_PREDICTED
amiA__b2435__JW2428	yfdI__b2352__JW5382	SF_CORE	SF_PREDICTED
amiA__b2435__JW2428	yfeO__b2389__JW2386	SF_CORE	SF_PREDICTED
amiA__b2435__JW2428	ygbN__b2740__JW2710	SF_CORE	SF_PREDICTED
amiA__b2435__JW2428	ygfQ__b2884__JW5467	SF_CORE	SF_PREDICTED
amiA__b2435__JW2428	ygfU__b2888__JW5470	SF_CORE	SF_PREDICTED
amiA__b2435__JW2428	ygjJ__b3079__JW3050	SF_CORE	SF_PREDICTED
amiA__b2435__JW2428	yhaO__b3110__JW5519	SF_CORE	SF_PREDICTED
amiA__b2435__JW2428	yhbT__b3157__JW3126	SF_CORE	SF_UNCERTAIN
amiA__b2435__JW2428	yhcD__b3216__JW3183	SF_CORE	SF_PREDICTED
amiA__b2435__JW2428	yhfK__b3358__JW5701	SF_CORE	SF_PREDICTED
amiA__b2435__JW2428	yhfT__b3377__JW3340	SF_CORE	SF_PREDICTED
amiA__b2435__JW2428	yhgE__b3402__JW3365	SF_CORE	SF_PREDICTED
amiA__b2435__JW2428	yhiM__b3491__JW5944	SF_CORE	SF_PREDICTED
amiA__b2435__JW2428	yhjE__b3523__JW3491	SF_CORE	SF_PREDICTED
amiA__b2435__JW2428	yhjX__b3547__JW3516	SF_CORE	SF_PREDICTED
amiA__b2435__JW2428	yhjY__b3548__JW5659	SF_CORE	SF_PREDICTED
amiA__b2435__JW2428	yiaT__b3584__JW3556	SF_CORE	SF_PREDICTED
amiA__b2435__JW2428	yibD__b3615__JW3590	SF_CORE	SF_UNCERTAIN
amiA__b2435__JW2428	yibH__b3597__JW3571	SF_CORE	SF_UNCERTAIN
amiA__b2435__JW2428	yicJ__b3657__JW5939	SF_CORE	SF_PREDICTED
amiA__b2435__JW2428	yidE__b3685__JW3662	SF_CORE	SF_PREDICTED
amiA__b2435__JW2428	yidK__b3679__JW3655	SF_CORE	SF_UNCERTAIN
amiA__b2435__JW2428	yieG__b3714__JW3692	SF_CORE	SF_PREDICTED
amiA__b2435__JW2428	yihN__b3874__JW3845	SF_CORE	SF_PREDICTED
amiA__b2435__JW2428	yjdL__b4130__JW4091	SF_CORE	SF_PREDICTED
amiA__b2435__JW2428	yjeM__b4156__JW5739	SF_CORE	SF_PREDICTED
amiA__b2435__JW2428	yjhA__b4311__JW5778	SF_CORE	SF_PREDICTED
amiA__b2435__JW2428	yjiJ__b4332__JW4295	SF_CORE	SF_PREDICTED
amiA__b2435__JW2428	yjiO__b4337__JW4300	SF_CORE	SF_UNCERTAIN
amiA__b2435__JW2428	ylbH__b0499__JW0488	SF_CORE	SF_UNCERTAIN
amiA__b2435__JW2428	ymcA__b0984__JW0967	SF_CORE	SF_PREDICTED
amiA__b2435__JW2428	yncD__b1451__JW1446	SF_CORE	SF_PREDICTED
amiA__b2435__JW2428	ypjA__b2647__JW5422	SF_CORE	SF_UNCERTAIN
amiA__b2435__JW2428	yqhH__b3014__JW2982	SF_CORE	SF_PREDICTED
amiA__b2435__JW2428	ytfN__b4221__JW4180	SF_CORE	SF_PREDICTED
amiB__b4169__JW4127	agaS__b3136__JW3105	SF_CORE	SF_UNCERTAIN
amiB__b4169__JW4127	ansB__b2957__JW2924	SF_CORE	SF_UNCERTAIN
amiB__b4169__JW4127	dppD__b3541__JW3510	SF_CORE	SF_CORE
amiB__b4169__JW4127	dsbG__b0604__JW0597	SF_CORE	SF_CORE
amiB__b4169__JW4127	dut__b3640__JW3615	SF_CORE	SF_CORE
amiB__b4169__JW4127	iscS__b2530__JW2514	SF_CORE	SF_UNCERTAIN
amiB__b4169__JW4127	lepA__b2569__JW2553	SF_CORE	SF_UNCERTAIN
amiB__b4169__JW4127	mreB__b3251__JW3220	SF_CORE	MF_CORE
amiB__b4169__JW4127	oppF__b1247__JW1239	SF_CORE	MF_CORE
amiB__b4169__JW4127	panF__b3258__JW3226	SF_CORE	SF_UNCERTAIN
amiB__b4169__JW4127	pbpC__b2519__JW2503	SF_CORE	SF_CORE
amiB__b4169__JW4127	tatC__b3839__JW3815	SF_CORE	SF_CORE
amiB__b4169__JW4127	tolA__b0739__JW0729	SF_CORE	SF_CORE
amiB__b4169__JW4127	ugpC__b3450__JW3415	SF_CORE	SF_CORE
amiB__b4169__JW4127	ugpE__b3451__JW3416	SF_CORE	SF_CORE
amiB__b4169__JW4127	wbbJ__b2033__JW2018	SF_CORE	SF_PREDICTED
amiB__b4169__JW4127	ybbY__b0513__JW0501	SF_CORE	SF_PREDICTED
amiB__b4169__JW4127	yceK__b1050__JW5151	SF_CORE	SF_PREDICTED
amiB__b4169__JW4127	ydcO__b1433__JW5229	SF_CORE	SF_PREDICTED
amiB__b4169__JW4127	yddA__b1496__JW5242	SF_CORE	SF_UNCERTAIN
amiB__b4169__JW4127	yddW__b1491__JW1486	SF_CORE	SF_PREDICTED
amiB__b4169__JW4127	ydeA__b1528__JW1521	SF_CORE	SF_PREDICTED
amiB__b4169__JW4127	ydeT__b1505__JW1499	SF_CORE	SF_PREDICTED
amiB__b4169__JW4127	yfbS__b2292__JW2289	SF_CORE	SF_PREDICTED
amiB__b4169__JW4127	yhiI__b3487__JW3454	SF_CORE	SF_PREDICTED
amiB__b4169__JW4127	yhjE__b3523__JW3491	SF_CORE	SF_PREDICTED
amiB__b4169__JW4127	yibH__b3597__JW3571	SF_CORE	SF_UNCERTAIN
amiB__b4169__JW4127	yicJ__b3657__JW5939	SF_CORE	SF_PREDICTED
amiB__b4169__JW4127	yihN__b3874__JW3845	SF_CORE	SF_PREDICTED
amiB__b4169__JW4127	yjbF__b4027__JW5711	SF_CORE	SF_PREDICTED
amiB__b4169__JW4127	yjcD__b4064__JW4025	SF_CORE	SF_PREDICTED
amiB__b4169__JW4127	yjcE__b4065__JW4026	SF_CORE	SF_UNCERTAIN
amiB__b4169__JW4127	ynbE__b1382__JW1377	SF_CORE	SF_PREDICTED
amiB__b4169__JW4127	ytfF__b4210__JW4168	SF_CORE	SF_PREDICTED
amiB__b4169__JW4127	ytfN__b4221__JW4180	SF_CORE	SF_PREDICTED
amiC__b2817__JW5449	cheW__b1887__JW1876	SF_CORE	SF_UNCERTAIN
amiC__b2817__JW5449	cydC__b0886__JW0869	SF_CORE	SF_UNCERTAIN
amiC__b2817__JW5449	lolA__b0891__JW0874	SF_CORE	MF_CORE
amiC__b2817__JW5449	mpaA__b1326__JW1319	SF_CORE	SF_PREDICTED
amiC__b2817__JW5449	pal__b0741__JW0731	SF_CORE	SF_CORE
amiC__b2817__JW5449	pgpB__b1278__JW1270	SF_CORE	MF_CORE
amiC__b2817__JW5449	prc__b1830__JW1819	SF_CORE	MF_CORE
amiC__b2817__JW5449	ugd__b2028__JW2010	SF_CORE	MF_CORE
ampC__b4150__JW4111	agaS__b3136__JW3105	SF_CORE	SF_UNCERTAIN
ampC__b4150__JW4111	cusA__b0575__JW0564	SF_CORE	SF_UNCERTAIN
ampC__b4150__JW4111	envC__b3613__JW5646	SF_CORE	SF_CORE
ampC__b4150__JW4111	gmd__b2053__JW2038	SF_CORE	SF_CORE
ampC__b4150__JW4111	gspA__b3323__JW3285	SF_CORE	SF_UNCERTAIN
ampC__b4150__JW4111	prc__b1830__JW1819	SF_CORE	MF_CORE
ampC__b4150__JW4111	rplW__b3318__JW3280	SF_CORE	SF_UNCERTAIN
ampC__b4150__JW4111	ugpC__b3450__JW3415	SF_CORE	SF_CORE
ampC__b4150__JW4111	yfbS__b2292__JW2289	SF_CORE	SF_PREDICTED
ampC__b4150__JW4111	yfeO__b2389__JW2386	SF_CORE	SF_PREDICTED
ampC__b4150__JW4111	yfgH__b2505__JW5400	SF_CORE	SF_PREDICTED
ampC__b4150__JW4111	yhjE__b3523__JW3491	SF_CORE	SF_PREDICTED
ampC__b4150__JW4111	yibH__b3597__JW3571	SF_CORE	SF_UNCERTAIN
ampC__b4150__JW4111	yjbF__b4027__JW5711	SF_CORE	SF_PREDICTED
ampC__b4150__JW4111	ypjA__b2647__JW5422	SF_CORE	SF_UNCERTAIN
ampD__b0110__JW0106	chiA__b3338__JW3300	SF_CORE	SF_UNCERTAIN
ampD__b0110__JW0106	dppD__b3541__JW3510	SF_CORE	SF_CORE
ampD__b0110__JW0106	dsbG__b0604__JW0597	SF_CORE	SF_CORE
ampD__b0110__JW0106	fimD__b4317__JW5780	SF_CORE	SF_UNCERTAIN
ampD__b0110__JW0106	gspA__b3323__JW3285	SF_CORE	SF_UNCERTAIN
ampD__b0110__JW0106	lepA__b2569__JW2553	SF_CORE	SF_UNCERTAIN
ampD__b0110__JW0106	yddA__b1496__JW5242	SF_CORE	SF_UNCERTAIN
ampD__b0110__JW0106	ydeA__b1528__JW1521	SF_CORE	SF_PREDICTED
ampD__b0110__JW0106	ydgI__b1605__JW1597	SF_CORE	SF_PREDICTED
ampD__b0110__JW0106	yfeO__b2389__JW2386	SF_CORE	SF_PREDICTED
ampD__b0110__JW0106	yhjE__b3523__JW3491	SF_CORE	SF_PREDICTED
ampD__b0110__JW0106	yhjV__b3539__JW3508	SF_CORE	SF_PREDICTED
ampD__b0110__JW0106	yieG__b3714__JW3692	SF_CORE	SF_PREDICTED
ampD__b0110__JW0106	yihP__b3877__JW3848	SF_CORE	SF_UNCERTAIN
ampD__b0110__JW0106	yjbF__b4027__JW5711	SF_CORE	SF_PREDICTED
ampD__b0110__JW0106	yjcD__b4064__JW4025	SF_CORE	SF_PREDICTED
ampD__b0110__JW0106	yjeM__b4156__JW5739	SF_CORE	SF_PREDICTED
ampD__b0110__JW0106	yjeP__b4159__JW4120	SF_CORE	SF_PREDICTED
ampD__b0110__JW0106	ytfN__b4221__JW4180	SF_CORE	SF_PREDICTED
ampG__b0433__JW0423	chiA__b3338__JW3300	SF_CORE	SF_UNCERTAIN
ampG__b0433__JW0423	cusA__b0575__JW0564	SF_CORE	SF_UNCERTAIN
ampG__b0433__JW0423	dppD__b3541__JW3510	SF_CORE	SF_CORE
ampG__b0433__JW0423	envC__b3613__JW5646	SF_CORE	SF_CORE
ampG__b0433__JW0423	fimD__b4317__JW5780	SF_CORE	SF_UNCERTAIN
ampG__b0433__JW0423	ftsY__b3464__JW3429	SF_CORE	SF_CORE
ampG__b0433__JW0423	mdtK__b1663__JW1655	SF_CORE	SF_UNCERTAIN
ampG__b0433__JW0423	oppC__b1245__JW1237	SF_CORE	MF_CORE
ampG__b0433__JW0423	uidC__b1615__JW1607	SF_CORE	SF_PREDICTED
ampG__b0433__JW0423	ycgV__b1202__JW1193	SF_CORE	SF_PREDICTED
ampG__b0433__JW0423	yddW__b1491__JW1486	SF_CORE	SF_PREDICTED
ampG__b0433__JW0423	ydeT__b1505__JW1499	SF_CORE	SF_PREDICTED
ampG__b0433__JW0423	yhjE__b3523__JW3491	SF_CORE	SF_PREDICTED
ampG__b0433__JW0423	yhjV__b3539__JW3508	SF_CORE	SF_PREDICTED
ampG__b0433__JW0423	yihP__b3877__JW3848	SF_CORE	SF_UNCERTAIN
ampG__b0433__JW0423	yjeM__b4156__JW5739	SF_CORE	SF_PREDICTED
ampG__b0433__JW0423	ytfN__b4221__JW4180	SF_CORE	SF_PREDICTED
ampH__b0376__JW5052	cpxP__b3913__JW5558	SF_CORE	SF_CORE
ampH__b0376__JW5052	dppD__b3541__JW3510	SF_CORE	SF_CORE
ampH__b0376__JW5052	gspA__b3323__JW3285	SF_CORE	SF_UNCERTAIN
ampH__b0376__JW5052	lepA__b2569__JW2553	SF_CORE	SF_UNCERTAIN
ampH__b0376__JW5052	mdlB__b0449__JW5061	SF_CORE	SF_UNCERTAIN
ampH__b0376__JW5052	ugpE__b3451__JW3416	SF_CORE	SF_CORE
ampH__b0376__JW5052	yajG__b0434__JW0424	SF_CORE	SF_PREDICTED
ampH__b0376__JW5052	ybbY__b0513__JW0501	SF_CORE	SF_PREDICTED
ampH__b0376__JW5052	ybfM__b0681__JW0667	SF_CORE	SF_PREDICTED
ampH__b0376__JW5052	yfcJ__b2322__JW2319	SF_CORE	SF_PREDICTED
ampH__b0376__JW5052	yfdH__b2351__JW2347	SF_CORE	SF_UNCERTAIN
ampH__b0376__JW5052	yfeH__b2410__JW5876	SF_CORE	SF_PREDICTED
ampH__b0376__JW5052	yfeO__b2389__JW2386	SF_CORE	SF_PREDICTED
ampH__b0376__JW5052	yhjE__b3523__JW3491	SF_CORE	SF_PREDICTED
ampH__b0376__JW5052	yieG__b3714__JW3692	SF_CORE	SF_PREDICTED
ampH__b0376__JW5052	yihN__b3874__JW3845	SF_CORE	SF_PREDICTED
ampH__b0376__JW5052	yjbF__b4027__JW5711	SF_CORE	SF_PREDICTED
ampH__b0376__JW5052	yjcD__b4064__JW4025	SF_CORE	SF_PREDICTED
ampH__b0376__JW5052	yjeM__b4156__JW5739	SF_CORE	SF_PREDICTED
ampH__b0376__JW5052	yqhH__b3014__JW2982	SF_CORE	SF_PREDICTED
ampH__b0376__JW5052	ytfN__b4221__JW4180	SF_CORE	SF_PREDICTED
arcB__b3210__JW5536	ackA__b2296__JW2293	SF_UNCERTAIN	SF_UNCERTAIN
arcB__b3210__JW5536	acrA__b0463__JW0452	SF_UNCERTAIN	SF_UNCERTAIN
arcB__b3210__JW5536	acrD__b2470__JW2454	SF_UNCERTAIN	SF_UNCERTAIN
arcB__b3210__JW5536	acrE__b3265__JW3233	SF_UNCERTAIN	SF_UNCERTAIN
arcB__b3210__JW5536	acrF__b3266__JW3234	SF_UNCERTAIN	SF_UNCERTAIN
arcB__b3210__JW5536	alr__b4053__JW4013	SF_UNCERTAIN	SF_CORE
arcB__b3210__JW5536	ampG__b0433__JW0423	SF_UNCERTAIN	SF_CORE
arcB__b3210__JW5536	avtA__b3572__JW5652	SF_UNCERTAIN	SF_CORE
arcB__b3210__JW5536	bcr__b2182__JW5363	SF_UNCERTAIN	SF_PREDICTED
arcB__b3210__JW5536	betT__b0314__JW0306	SF_UNCERTAIN	SF_CORE
arcB__b3210__JW5536	bglH__b3720__JW3698	SF_UNCERTAIN	SF_PREDICTED
arcB__b3210__JW5536	blr__b4409__JW5963	SF_UNCERTAIN	SF_UNCERTAIN
arcB__b3210__JW5536	cld__b2027__JW5836	SF_UNCERTAIN	SF_CORE
arcB__b3210__JW5536	coaE__b0103__JW0100	SF_UNCERTAIN	SF_CORE
arcB__b3210__JW5536	cpsB__b2049__JW2034	SF_UNCERTAIN	SF_CORE
arcB__b3210__JW5536	cpsG__b2048__JW2033	SF_UNCERTAIN	SF_CORE
arcB__b3210__JW5536	cydC__b0886__JW0869	SF_UNCERTAIN	SF_UNCERTAIN
arcB__b3210__JW5536	dcrB__b3472__JW5682	SF_UNCERTAIN	SF_UNCERTAIN
arcB__b3210__JW5536	dut__b3640__JW3615	SF_UNCERTAIN	SF_CORE
arcB__b3210__JW5536	ecnB__b4411__JW4108	SF_UNCERTAIN	SF_UNCERTAIN
arcB__b3210__JW5536	eno__b2779__JW2750	SF_UNCERTAIN	SF_UNCERTAIN
arcB__b3210__JW5536	exbB__b3006__JW2974	SF_UNCERTAIN	SF_CORE
arcB__b3210__JW5536	fadL__b2344__JW2341	SF_UNCERTAIN	SF_CORE
arcB__b3210__JW5536	fecA__b4291__JW4251	SF_UNCERTAIN	SF_UNCERTAIN
arcB__b3210__JW5536	fecC__b4289__JW4249	SF_UNCERTAIN	SF_UNCERTAIN
arcB__b3210__JW5536	fes__b0585__JW0576	SF_UNCERTAIN	SF_CORE
arcB__b3210__JW5536	ffh__b2610__JW5414	SF_UNCERTAIN	SF_CORE
arcB__b3210__JW5536	fhuC__b0151__JW0147	SF_UNCERTAIN	SF_UNCERTAIN
arcB__b3210__JW5536	frdB__b4153__JW4114	SF_UNCERTAIN	SF_UNCERTAIN
arcB__b3210__JW5536	frdD__b4151__JW4112	SF_UNCERTAIN	SF_UNCERTAIN
arcB__b3210__JW5536	ftsL__b0083__JW0081	SF_UNCERTAIN	SF_CORE
arcB__b3210__JW5536	galF__b2042__JW2027	SF_UNCERTAIN	MF_CORE
arcB__b3210__JW5536	galT__b0758__JW0741	SF_UNCERTAIN	MF_CORE
arcB__b3210__JW5536	glgB__b3432__JW3395	SF_UNCERTAIN	SF_UNCERTAIN
arcB__b3210__JW5536	gmd__b2053__JW2038	SF_UNCERTAIN	SF_CORE
arcB__b3210__JW5536	gspE__b3326__JW3288	SF_UNCERTAIN	SF_UNCERTAIN
arcB__b3210__JW5536	gspH__b3329__JW3291	SF_UNCERTAIN	SF_UNCERTAIN
arcB__b3210__JW5536	gspK__b3332__JW3294	SF_UNCERTAIN	SF_UNCERTAIN
arcB__b3210__JW5536	ldcA__b1192__JW1181	SF_UNCERTAIN	SF_CORE
arcB__b3210__JW5536	lepA__b2569__JW2553	SF_UNCERTAIN	SF_UNCERTAIN
arcB__b3210__JW5536	lpxA__b0181__JW0176	SF_UNCERTAIN	SF_CORE
arcB__b3210__JW5536	maoC__b1387__JW1382	SF_UNCERTAIN	SF_CORE
arcB__b3210__JW5536	mdtE__b3513__JW3481	SF_UNCERTAIN	SF_UNCERTAIN
arcB__b3210__JW5536	mdtF__b3514__JW3482	SF_UNCERTAIN	SF_UNCERTAIN
arcB__b3210__JW5536	mdtI__b1599__JW1591	SF_UNCERTAIN	SF_UNCERTAIN
arcB__b3210__JW5536	mdtJ__b1600__JW1592	SF_UNCERTAIN	SF_UNCERTAIN
arcB__b3210__JW5536	minD__b1175__JW1164	SF_UNCERTAIN	SF_CORE
arcB__b3210__JW5536	mltA__b2813__JW2784	SF_UNCERTAIN	MF_CORE
arcB__b3210__JW5536	mscS__b2924__JW2891	SF_UNCERTAIN	SF_UNCERTAIN
arcB__b3210__JW5536	murB__b3972__JW3940	SF_UNCERTAIN	SF_CORE
arcB__b3210__JW5536	ompL__b3875__JW3846	SF_UNCERTAIN	SF_UNCERTAIN
arcB__b3210__JW5536	ompN__b1377__JW1371	SF_UNCERTAIN	SF_UNCERTAIN
arcB__b3210__JW5536	osmB__b1283__JW1275	SF_UNCERTAIN	SF_CORE
arcB__b3210__JW5536	paaB__b1389__JW1384	SF_UNCERTAIN	SF_CORE
arcB__b3210__JW5536	paaD__b1391__JW5217	SF_UNCERTAIN	SF_CORE
arcB__b3210__JW5536	paaF__b1393__JW1388	SF_UNCERTAIN	SF_CORE
arcB__b3210__JW5536	paaH__b1395__JW1390	SF_UNCERTAIN	SF_CORE
arcB__b3210__JW5536	panD__b0131__JW0127	SF_UNCERTAIN	SF_CORE
arcB__b3210__JW5536	panE__b0425__JW0415	SF_UNCERTAIN	SF_CORE
arcB__b3210__JW5536	pbpC__b2519__JW2503	SF_UNCERTAIN	SF_CORE
arcB__b3210__JW5536	pgpA__b0418__JW0408	SF_UNCERTAIN	SF_CORE
arcB__b3210__JW5536	pgsA__b1912__JW1897	SF_UNCERTAIN	SF_CORE
arcB__b3210__JW5536	pldA__b3821__JW3794	SF_UNCERTAIN	MF_UNCERTAIN
arcB__b3210__JW5536	plsC__b3018__JW2986	SF_UNCERTAIN	SF_CORE
arcB__b3210__JW5536	ppiD__b0441__JW0431	SF_UNCERTAIN	MF_CORE
arcB__b3210__JW5536	pppA__b2972__JW2939	SF_UNCERTAIN	SF_UNCERTAIN
arcB__b3210__JW5536	rfaB__b3628__JW3603	SF_UNCERTAIN	SF_CORE
arcB__b3210__JW5536	rfaY__b3625__JW3600	SF_UNCERTAIN	SF_CORE
arcB__b3210__JW5536	rfbC__b2038__JW2023	SF_UNCERTAIN	SF_CORE
arcB__b3210__JW5536	rfe__b3784__JW3758	SF_UNCERTAIN	SF_CORE
arcB__b3210__JW5536	rffA__b3791__JW3765	SF_UNCERTAIN	SF_CORE
arcB__b3210__JW5536	rffE__b3786__JW5600	SF_UNCERTAIN	SF_CORE
arcB__b3210__JW5536	rffH__b3789__JW3763	SF_UNCERTAIN	SF_CORE
arcB__b3210__JW5536	rffM__b3794__JW3770	SF_UNCERTAIN	SF_CORE
arcB__b3210__JW5536	rssA__b1234__JW1222	SF_UNCERTAIN	SF_UNCERTAIN
arcB__b3210__JW5536	secB__b3609__JW3584	SF_UNCERTAIN	MF_CORE
arcB__b3210__JW5536	sfmD__b0532__JW0521	SF_UNCERTAIN	SF_UNCERTAIN
arcB__b3210__JW5536	smpA__b2617__JW2598	SF_UNCERTAIN	SF_CORE
arcB__b3210__JW5536	sohA__b3129__JW3098	SF_UNCERTAIN	SF_UNCERTAIN
arcB__b3210__JW5536	spoT__b3650__JW3625	SF_UNCERTAIN	SF_UNCERTAIN
arcB__b3210__JW5536	tatE__b0627__JW0622	SF_UNCERTAIN	SF_CORE
arcB__b3210__JW5536	trg__b1421__JW1417	SF_UNCERTAIN	SF_UNCERTAIN
arcB__b3210__JW5536	tsx__b0411__JW0401	SF_UNCERTAIN	SF_UNCERTAIN
arcB__b3210__JW5536	ubiX__b2311__JW2308	SF_UNCERTAIN	SF_UNCERTAIN
arcB__b3210__JW5536	ugd__b2028__JW2010	SF_UNCERTAIN	MF_CORE
arcB__b3210__JW5536	ugpB__b3453__JW3418	SF_UNCERTAIN	SF_CORE
arcB__b3210__JW5536	ugpC__b3450__JW3415	SF_UNCERTAIN	SF_CORE
arcB__b3210__JW5536	wcaF__b2054__JW2039	SF_UNCERTAIN	SF_UNCERTAIN
arcB__b3210__JW5536	wcaL__b2044__JW2029	SF_UNCERTAIN	SF_UNCERTAIN
arcB__b3210__JW5536	wzxC__b2046__JW2031	SF_UNCERTAIN	SF_CORE
arcB__b3210__JW5536	wzxE__b3792__JW3766	SF_UNCERTAIN	MF_CORE
arcB__b3210__JW5536	yaaU__b0045__JW0044	SF_UNCERTAIN	SF_PREDICTED
arcB__b3210__JW5536	yaiO__b0358__JW0349	SF_UNCERTAIN	SF_UNCERTAIN
arcB__b3210__JW5536	yaiT__b0371__JW0362	SF_UNCERTAIN	SF_PREDICTED
arcB__b3210__JW5536	yaiU__b0374__JW5051	SF_UNCERTAIN	SF_PREDICTED
arcB__b3210__JW5536	yajG__b0434__JW0424	SF_UNCERTAIN	SF_PREDICTED
arcB__b3210__JW5536	yajR__b0427__JW5059	SF_UNCERTAIN	SF_PREDICTED
arcB__b3210__JW5536	ybbW__b0511__JW0499	SF_UNCERTAIN	SF_PREDICTED
arcB__b3210__JW5536	ybgP__b0717__JW0707	SF_UNCERTAIN	MF_UNCERTAIN
arcB__b3210__JW5536	ybiR__b0818__JW0802	SF_UNCERTAIN	SF_PREDICTED
arcB__b3210__JW5536	ybjG__b0841__JW5112	SF_UNCERTAIN	MF_CORE
arcB__b3210__JW5536	ybjJ__b0845__JW0829	SF_UNCERTAIN	SF_PREDICTED
arcB__b3210__JW5536	yceK__b1050__JW5151	SF_UNCERTAIN	SF_PREDICTED
arcB__b3210__JW5536	ycfP__b1108__JW5158	SF_UNCERTAIN	SF_UNCERTAIN
arcB__b3210__JW5536	ycgR__b1194__JW1183	SF_UNCERTAIN	SF_UNCERTAIN
arcB__b3210__JW5536	ydeA__b1528__JW1521	SF_UNCERTAIN	SF_PREDICTED
arcB__b3210__JW5536	ydeT__b1505__JW1499	SF_UNCERTAIN	SF_PREDICTED
arcB__b3210__JW5536	ydhA__b1639__JW1631	SF_UNCERTAIN	SF_PREDICTED
arcB__b3210__JW5536	ydiN__b1691__JW5274	SF_UNCERTAIN	SF_PREDICTED
arcB__b3210__JW5536	ydiY__b1722__JW1711	SF_UNCERTAIN	SF_PREDICTED
arcB__b3210__JW5536	yeaN__b1791__JW1780	SF_UNCERTAIN	SF_PREDICTED
arcB__b3210__JW5536	yebA__b1856__JW5304	SF_UNCERTAIN	MF_UNCERTAIN
arcB__b3210__JW5536	yfaW__b2247__JW2241	SF_UNCERTAIN	SF_UNCERTAIN
arcB__b3210__JW5536	yfbS__b2292__JW2289	SF_UNCERTAIN	SF_PREDICTED
arcB__b3210__JW5536	yfbW__b4544__JW2252	SF_UNCERTAIN	SF_CORE
arcB__b3210__JW5536	yfcC__b2298__JW2295	SF_UNCERTAIN	SF_PREDICTED
arcB__b3210__JW5536	yfcU__b2338__JW2335	SF_UNCERTAIN	SF_PREDICTED
arcB__b3210__JW5536	yfcY__b2342__JW2339	SF_UNCERTAIN	SF_CORE
arcB__b3210__JW5536	yfeH__b2410__JW5876	SF_UNCERTAIN	SF_PREDICTED
arcB__b3210__JW5536	yfgL__b2512__JW2496	SF_UNCERTAIN	SF_CORE
arcB__b3210__JW5536	ygaD__b2700__JW2670	SF_UNCERTAIN	SF_UNCERTAIN
arcB__b3210__JW5536	yhiM__b3491__JW5944	SF_UNCERTAIN	SF_PREDICTED
arcB__b3210__JW5536	yhiP__b3496__JW3463	SF_UNCERTAIN	SF_PREDICTED
arcB__b3210__JW5536	yhjE__b3523__JW3491	SF_UNCERTAIN	SF_PREDICTED
arcB__b3210__JW5536	yhjR__b3535__JW3503	SF_UNCERTAIN	SF_PREDICTED
arcB__b3210__JW5536	yibH__b3597__JW3571	SF_UNCERTAIN	SF_UNCERTAIN
arcB__b3210__JW5536	yieG__b3714__JW3692	SF_UNCERTAIN	SF_PREDICTED
arcB__b3210__JW5536	yihA__b3865__JW5930	SF_UNCERTAIN	SF_UNCERTAIN
arcB__b3210__JW5536	yjcD__b4064__JW4025	SF_UNCERTAIN	SF_PREDICTED
arcB__b3210__JW5536	yjcE__b4065__JW4026	SF_UNCERTAIN	SF_UNCERTAIN
arcB__b3210__JW5536	yjcP__b4080__JW4041	SF_UNCERTAIN	SF_UNCERTAIN
arcB__b3210__JW5536	yjdL__b4130__JW4091	SF_UNCERTAIN	SF_PREDICTED
arcB__b3210__JW5536	yjfM__b4185__JW4143	SF_UNCERTAIN	SF_PREDICTED
arcB__b3210__JW5536	yjhB__b4279__JW5768	SF_UNCERTAIN	SF_PREDICTED
arcB__b3210__JW5536	yncD__b1451__JW1446	SF_UNCERTAIN	SF_PREDICTED
arcB__b3210__JW5536	yqeG__b2845__JW2813	SF_UNCERTAIN	SF_PREDICTED
arnT__b2257__JW2251	emtA__b1193__JW5821	SF_CORE	MF_CORE
arnT__b2257__JW2251	nlpC__b1708__JW1698	SF_CORE	SF_UNCERTAIN
arnT__b2257__JW2251	yaeT__b0177__JW0172	SF_CORE	SF_CORE
asmA__b2064__JW2049	aaeA__b3241__JW3210	SF_UNCERTAIN	SF_PREDICTED
asmA__b2064__JW2049	ackA__b2296__JW2293	SF_UNCERTAIN	SF_UNCERTAIN
asmA__b2064__JW2049	acrB__b0462__JW0451	SF_UNCERTAIN	SF_UNCERTAIN
asmA__b2064__JW2049	chiA__b3338__JW3300	SF_UNCERTAIN	SF_UNCERTAIN
asmA__b2064__JW2049	dacA__b0632__JW0627	SF_UNCERTAIN	SF_CORE
asmA__b2064__JW2049	gspK__b3332__JW3294	SF_UNCERTAIN	SF_UNCERTAIN
asmA__b2064__JW2049	mdtE__b3513__JW3481	SF_UNCERTAIN	SF_UNCERTAIN
asmA__b2064__JW2049	mdtK__b1663__JW1655	SF_UNCERTAIN	SF_UNCERTAIN
asmA__b2064__JW2049	pldA__b3821__JW3794	SF_UNCERTAIN	MF_UNCERTAIN
asmA__b2064__JW2049	pta__b2297__JW2294	SF_UNCERTAIN	SF_UNCERTAIN
asmA__b2064__JW2049	rne__b1084__JW1071	SF_UNCERTAIN	SF_UNCERTAIN
asmA__b2064__JW2049	spoT__b3650__JW3625	SF_UNCERTAIN	SF_UNCERTAIN
asmA__b2064__JW2049	ybaT__b0486__JW0475	SF_UNCERTAIN	SF_PREDICTED
asmA__b2064__JW2049	ybgC__b0736__JW0726	SF_UNCERTAIN	SF_UNCERTAIN
asmA__b2064__JW2049	ydcL__b1431__JW1427	SF_UNCERTAIN	SF_PREDICTED
asmA__b2064__JW2049	yddW__b1491__JW1486	SF_UNCERTAIN	SF_PREDICTED
asmA__b2064__JW2049	ydeA__b1528__JW1521	SF_UNCERTAIN	SF_PREDICTED
asmA__b2064__JW2049	ydgI__b1605__JW1597	SF_UNCERTAIN	SF_PREDICTED
asmA__b2064__JW2049	ydiN__b1691__JW5274	SF_UNCERTAIN	SF_PREDICTED
asmA__b2064__JW2049	yfbS__b2292__JW2289	SF_UNCERTAIN	SF_PREDICTED
asmA__b2064__JW2049	yibH__b3597__JW3571	SF_UNCERTAIN	SF_UNCERTAIN
asmA__b2064__JW2049	yidK__b3679__JW3655	SF_UNCERTAIN	SF_UNCERTAIN
asmA__b2064__JW2049	yihP__b3877__JW3848	SF_UNCERTAIN	SF_UNCERTAIN
asmA__b2064__JW2049	yjeP__b4159__JW4120	SF_UNCERTAIN	SF_PREDICTED
asmA__b2064__JW2049	yjhF__b4296__JW4258	SF_UNCERTAIN	SF_PREDICTED
avtA__b3572__JW5652	cheA__b1888__JW1877	SF_CORE	SF_UNCERTAIN
avtA__b3572__JW5652	cycA__b4208__JW4166	SF_CORE	SF_CORE
avtA__b3572__JW5652	cydC__b0886__JW0869	SF_CORE	SF_UNCERTAIN
avtA__b3572__JW5652	glf__b2036__JW2021	SF_CORE	SF_CORE
avtA__b3572__JW5652	glmM__b3176__JW3143	SF_CORE	MF_CORE
avtA__b3572__JW5652	lpxM__b1855__JW1844	SF_CORE	SF_CORE
avtA__b3572__JW5652	motA__b1890__JW1879	SF_CORE	SF_UNCERTAIN
avtA__b3572__JW5652	ompN__b1377__JW1371	SF_CORE	SF_UNCERTAIN
avtA__b3572__JW5652	pal__b0741__JW0731	SF_CORE	SF_CORE
avtA__b3572__JW5652	ycdQ__b1022__JW1007	SF_CORE	SF_UNCERTAIN
avtA__b3572__JW5652	yfbJ__b2258__JW5373	SF_CORE	SF_CORE
avtA__b3572__JW5652	ynaI__b1330__JW1323	SF_CORE	SF_PREDICTED
avtA__b3572__JW5652	ypdA__b2380__JW5388	SF_CORE	SF_PREDICTED
avtA__b3572__JW5652	yrbK__b3199__JW3166	SF_CORE	SF_CORE
bacA__b3057__JW3029	ansB__b2957__JW2924	MF_CORE	SF_UNCERTAIN
bacA__b3057__JW3029	arcB__b3210__JW5536	MF_CORE	SF_UNCERTAIN
bacA__b3057__JW3029	cheB__b1883__JW1872	MF_CORE	SF_UNCERTAIN
bacA__b3057__JW3029	dut__b3640__JW3615	MF_CORE	SF_CORE
bacA__b3057__JW3029	frdA__b4154__JW4115	MF_CORE	SF_UNCERTAIN
bacA__b3057__JW3029	gspA__b3323__JW3285	MF_CORE	SF_UNCERTAIN
bacA__b3057__JW3029	iscS__b2530__JW2514	MF_CORE	SF_UNCERTAIN
bacA__b3057__JW3029	ldcA__b1192__JW1181	MF_CORE	SF_CORE
bacA__b3057__JW3029	mdlB__b0449__JW5061	MF_CORE	SF_UNCERTAIN
bacA__b3057__JW3029	ompL__b3875__JW3846	MF_CORE	SF_UNCERTAIN
bacA__b3057__JW3029	pppA__b2972__JW2939	MF_CORE	SF_UNCERTAIN
bacA__b3057__JW3029	rplU__b3186__JW3153	MF_CORE	SF_UNCERTAIN
bacA__b3057__JW3029	spoT__b3650__JW3625	MF_CORE	SF_UNCERTAIN
bacA__b3057__JW3029	sugE__b4148__JW5738	MF_CORE	SF_UNCERTAIN
bacA__b3057__JW3029	ubiX__b2311__JW2308	MF_CORE	SF_UNCERTAIN
bacA__b3057__JW3029	yddL__b1472__JW1468	MF_CORE	SF_PREDICTED
bacA__b3057__JW3029	ydgI__b1605__JW1597	MF_CORE	SF_PREDICTED
bacA__b3057__JW3029	yfdI__b2352__JW5382	MF_CORE	SF_PREDICTED
bacA__b3057__JW3029	yfdV__b2372__JW2369	MF_CORE	SF_PREDICTED
bacA__b3057__JW3029	yfeO__b2389__JW2386	MF_CORE	SF_PREDICTED
bacA__b3057__JW3029	yggU__b2953__JW5479	MF_CORE	SF_PREDICTED
bacA__b3057__JW3029	yhgN__b3434__JW3397	MF_CORE	SF_PREDICTED
bacA__b3057__JW3029	yjeM__b4156__JW5739	MF_CORE	SF_PREDICTED
bacA__b3057__JW3029	yjhA__b4311__JW5778	MF_CORE	SF_PREDICTED
bacA__b3057__JW3029	ypjA__b2647__JW5422	MF_CORE	SF_UNCERTAIN
bacA__b3057__JW3029	ytfN__b4221__JW4180	MF_CORE	SF_PREDICTED
bcsA__b3533__JW5665	acpT__b3475__JW3440	SF_CORE	MF_CORE
bcsA__b3533__JW5665	amiA__b2435__JW2428	SF_CORE	SF_CORE
bcsA__b3533__JW5665	ansB__b2957__JW2924	SF_CORE	SF_UNCERTAIN
bcsA__b3533__JW5665	appC__b0978__JW0960	SF_CORE	SF_UNCERTAIN
bcsA__b3533__JW5665	bglH__b3720__JW3698	SF_CORE	SF_PREDICTED
bcsA__b3533__JW5665	cusA__b0575__JW0564	SF_CORE	SF_UNCERTAIN
bcsA__b3533__JW5665	envC__b3613__JW5646	SF_CORE	SF_CORE
bcsA__b3533__JW5665	ftsA__b0094__JW0092	SF_CORE	MF_CORE
bcsA__b3533__JW5665	gspA__b3323__JW3285	SF_CORE	SF_UNCERTAIN
bcsA__b3533__JW5665	hflX__b4173__JW4131	SF_CORE	SF_UNCERTAIN
bcsA__b3533__JW5665	iscS__b2530__JW2514	SF_CORE	SF_UNCERTAIN
bcsA__b3533__JW5665	ompL__b3875__JW3846	SF_CORE	SF_UNCERTAIN
bcsA__b3533__JW5665	ompX__b0814__JW0799	SF_CORE	SF_UNCERTAIN
bcsA__b3533__JW5665	panF__b3258__JW3226	SF_CORE	SF_UNCERTAIN
bcsA__b3533__JW5665	plsC__b3018__JW2986	SF_CORE	SF_CORE
bcsA__b3533__JW5665	rhsA__b3593__JW3566	SF_CORE	SF_PREDICTED
bcsA__b3533__JW5665	spoT__b3650__JW3625	SF_CORE	SF_UNCERTAIN
bcsA__b3533__JW5665	ttk__b3641__JW5641	SF_CORE	MF_CORE
bcsA__b3533__JW5665	wbbH__b2035__JW2020	SF_CORE	SF_CORE
bcsA__b3533__JW5665	wbbI__b2034__JW2019	SF_CORE	SF_CORE
bcsA__b3533__JW5665	wzxC__b2046__JW2031	SF_CORE	SF_CORE
bcsA__b3533__JW5665	ychP__b1220__JW1211	SF_CORE	SF_PREDICTED
bcsA__b3533__JW5665	ydgI__b1605__JW1597	SF_CORE	SF_PREDICTED
bcsA__b3533__JW5665	ydjE__b1769__JW1758	SF_CORE	SF_PREDICTED
bcsA__b3533__JW5665	yfdI__b2352__JW5382	SF_CORE	SF_PREDICTED
bcsA__b3533__JW5665	yfeO__b2389__JW2386	SF_CORE	SF_PREDICTED
bcsA__b3533__JW5665	yhbN__b3200__JW3167	SF_CORE	SF_CORE
bcsA__b3533__JW5665	yhgN__b3434__JW3397	SF_CORE	SF_PREDICTED
bcsA__b3533__JW5665	yhhH__b3483__JW3449	SF_CORE	SF_UNCERTAIN
bcsA__b3533__JW5665	yhiM__b3491__JW5944	SF_CORE	SF_PREDICTED
bcsA__b3533__JW5665	yidE__b3685__JW3662	SF_CORE	SF_PREDICTED
bcsA__b3533__JW5665	yidK__b3679__JW3655	SF_CORE	SF_UNCERTAIN
bcsA__b3533__JW5665	yihA__b3865__JW5930	SF_CORE	SF_UNCERTAIN
bcsA__b3533__JW5665	yihP__b3877__JW3848	SF_CORE	SF_UNCERTAIN
bcsA__b3533__JW5665	yjcR__b4082__JW4043	SF_CORE	SF_UNCERTAIN
bcsA__b3533__JW5665	yjeM__b4156__JW5739	SF_CORE	SF_PREDICTED
bcsA__b3533__JW5665	yjeP__b4159__JW4120	SF_CORE	SF_PREDICTED
bcsA__b3533__JW5665	yjgQ__b4262__JW5760	SF_CORE	SF_CORE
bcsA__b3533__JW5665	yjiJ__b4332__JW4295	SF_CORE	SF_PREDICTED
bcsA__b3533__JW5665	ypjA__b2647__JW5422	SF_CORE	SF_UNCERTAIN
bcsA__b3533__JW5665	yqcE__b2775__JW2746	SF_CORE	SF_PREDICTED
bcsA__b3533__JW5665	ytfN__b4221__JW4180	SF_CORE	SF_PREDICTED
bcsB__b3532__JW3500	ansB__b2957__JW2924	SF_CORE	SF_UNCERTAIN
bcsB__b3532__JW3500	bglH__b3720__JW3698	SF_CORE	SF_PREDICTED
bcsB__b3532__JW3500	chiA__b3338__JW3300	SF_CORE	SF_UNCERTAIN
bcsB__b3532__JW3500	ddg__b2378__JW2375	SF_CORE	SF_CORE
bcsB__b3532__JW3500	dut__b3640__JW3615	SF_CORE	SF_CORE
bcsB__b3532__JW3500	dxs__b0420__JW0410	SF_CORE	SF_CORE
bcsB__b3532__JW3500	gspA__b3323__JW3285	SF_CORE	SF_UNCERTAIN
bcsB__b3532__JW3500	hflX__b4173__JW4131	SF_CORE	SF_UNCERTAIN
bcsB__b3532__JW3500	lpxH__b0524__JW0513	SF_CORE	SF_CORE
bcsB__b3532__JW3500	mdlB__b0449__JW5061	SF_CORE	SF_UNCERTAIN
bcsB__b3532__JW3500	panC__b0133__JW0129	SF_CORE	SF_CORE
bcsB__b3532__JW3500	panF__b3258__JW3226	SF_CORE	SF_UNCERTAIN
bcsB__b3532__JW3500	pldA__b3821__JW3794	SF_CORE	MF_UNCERTAIN
bcsB__b3532__JW3500	rfaC__b3621__JW3596	SF_CORE	SF_CORE
bcsB__b3532__JW3500	rfaY__b3625__JW3600	SF_CORE	SF_CORE
bcsB__b3532__JW3500	rplW__b3318__JW3280	SF_CORE	SF_UNCERTAIN
bcsB__b3532__JW3500	uidC__b1615__JW1607	SF_CORE	SF_PREDICTED
bcsB__b3532__JW3500	wcaM__b2043__JW2028	SF_CORE	SF_UNCERTAIN
bcsB__b3532__JW3500	yaeF__b0193__JW5016	SF_CORE	SF_PREDICTED
bcsB__b3532__JW3500	ybjG__b0841__JW5112	SF_CORE	MF_CORE
bcsB__b3532__JW3500	yebQ__b1828__JW5299	SF_CORE	SF_PREDICTED
bcsB__b3532__JW3500	yfdI__b2352__JW5382	SF_CORE	SF_PREDICTED
bcsB__b3532__JW3500	yfiB__b2605__JW2586	SF_CORE	SF_PREDICTED
bcsB__b3532__JW3500	yhbN__b3200__JW3167	SF_CORE	SF_CORE
bcsB__b3532__JW3500	yhhH__b3483__JW3449	SF_CORE	SF_UNCERTAIN
bcsB__b3532__JW3500	yhhS__b3473__JW5945	SF_CORE	SF_PREDICTED
bcsB__b3532__JW3500	yibH__b3597__JW3571	SF_CORE	SF_UNCERTAIN
bcsB__b3532__JW3500	yidK__b3679__JW3655	SF_CORE	SF_UNCERTAIN
bcsB__b3532__JW3500	yihP__b3877__JW3848	SF_CORE	SF_UNCERTAIN
bcsB__b3532__JW3500	yjcD__b4064__JW4025	SF_CORE	SF_PREDICTED
bcsB__b3532__JW3500	ypjA__b2647__JW5422	SF_CORE	SF_UNCERTAIN
bcsB__b3532__JW3500	yrbK__b3199__JW3166	SF_CORE	SF_CORE
betT__b0314__JW0306	agaS__b3136__JW3105	SF_CORE	SF_UNCERTAIN
betT__b0314__JW0306	cpxP__b3913__JW5558	SF_CORE	SF_CORE
betT__b0314__JW0306	ddpD__b1484__JW1479	SF_CORE	SF_CORE
betT__b0314__JW0306	dppD__b3541__JW3510	SF_CORE	SF_CORE
betT__b0314__JW0306	fecB__b4290__JW4250	SF_CORE	SF_UNCERTAIN
betT__b0314__JW0306	fecC__b4289__JW4249	SF_CORE	SF_UNCERTAIN
betT__b0314__JW0306	motA__b1890__JW1879	SF_CORE	SF_UNCERTAIN
betT__b0314__JW0306	ydcO__b1433__JW5229	SF_CORE	SF_PREDICTED
betT__b0314__JW0306	ydeT__b1505__JW1499	SF_CORE	SF_PREDICTED
betT__b0314__JW0306	ydgI__b1605__JW1597	SF_CORE	SF_PREDICTED
betT__b0314__JW0306	yfeO__b2389__JW2386	SF_CORE	SF_PREDICTED
betT__b0314__JW0306	yhjE__b3523__JW3491	SF_CORE	SF_PREDICTED
betT__b0314__JW0306	yihN__b3874__JW3845	SF_CORE	SF_PREDICTED
betT__b0314__JW0306	yjeM__b4156__JW5739	SF_CORE	SF_PREDICTED
betT__b0314__JW0306	yjhA__b4311__JW5778	SF_CORE	SF_PREDICTED
betT__b0314__JW0306	yraP__b3150__JW3119	SF_CORE	MF_UNCERTAIN
betT__b0314__JW0306	ytfF__b4210__JW4168	SF_CORE	SF_PREDICTED
betT__b0314__JW0306	ytfN__b4221__JW4180	SF_CORE	SF_PREDICTED
birA__b3973__JW3941	cheB__b1883__JW1872	SF_CORE	SF_UNCERTAIN
birA__b3973__JW3941	cusA__b0575__JW0564	SF_CORE	SF_UNCERTAIN
birA__b3973__JW3941	cusB__b0574__JW0563	SF_CORE	SF_UNCERTAIN
birA__b3973__JW3941	cydC__b0886__JW0869	SF_CORE	SF_UNCERTAIN
birA__b3973__JW3941	fimD__b4317__JW5780	SF_CORE	SF_UNCERTAIN
birA__b3973__JW3941	frdA__b4154__JW4115	SF_CORE	SF_UNCERTAIN
birA__b3973__JW3941	glf__b2036__JW2021	SF_CORE	SF_CORE
birA__b3973__JW3941	glmM__b3176__JW3143	SF_CORE	MF_CORE
birA__b3973__JW3941	gpsA__b3608__JW3583	SF_CORE	SF_CORE
birA__b3973__JW3941	gspA__b3323__JW3285	SF_CORE	SF_UNCERTAIN
birA__b3973__JW3941	mdlA__b0448__JW0438	SF_CORE	SF_UNCERTAIN
birA__b3973__JW3941	mdtK__b1663__JW1655	SF_CORE	SF_UNCERTAIN
birA__b3973__JW3941	mdtL__b3710__JW3688	SF_CORE	SF_UNCERTAIN
birA__b3973__JW3941	ompL__b3875__JW3846	SF_CORE	SF_UNCERTAIN
birA__b3973__JW3941	pldA__b3821__JW3794	SF_CORE	MF_UNCERTAIN
birA__b3973__JW3941	prc__b1830__JW1819	SF_CORE	MF_CORE
birA__b3973__JW3941	spoT__b3650__JW3625	SF_CORE	SF_UNCERTAIN
birA__b3973__JW3941	yajR__b0427__JW5059	SF_CORE	SF_PREDICTED
birA__b3973__JW3941	ybjP__b0865__JW0849	SF_CORE	SF_PREDICTED
birA__b3973__JW3941	ycgV__b1202__JW1193	SF_CORE	SF_PREDICTED
birA__b3973__JW3941	ydcO__b1433__JW5229	SF_CORE	SF_PREDICTED
birA__b3973__JW3941	ydeK__b1510__JW1503	SF_CORE	SF_PREDICTED
birA__b3973__JW3941	ydeT__b1505__JW1499	SF_CORE	SF_PREDICTED
birA__b3973__JW3941	ydgI__b1605__JW1597	SF_CORE	SF_PREDICTED
birA__b3973__JW3941	ydiN__b1691__JW5274	SF_CORE	SF_PREDICTED
birA__b3973__JW3941	yegE__b2067__JW2052	SF_CORE	SF_PREDICTED
birA__b3973__JW3941	yfeO__b2389__JW2386	SF_CORE	SF_PREDICTED
birA__b3973__JW3941	yfgH__b2505__JW5400	SF_CORE	SF_PREDICTED
birA__b3973__JW3941	yhiP__b3496__JW3463	SF_CORE	SF_PREDICTED
birA__b3973__JW3941	yhjV__b3539__JW3508	SF_CORE	SF_PREDICTED
birA__b3973__JW3941	yibH__b3597__JW3571	SF_CORE	SF_UNCERTAIN
birA__b3973__JW3941	yieG__b3714__JW3692	SF_CORE	SF_PREDICTED
birA__b3973__JW3941	yihP__b3877__JW3848	SF_CORE	SF_UNCERTAIN
birA__b3973__JW3941	yijE__b3943__JW5557	SF_CORE	SF_PREDICTED
birA__b3973__JW3941	yjbF__b4027__JW5711	SF_CORE	SF_PREDICTED
birA__b3973__JW3941	yjcD__b4064__JW4025	SF_CORE	SF_PREDICTED
birA__b3973__JW3941	yjeM__b4156__JW5739	SF_CORE	SF_PREDICTED
birA__b3973__JW3941	yjhF__b4296__JW4258	SF_CORE	SF_PREDICTED
birA__b3973__JW3941	yqcE__b2775__JW2746	SF_CORE	SF_PREDICTED
birA__b3973__JW3941	yrbK__b3199__JW3166	SF_CORE	SF_CORE
birA__b3973__JW3941	ytfF__b4210__JW4168	SF_CORE	SF_PREDICTED
birA__b3973__JW3941	ytfN__b4221__JW4180	SF_CORE	SF_PREDICTED
blc__b4149__JW4110	cusA__b0575__JW0564	SF_UNCERTAIN	SF_UNCERTAIN
blc__b4149__JW4110	dppD__b3541__JW3510	SF_UNCERTAIN	SF_CORE
blc__b4149__JW4110	pldA__b3821__JW3794	SF_UNCERTAIN	MF_UNCERTAIN
blc__b4149__JW4110	ydiN__b1691__JW5274	SF_UNCERTAIN	SF_PREDICTED
blc__b4149__JW4110	yfcJ__b2322__JW2319	SF_UNCERTAIN	SF_PREDICTED
blc__b4149__JW4110	yhjE__b3523__JW3491	SF_UNCERTAIN	SF_PREDICTED
blc__b4149__JW4110	yhjV__b3539__JW3508	SF_UNCERTAIN	SF_PREDICTED
blc__b4149__JW4110	yihP__b3877__JW3848	SF_UNCERTAIN	SF_UNCERTAIN
blc__b4149__JW4110	yjbF__b4027__JW5711	SF_UNCERTAIN	SF_PREDICTED
blc__b4149__JW4110	yjhA__b4311__JW5778	SF_UNCERTAIN	SF_PREDICTED
blc__b4149__JW4110	ypjA__b2647__JW5422	SF_UNCERTAIN	SF_UNCERTAIN
blc__b4149__JW4110	ytfN__b4221__JW4180	SF_UNCERTAIN	SF_PREDICTED
blr__b4409__JW5963	ackA__b2296__JW2293	SF_UNCERTAIN	SF_UNCERTAIN
blr__b4409__JW5963	acpS__b2563__JW2547	SF_UNCERTAIN	SF_CORE
blr__b4409__JW5963	agaS__b3136__JW3105	SF_UNCERTAIN	SF_UNCERTAIN
blr__b4409__JW5963	amiA__b2435__JW2428	SF_UNCERTAIN	SF_CORE
blr__b4409__JW5963	ampG__b0433__JW0423	SF_UNCERTAIN	SF_CORE
blr__b4409__JW5963	ansB__b2957__JW2924	SF_UNCERTAIN	SF_UNCERTAIN
blr__b4409__JW5963	appB__b0979__JW0961	SF_UNCERTAIN	SF_UNCERTAIN
blr__b4409__JW5963	appC__b0978__JW0960	SF_UNCERTAIN	SF_UNCERTAIN
blr__b4409__JW5963	avtA__b3572__JW5652	SF_UNCERTAIN	SF_CORE
blr__b4409__JW5963	bcr__b2182__JW5363	SF_UNCERTAIN	SF_PREDICTED
blr__b4409__JW5963	bcsC__b3530__JW5942	SF_UNCERTAIN	SF_CORE
blr__b4409__JW5963	bglH__b3720__JW3698	SF_UNCERTAIN	SF_PREDICTED
blr__b4409__JW5963	birA__b3973__JW3941	SF_UNCERTAIN	SF_CORE
blr__b4409__JW5963	btuD__b1709__JW1699	SF_UNCERTAIN	SF_UNCERTAIN
blr__b4409__JW5963	caiE__b0035__JW5004	SF_UNCERTAIN	SF_UNCERTAIN
blr__b4409__JW5963	cdh__b3918__JW3889	SF_UNCERTAIN	SF_CORE
blr__b4409__JW5963	cedA__b1731__JW1720	SF_UNCERTAIN	SF_UNCERTAIN
blr__b4409__JW5963	cheB__b1883__JW1872	SF_UNCERTAIN	SF_UNCERTAIN
blr__b4409__JW5963	cheY__b1882__JW1871	SF_UNCERTAIN	SF_UNCERTAIN
blr__b4409__JW5963	cheZ__b1881__JW1870	SF_UNCERTAIN	SF_UNCERTAIN
blr__b4409__JW5963	cusF__b0573__JW0562	SF_UNCERTAIN	SF_UNCERTAIN
blr__b4409__JW5963	cydC__b0886__JW0869	SF_UNCERTAIN	SF_UNCERTAIN
blr__b4409__JW5963	dacD__b2010__JW5329	SF_UNCERTAIN	SF_CORE
blr__b4409__JW5963	dcrB__b3472__JW5682	SF_UNCERTAIN	SF_UNCERTAIN
blr__b4409__JW5963	ddpF__b1483__JW1478	SF_UNCERTAIN	SF_CORE
blr__b4409__JW5963	emrK__b2368__JW2365	SF_UNCERTAIN	SF_UNCERTAIN
blr__b4409__JW5963	entF__b0586__JW0578	SF_UNCERTAIN	SF_CORE
blr__b4409__JW5963	exbB__b3006__JW2974	SF_UNCERTAIN	SF_CORE
blr__b4409__JW5963	fabF__b1095__JW1081	SF_UNCERTAIN	SF_CORE
blr__b4409__JW5963	fabG__b1093__JW1079	SF_UNCERTAIN	SF_CORE
blr__b4409__JW5963	fabH__b1091__JW1077	SF_UNCERTAIN	SF_CORE
blr__b4409__JW5963	fadA__b3845__JW5578	SF_UNCERTAIN	SF_CORE
blr__b4409__JW5963	fadB__b3846__JW3822	SF_UNCERTAIN	SF_CORE
blr__b4409__JW5963	fcl__b2052__JW2037	SF_UNCERTAIN	SF_UNCERTAIN
blr__b4409__JW5963	fecB__b4290__JW4250	SF_UNCERTAIN	SF_UNCERTAIN
blr__b4409__JW5963	fecD__b4288__JW4248	SF_UNCERTAIN	SF_UNCERTAIN
blr__b4409__JW5963	fecE__b4287__JW4247	SF_UNCERTAIN	SF_UNCERTAIN
blr__b4409__JW5963	fiu__b0805__JW0790	SF_UNCERTAIN	SF_UNCERTAIN
blr__b4409__JW5963	folE__b2153__JW2140	SF_UNCERTAIN	SF_UNCERTAIN
blr__b4409__JW5963	frdA__b4154__JW4115	SF_UNCERTAIN	SF_UNCERTAIN
blr__b4409__JW5963	frdC__b4152__JW4113	SF_UNCERTAIN	SF_UNCERTAIN
blr__b4409__JW5963	frdD__b4151__JW4112	SF_UNCERTAIN	SF_UNCERTAIN
blr__b4409__JW5963	galU__b1236__JW1224	SF_UNCERTAIN	MF_CORE
blr__b4409__JW5963	ggt__b3447__JW3412	SF_UNCERTAIN	SF_UNCERTAIN
blr__b4409__JW5963	glpQ__b2239__JW2233	SF_UNCERTAIN	SF_CORE
blr__b4409__JW5963	gspM__b3334__JW5704	SF_UNCERTAIN	SF_UNCERTAIN
blr__b4409__JW5963	ispE__b1208__JW1199	SF_UNCERTAIN	SF_CORE
blr__b4409__JW5963	kdsC__b3198__JW3165	SF_UNCERTAIN	SF_CORE
blr__b4409__JW5963	kdsD__b3197__JW3164	SF_UNCERTAIN	SF_CORE
blr__b4409__JW5963	ldcA__b1192__JW1181	SF_UNCERTAIN	SF_CORE
blr__b4409__JW5963	lepA__b2569__JW2553	SF_UNCERTAIN	SF_UNCERTAIN
blr__b4409__JW5963	lolA__b0891__JW0874	SF_UNCERTAIN	MF_CORE
blr__b4409__JW5963	lolD__b1117__JW5162	SF_UNCERTAIN	SF_CORE
blr__b4409__JW5963	lpcA__b0222__JW0212	SF_UNCERTAIN	SF_CORE
blr__b4409__JW5963	lpxA__b0181__JW0176	SF_UNCERTAIN	SF_CORE
blr__b4409__JW5963	lpxK__b0915__JW0898	SF_UNCERTAIN	SF_CORE
blr__b4409__JW5963	mdlA__b0448__JW0438	SF_UNCERTAIN	SF_UNCERTAIN
blr__b4409__JW5963	mdlB__b0449__JW5061	SF_UNCERTAIN	SF_UNCERTAIN
blr__b4409__JW5963	mdoC__b1047__JW1034	SF_UNCERTAIN	SF_CORE
blr__b4409__JW5963	mdtI__b1599__JW1591	SF_UNCERTAIN	SF_UNCERTAIN
blr__b4409__JW5963	mdtK__b1663__JW1655	SF_UNCERTAIN	SF_UNCERTAIN
blr__b4409__JW5963	mipA__b1782__JW1771	SF_UNCERTAIN	SF_CORE
blr__b4409__JW5963	mrcA__b3396__JW3359	SF_UNCERTAIN	SF_CORE
blr__b4409__JW5963	mrdA__b0635__JW0630	SF_UNCERTAIN	MF_CORE
blr__b4409__JW5963	mreC__b3250__JW3219	SF_UNCERTAIN	MF_CORE
blr__b4409__JW5963	mukB__b0924__JW0907	SF_UNCERTAIN	MF_CORE
blr__b4409__JW5963	murA__b3189__JW3156	SF_UNCERTAIN	SF_CORE
blr__b4409__JW5963	murB__b3972__JW3940	SF_UNCERTAIN	SF_CORE
blr__b4409__JW5963	nanK__b3222__JW5538	SF_UNCERTAIN	SF_UNCERTAIN
blr__b4409__JW5963	ompA__b0957__JW0940	SF_UNCERTAIN	SF_CORE
blr__b4409__JW5963	ompF__b0929__JW0912	SF_UNCERTAIN	SF_CORE
blr__b4409__JW5963	ompN__b1377__JW1371	SF_UNCERTAIN	SF_UNCERTAIN
blr__b4409__JW5963	ompX__b0814__JW0799	SF_UNCERTAIN	SF_UNCERTAIN
blr__b4409__JW5963	oppD__b1246__JW1238	SF_UNCERTAIN	MF_CORE
blr__b4409__JW5963	oppF__b1247__JW1239	SF_UNCERTAIN	MF_CORE
blr__b4409__JW5963	paaH__b1395__JW1390	SF_UNCERTAIN	SF_CORE
blr__b4409__JW5963	pabB__b1812__JW1801	SF_UNCERTAIN	SF_UNCERTAIN
blr__b4409__JW5963	panF__b3258__JW3226	SF_UNCERTAIN	SF_UNCERTAIN
blr__b4409__JW5963	phoE__b0241__JW0231	SF_UNCERTAIN	SF_CORE
blr__b4409__JW5963	pldA__b3821__JW3794	SF_UNCERTAIN	MF_UNCERTAIN
blr__b4409__JW5963	pldB__b3825__JW5584	SF_UNCERTAIN	SF_CORE
blr__b4409__JW5963	plsC__b3018__JW2986	SF_UNCERTAIN	SF_CORE
blr__b4409__JW5963	pppA__b2972__JW2939	SF_UNCERTAIN	SF_UNCERTAIN
blr__b4409__JW5963	rfaI__b3627__JW3602	SF_UNCERTAIN	SF_CORE
blr__b4409__JW5963	rfaS__b3629__JW3604	SF_UNCERTAIN	SF_UNCERTAIN
blr__b4409__JW5963	rlpA__b0633__JW0628	SF_UNCERTAIN	SF_PREDICTED
blr__b4409__JW5963	rlpB__b0641__JW0636	SF_UNCERTAIN	SF_CORE
blr__b4409__JW5963	rpoS__b2741__JW5437	SF_UNCERTAIN	SF_CORE
blr__b4409__JW5963	rssA__b1234__JW1222	SF_UNCERTAIN	SF_UNCERTAIN
blr__b4409__JW5963	sapA__b1294__JW1287	SF_UNCERTAIN	SF_UNCERTAIN
blr__b4409__JW5963	sapB__b1293__JW1286	SF_UNCERTAIN	SF_UNCERTAIN
blr__b4409__JW5963	sapD__b1291__JW1284	SF_UNCERTAIN	SF_UNCERTAIN
blr__b4409__JW5963	secD__b0408__JW0398	SF_UNCERTAIN	SF_CORE
blr__b4409__JW5963	sugE__b4148__JW5738	SF_UNCERTAIN	SF_UNCERTAIN
blr__b4409__JW5963	ugpC__b3450__JW3415	SF_UNCERTAIN	SF_CORE
blr__b4409__JW5963	ugpE__b3451__JW3416	SF_UNCERTAIN	SF_CORE
blr__b4409__JW5963	vacJ__b2346__JW2343	SF_UNCERTAIN	SF_CORE
blr__b4409__JW5963	wcaD__b2056__JW2041	SF_UNCERTAIN	SF_UNCERTAIN
blr__b4409__JW5963	wcaE__b2055__JW2040	SF_UNCERTAIN	SF_UNCERTAIN
blr__b4409__JW5963	wza__b2062__JW2047	SF_UNCERTAIN	MF_CORE
blr__b4409__JW5963	wzc__b2060__JW2045	SF_UNCERTAIN	MF_CORE
blr__b4409__JW5963	wzxC__b2046__JW2031	SF_UNCERTAIN	SF_CORE
blr__b4409__JW5963	yadE__b0130__JW0126	SF_UNCERTAIN	SF_PREDICTED
blr__b4409__JW5963	yahF__b0320__JW0312	SF_UNCERTAIN	SF_UNCERTAIN
blr__b4409__JW5963	yaiO__b0358__JW0349	SF_UNCERTAIN	SF_UNCERTAIN
blr__b4409__JW5963	yaiP__b0363__JW0355	SF_UNCERTAIN	SF_PREDICTED
blr__b4409__JW5963	yaiT__b0371__JW0362	SF_UNCERTAIN	SF_PREDICTED
blr__b4409__JW5963	yajR__b0427__JW5059	SF_UNCERTAIN	SF_PREDICTED
blr__b4409__JW5963	ybaW__b0443__JW0433	SF_UNCERTAIN	MF_UNCERTAIN
blr__b4409__JW5963	ybbW__b0511__JW0499	SF_UNCERTAIN	SF_PREDICTED
blr__b4409__JW5963	ybgH__b0709__JW0699	SF_UNCERTAIN	SF_PREDICTED
blr__b4409__JW5963	ybiR__b0818__JW0802	SF_UNCERTAIN	SF_PREDICTED
blr__b4409__JW5963	ybjJ__b0845__JW0829	SF_UNCERTAIN	SF_PREDICTED
blr__b4409__JW5963	ycaI__b0913__JW5120	SF_UNCERTAIN	SF_PREDICTED
blr__b4409__JW5963	yceK__b1050__JW5151	SF_UNCERTAIN	SF_PREDICTED
blr__b4409__JW5963	ycfL__b1104__JW1090	SF_UNCERTAIN	SF_PREDICTED
blr__b4409__JW5963	ydcO__b1433__JW5229	SF_UNCERTAIN	SF_PREDICTED
blr__b4409__JW5963	yddA__b1496__JW5242	SF_UNCERTAIN	SF_UNCERTAIN
blr__b4409__JW5963	yddL__b1472__JW1468	SF_UNCERTAIN	SF_PREDICTED
blr__b4409__JW5963	ydeA__b1528__JW1521	SF_UNCERTAIN	SF_PREDICTED
blr__b4409__JW5963	ydeK__b1510__JW1503	SF_UNCERTAIN	SF_PREDICTED
blr__b4409__JW5963	ydfJ__b1543__JW1536	SF_UNCERTAIN	SF_PREDICTED
blr__b4409__JW5963	ydhC__b1660__JW1652	SF_UNCERTAIN	SF_PREDICTED
blr__b4409__JW5963	ydhP__b1657__JW1649	SF_UNCERTAIN	SF_PREDICTED
blr__b4409__JW5963	ydiM__b1690__JW1680	SF_UNCERTAIN	SF_PREDICTED
blr__b4409__JW5963	ydiY__b1722__JW1711	SF_UNCERTAIN	SF_PREDICTED
blr__b4409__JW5963	ydjE__b1769__JW1758	SF_UNCERTAIN	SF_PREDICTED
blr__b4409__JW5963	ydjN__b1729__JW1718	SF_UNCERTAIN	SF_PREDICTED
blr__b4409__JW5963	yeeF__b2014__JW5330	SF_UNCERTAIN	SF_PREDICTED
blr__b4409__JW5963	yegE__b2067__JW2052	SF_UNCERTAIN	SF_PREDICTED
blr__b4409__JW5963	yehB__b2109__JW2096	SF_UNCERTAIN	SF_PREDICTED
blr__b4409__JW5963	yehU__b2126__JW5353	SF_UNCERTAIN	MF_PREDICTED
blr__b4409__JW5963	yfaL__b2233__JW2227	SF_UNCERTAIN	SF_UNCERTAIN
blr__b4409__JW5963	yfaV__b2246__JW2240	SF_UNCERTAIN	SF_PREDICTED
blr__b4409__JW5963	yfaW__b2247__JW2241	SF_UNCERTAIN	SF_UNCERTAIN
blr__b4409__JW5963	yfbE__b2253__JW5372	SF_UNCERTAIN	SF_CORE
blr__b4409__JW5963	yfcC__b2298__JW2295	SF_UNCERTAIN	SF_PREDICTED
blr__b4409__JW5963	yfcU__b2338__JW2335	SF_UNCERTAIN	SF_PREDICTED
blr__b4409__JW5963	yfdH__b2351__JW2347	SF_UNCERTAIN	SF_UNCERTAIN
blr__b4409__JW5963	yfdI__b2352__JW5382	SF_UNCERTAIN	SF_PREDICTED
blr__b4409__JW5963	yfeH__b2410__JW5876	SF_UNCERTAIN	SF_PREDICTED
blr__b4409__JW5963	ygeD__b2835__JW2803	SF_UNCERTAIN	SF_CORE
blr__b4409__JW5963	ygfQ__b2884__JW5467	SF_UNCERTAIN	SF_PREDICTED
blr__b4409__JW5963	yhcD__b3216__JW3183	SF_UNCERTAIN	SF_PREDICTED
blr__b4409__JW5963	yhhS__b3473__JW5945	SF_UNCERTAIN	SF_PREDICTED
blr__b4409__JW5963	yhjE__b3523__JW3491	SF_UNCERTAIN	SF_PREDICTED
blr__b4409__JW5963	yibH__b3597__JW3571	SF_UNCERTAIN	SF_UNCERTAIN
blr__b4409__JW5963	yidK__b3679__JW3655	SF_UNCERTAIN	SF_UNCERTAIN
blr__b4409__JW5963	yihP__b3877__JW3848	SF_UNCERTAIN	SF_UNCERTAIN
blr__b4409__JW5963	yjeM__b4156__JW5739	SF_UNCERTAIN	SF_PREDICTED
blr__b4409__JW5963	yjhA__b4311__JW5778	SF_UNCERTAIN	SF_PREDICTED
blr__b4409__JW5963	yjiJ__b4332__JW4295	SF_UNCERTAIN	SF_PREDICTED
blr__b4409__JW5963	yjiO__b4337__JW4300	SF_UNCERTAIN	SF_UNCERTAIN
blr__b4409__JW5963	ylbH__b0499__JW0488	SF_UNCERTAIN	SF_UNCERTAIN
blr__b4409__JW5963	yliI__b0837__JW0821	SF_UNCERTAIN	SF_UNCERTAIN
blr__b4409__JW5963	yohG__b2138__JW5838	SF_UNCERTAIN	SF_UNCERTAIN
blr__b4409__JW5963	yojI__b2211__JW2199	SF_UNCERTAIN	SF_UNCERTAIN
blr__b4409__JW5963	yqiG__b3046__JW5507	SF_UNCERTAIN	SF_PREDICTED
blr__b4409__JW5963	yraP__b3150__JW3119	SF_UNCERTAIN	MF_UNCERTAIN
blr__b4409__JW5963	yrbK__b3199__JW3166	SF_UNCERTAIN	SF_CORE
blr__b4409__JW5963	ytfF__b4210__JW4168	SF_UNCERTAIN	SF_PREDICTED
blr__b4409__JW5963	zipA__b2412__JW2404	SF_UNCERTAIN	MF_CORE
btuB__b3966__JW3938	agaS__b3136__JW3105	SF_UNCERTAIN	SF_UNCERTAIN
btuB__b3966__JW3938	amiA__b2435__JW2428	SF_UNCERTAIN	SF_CORE
btuB__b3966__JW3938	btuD__b1709__JW1699	SF_UNCERTAIN	SF_UNCERTAIN
btuB__b3966__JW3938	cheZ__b1881__JW1870	SF_UNCERTAIN	SF_UNCERTAIN
btuB__b3966__JW3938	cydC__b0886__JW0869	SF_UNCERTAIN	SF_UNCERTAIN
btuB__b3966__JW3938	dacB__b3182__JW3149	SF_UNCERTAIN	SF_CORE
btuB__b3966__JW3938	dsbG__b0604__JW0597	SF_UNCERTAIN	SF_CORE
btuB__b3966__JW3938	emtA__b1193__JW5821	SF_UNCERTAIN	MF_CORE
btuB__b3966__JW3938	envC__b3613__JW5646	SF_UNCERTAIN	SF_CORE
btuB__b3966__JW3938	fecC__b4289__JW4249	SF_UNCERTAIN	SF_UNCERTAIN
btuB__b3966__JW3938	kdsA__b1215__JW1206	SF_UNCERTAIN	SF_CORE
btuB__b3966__JW3938	kdsC__b3198__JW3165	SF_UNCERTAIN	SF_CORE
btuB__b3966__JW3938	kdsD__b3197__JW3164	SF_UNCERTAIN	SF_CORE
btuB__b3966__JW3938	ldcA__b1192__JW1181	SF_UNCERTAIN	SF_CORE
btuB__b3966__JW3938	nanK__b3222__JW5538	SF_UNCERTAIN	SF_UNCERTAIN
btuB__b3966__JW3938	nlpD__b2742__JW2712	SF_UNCERTAIN	SF_UNCERTAIN
btuB__b3966__JW3938	ompL__b3875__JW3846	SF_UNCERTAIN	SF_UNCERTAIN
btuB__b3966__JW3938	oppD__b1246__JW1238	SF_UNCERTAIN	MF_CORE
btuB__b3966__JW3938	osmB__b1283__JW1275	SF_UNCERTAIN	SF_CORE
btuB__b3966__JW3938	paaH__b1395__JW1390	SF_UNCERTAIN	SF_CORE
btuB__b3966__JW3938	pbpC__b2519__JW2503	SF_UNCERTAIN	SF_CORE
btuB__b3966__JW3938	rffA__b3791__JW3765	SF_UNCERTAIN	SF_CORE
btuB__b3966__JW3938	rssA__b1234__JW1222	SF_UNCERTAIN	SF_UNCERTAIN
btuB__b3966__JW3938	tolQ__b0737__JW0727	SF_UNCERTAIN	SF_CORE
btuB__b3966__JW3938	ugd__b2028__JW2010	SF_UNCERTAIN	MF_CORE
btuB__b3966__JW3938	wbbK__b2032__JW2017	SF_UNCERTAIN	SF_PREDICTED
btuB__b3966__JW3938	wcaE__b2055__JW2040	SF_UNCERTAIN	SF_UNCERTAIN
btuB__b3966__JW3938	wzc__b2060__JW2045	SF_UNCERTAIN	MF_CORE
btuB__b3966__JW3938	wzxE__b3792__JW3766	SF_UNCERTAIN	MF_CORE
btuB__b3966__JW3938	ybbW__b0511__JW0499	SF_UNCERTAIN	SF_PREDICTED
btuB__b3966__JW3938	ydeA__b1528__JW1521	SF_UNCERTAIN	SF_PREDICTED
btuB__b3966__JW3938	ydjE__b1769__JW1758	SF_UNCERTAIN	SF_PREDICTED
btuB__b3966__JW3938	ydjN__b1729__JW1718	SF_UNCERTAIN	SF_PREDICTED
btuB__b3966__JW3938	yfbG__b2255__JW2249	SF_UNCERTAIN	SF_CORE
btuB__b3966__JW3938	yfeH__b2410__JW5876	SF_UNCERTAIN	SF_PREDICTED
btuB__b3966__JW3938	yibH__b3597__JW3571	SF_UNCERTAIN	SF_UNCERTAIN
btuB__b3966__JW3938	yihA__b3865__JW5930	SF_UNCERTAIN	SF_UNCERTAIN
btuB__b3966__JW3938	yjcD__b4064__JW4025	SF_UNCERTAIN	SF_PREDICTED
btuB__b3966__JW3938	yncD__b1451__JW1446	SF_UNCERTAIN	SF_PREDICTED
btuB__b3966__JW3938	yrbK__b3199__JW3166	SF_UNCERTAIN	SF_CORE
btuF__b0158__JW0154	ackA__b2296__JW2293	SF_UNCERTAIN	SF_UNCERTAIN
btuF__b0158__JW0154	agaS__b3136__JW3105	SF_UNCERTAIN	SF_UNCERTAIN
btuF__b0158__JW0154	amiA__b2435__JW2428	SF_UNCERTAIN	SF_CORE
btuF__b0158__JW0154	ansB__b2957__JW2924	SF_UNCERTAIN	SF_UNCERTAIN
btuF__b0158__JW0154	cydC__b0886__JW0869	SF_UNCERTAIN	SF_UNCERTAIN
btuF__b0158__JW0154	dacA__b0632__JW0627	SF_UNCERTAIN	SF_CORE
btuF__b0158__JW0154	damX__b3388__JW3351	SF_UNCERTAIN	SF_UNCERTAIN
btuF__b0158__JW0154	dppD__b3541__JW3510	SF_UNCERTAIN	SF_CORE
btuF__b0158__JW0154	dsbG__b0604__JW0597	SF_UNCERTAIN	SF_CORE
btuF__b0158__JW0154	dut__b3640__JW3615	SF_UNCERTAIN	SF_CORE
btuF__b0158__JW0154	envC__b3613__JW5646	SF_UNCERTAIN	SF_CORE
btuF__b0158__JW0154	fecC__b4289__JW4249	SF_UNCERTAIN	SF_UNCERTAIN
btuF__b0158__JW0154	gmd__b2053__JW2038	SF_UNCERTAIN	SF_CORE
btuF__b0158__JW0154	gspA__b3323__JW3285	SF_UNCERTAIN	SF_UNCERTAIN
btuF__b0158__JW0154	hflX__b4173__JW4131	SF_UNCERTAIN	SF_UNCERTAIN
btuF__b0158__JW0154	lepA__b2569__JW2553	SF_UNCERTAIN	SF_UNCERTAIN
btuF__b0158__JW0154	motA__b1890__JW1879	SF_UNCERTAIN	SF_UNCERTAIN
btuF__b0158__JW0154	plsC__b3018__JW2986	SF_UNCERTAIN	SF_CORE
btuF__b0158__JW0154	rffA__b3791__JW3765	SF_UNCERTAIN	SF_CORE
btuF__b0158__JW0154	rplW__b3318__JW3280	SF_UNCERTAIN	SF_UNCERTAIN
btuF__b0158__JW0154	sugE__b4148__JW5738	SF_UNCERTAIN	SF_UNCERTAIN
btuF__b0158__JW0154	surA__b0053__JW0052	SF_UNCERTAIN	MF_CORE
btuF__b0158__JW0154	ugd__b2028__JW2010	SF_UNCERTAIN	MF_CORE
btuF__b0158__JW0154	ugpE__b3451__JW3416	SF_UNCERTAIN	SF_CORE
btuF__b0158__JW0154	wcaF__b2054__JW2039	SF_UNCERTAIN	SF_UNCERTAIN
btuF__b0158__JW0154	ybaY__b0453__JW0443	SF_UNCERTAIN	SF_PREDICTED
btuF__b0158__JW0154	yddA__b1496__JW5242	SF_UNCERTAIN	SF_UNCERTAIN
btuF__b0158__JW0154	ydeA__b1528__JW1521	SF_UNCERTAIN	SF_PREDICTED
btuF__b0158__JW0154	ydgI__b1605__JW1597	SF_UNCERTAIN	SF_PREDICTED
btuF__b0158__JW0154	ydhK__b1645__JW1637	SF_UNCERTAIN	SF_PREDICTED
btuF__b0158__JW0154	ydjE__b1769__JW1758	SF_UNCERTAIN	SF_PREDICTED
btuF__b0158__JW0154	yebA__b1856__JW5304	SF_UNCERTAIN	MF_UNCERTAIN
btuF__b0158__JW0154	yfbG__b2255__JW2249	SF_UNCERTAIN	SF_CORE
btuF__b0158__JW0154	yfdV__b2372__JW2369	SF_UNCERTAIN	SF_PREDICTED
btuF__b0158__JW0154	yhjE__b3523__JW3491	SF_UNCERTAIN	SF_PREDICTED
btuF__b0158__JW0154	yibH__b3597__JW3571	SF_UNCERTAIN	SF_UNCERTAIN
btuF__b0158__JW0154	yjbF__b4027__JW5711	SF_UNCERTAIN	SF_PREDICTED
btuF__b0158__JW0154	yjcD__b4064__JW4025	SF_UNCERTAIN	SF_PREDICTED
btuF__b0158__JW0154	yjcE__b4065__JW4026	SF_UNCERTAIN	SF_UNCERTAIN
btuF__b0158__JW0154	yjeM__b4156__JW5739	SF_UNCERTAIN	SF_PREDICTED
btuF__b0158__JW0154	yrbK__b3199__JW3166	SF_UNCERTAIN	SF_CORE
caiA__b0039__JW0038	aaeB__b3240__JW3209	SF_UNCERTAIN	SF_PREDICTED
caiA__b0039__JW0038	acrE__b3265__JW3233	SF_UNCERTAIN	SF_UNCERTAIN
caiA__b0039__JW0038	agaS__b3136__JW3105	SF_UNCERTAIN	SF_UNCERTAIN
caiA__b0039__JW0038	ampD__b0110__JW0106	SF_UNCERTAIN	SF_CORE
caiA__b0039__JW0038	ansB__b2957__JW2924	SF_UNCERTAIN	SF_UNCERTAIN
caiA__b0039__JW0038	appC__b0978__JW0960	SF_UNCERTAIN	SF_UNCERTAIN
caiA__b0039__JW0038	arcB__b3210__JW5536	SF_UNCERTAIN	SF_UNCERTAIN
caiA__b0039__JW0038	btuD__b1709__JW1699	SF_UNCERTAIN	SF_UNCERTAIN
caiA__b0039__JW0038	cedA__b1731__JW1720	SF_UNCERTAIN	SF_UNCERTAIN
caiA__b0039__JW0038	cheZ__b1881__JW1870	SF_UNCERTAIN	SF_UNCERTAIN
caiA__b0039__JW0038	cpsB__b2049__JW2034	SF_UNCERTAIN	SF_CORE
caiA__b0039__JW0038	cusF__b0573__JW0562	SF_UNCERTAIN	SF_UNCERTAIN
caiA__b0039__JW0038	dacB__b3182__JW3149	SF_UNCERTAIN	SF_CORE
caiA__b0039__JW0038	dacD__b2010__JW5329	SF_UNCERTAIN	SF_CORE
caiA__b0039__JW0038	damX__b3388__JW3351	SF_UNCERTAIN	SF_UNCERTAIN
caiA__b0039__JW0038	ddg__b2378__JW2375	SF_UNCERTAIN	SF_CORE
caiA__b0039__JW0038	dgkA__b4042__JW4002	SF_UNCERTAIN	SF_CORE
caiA__b0039__JW0038	dppA__b3544__JW3513	SF_UNCERTAIN	SF_CORE
caiA__b0039__JW0038	ecnA__b4410__JW5737	SF_UNCERTAIN	SF_UNCERTAIN
caiA__b0039__JW0038	exbB__b3006__JW2974	SF_UNCERTAIN	SF_CORE
caiA__b0039__JW0038	fadD__b1805__JW1794	SF_UNCERTAIN	SF_CORE
caiA__b0039__JW0038	fadE__b0221__JW5020	SF_UNCERTAIN	SF_CORE
caiA__b0039__JW0038	fecC__b4289__JW4249	SF_UNCERTAIN	SF_UNCERTAIN
caiA__b0039__JW0038	fecE__b4287__JW4247	SF_UNCERTAIN	SF_UNCERTAIN
caiA__b0039__JW0038	fepB__b0592__JW0584	SF_UNCERTAIN	SF_CORE
caiA__b0039__JW0038	fhuA__b0150__JW0146	SF_UNCERTAIN	SF_UNCERTAIN
caiA__b0039__JW0038	fhuC__b0151__JW0147	SF_UNCERTAIN	SF_UNCERTAIN
caiA__b0039__JW0038	fiu__b0805__JW0790	SF_UNCERTAIN	SF_UNCERTAIN
caiA__b0039__JW0038	frdA__b4154__JW4115	SF_UNCERTAIN	SF_UNCERTAIN
caiA__b0039__JW0038	frdB__b4153__JW4114	SF_UNCERTAIN	SF_UNCERTAIN
caiA__b0039__JW0038	galF__b2042__JW2027	SF_UNCERTAIN	MF_CORE
caiA__b0039__JW0038	galU__b1236__JW1224	SF_UNCERTAIN	MF_CORE
caiA__b0039__JW0038	ggt__b3447__JW3412	SF_UNCERTAIN	SF_UNCERTAIN
caiA__b0039__JW0038	glgB__b3432__JW3395	SF_UNCERTAIN	SF_UNCERTAIN
caiA__b0039__JW0038	glpQ__b2239__JW2233	SF_UNCERTAIN	SF_CORE
caiA__b0039__JW0038	glpT__b2240__JW2234	SF_UNCERTAIN	SF_CORE
caiA__b0039__JW0038	gspA__b3323__JW3285	SF_UNCERTAIN	SF_UNCERTAIN
caiA__b0039__JW0038	gspG__b3328__JW3290	SF_UNCERTAIN	SF_UNCERTAIN
caiA__b0039__JW0038	kdsC__b3198__JW3165	SF_UNCERTAIN	SF_CORE
caiA__b0039__JW0038	kdsD__b3197__JW3164	SF_UNCERTAIN	SF_CORE
caiA__b0039__JW0038	ldcA__b1192__JW1181	SF_UNCERTAIN	SF_CORE
caiA__b0039__JW0038	lpxM__b1855__JW1844	SF_UNCERTAIN	SF_CORE
caiA__b0039__JW0038	mdlB__b0449__JW5061	SF_UNCERTAIN	SF_UNCERTAIN
caiA__b0039__JW0038	mdtI__b1599__JW1591	SF_UNCERTAIN	SF_UNCERTAIN
caiA__b0039__JW0038	mdtJ__b1600__JW1592	SF_UNCERTAIN	SF_UNCERTAIN
caiA__b0039__JW0038	mltA__b2813__JW2784	SF_UNCERTAIN	MF_CORE
caiA__b0039__JW0038	nanA__b3225__JW3194	SF_UNCERTAIN	SF_UNCERTAIN
caiA__b0039__JW0038	nanK__b3222__JW5538	SF_UNCERTAIN	SF_UNCERTAIN
caiA__b0039__JW0038	nlpD__b2742__JW2712	SF_UNCERTAIN	SF_UNCERTAIN
caiA__b0039__JW0038	ompC__b2215__JW2203	SF_UNCERTAIN	SF_CORE
caiA__b0039__JW0038	ompX__b0814__JW0799	SF_UNCERTAIN	SF_UNCERTAIN
caiA__b0039__JW0038	oppB__b1244__JW1236	SF_UNCERTAIN	MF_CORE
caiA__b0039__JW0038	paaH__b1395__JW1390	SF_UNCERTAIN	SF_CORE
caiA__b0039__JW0038	pabC__b1096__JW1082	SF_UNCERTAIN	SF_UNCERTAIN
caiA__b0039__JW0038	pbpC__b2519__JW2503	SF_UNCERTAIN	SF_CORE
caiA__b0039__JW0038	pgpA__b0418__JW0408	SF_UNCERTAIN	SF_CORE
caiA__b0039__JW0038	pldA__b3821__JW3794	SF_UNCERTAIN	MF_UNCERTAIN
caiA__b0039__JW0038	pldB__b3825__JW5584	SF_UNCERTAIN	SF_CORE
caiA__b0039__JW0038	plsC__b3018__JW2986	SF_UNCERTAIN	SF_CORE
caiA__b0039__JW0038	rfaB__b3628__JW3603	SF_UNCERTAIN	SF_CORE
caiA__b0039__JW0038	rfaG__b3631__JW3606	SF_UNCERTAIN	SF_CORE
caiA__b0039__JW0038	rfaY__b3625__JW3600	SF_UNCERTAIN	SF_CORE
caiA__b0039__JW0038	rfbC__b2038__JW2023	SF_UNCERTAIN	SF_CORE
caiA__b0039__JW0038	rfe__b3784__JW3758	SF_UNCERTAIN	SF_CORE
caiA__b0039__JW0038	rffD__b3787__JW5599	SF_UNCERTAIN	SF_CORE
caiA__b0039__JW0038	rffG__b3788__JW5598	SF_UNCERTAIN	SF_CORE
caiA__b0039__JW0038	rof__b0189__JW0184	SF_UNCERTAIN	SF_CORE
caiA__b0039__JW0038	sapA__b1294__JW1287	SF_UNCERTAIN	SF_UNCERTAIN
caiA__b0039__JW0038	sohA__b3129__JW3098	SF_UNCERTAIN	SF_UNCERTAIN
caiA__b0039__JW0038	spoT__b3650__JW3625	SF_UNCERTAIN	SF_UNCERTAIN
caiA__b0039__JW0038	torT__b0994__JW0979	SF_UNCERTAIN	SF_UNCERTAIN
caiA__b0039__JW0038	vacJ__b2346__JW2343	SF_UNCERTAIN	SF_CORE
caiA__b0039__JW0038	wcaA__b2059__JW2044	SF_UNCERTAIN	SF_UNCERTAIN
caiA__b0039__JW0038	wcaC__b2057__JW2042	SF_UNCERTAIN	SF_UNCERTAIN
caiA__b0039__JW0038	wzxE__b3792__JW3766	SF_UNCERTAIN	MF_CORE
caiA__b0039__JW0038	yaiS__b0364__JW0356	SF_UNCERTAIN	SF_PREDICTED
caiA__b0039__JW0038	yaiT__b0371__JW0362	SF_UNCERTAIN	SF_PREDICTED
caiA__b0039__JW0038	ybaY__b0453__JW0443	SF_UNCERTAIN	SF_PREDICTED
caiA__b0039__JW0038	ybbW__b0511__JW0499	SF_UNCERTAIN	SF_PREDICTED
caiA__b0039__JW0038	ybjI__b0844__JW5113	SF_UNCERTAIN	SF_UNCERTAIN
caiA__b0039__JW0038	ycdQ__b1022__JW1007	SF_UNCERTAIN	SF_UNCERTAIN
caiA__b0039__JW0038	yceG__b1097__JW1083	SF_UNCERTAIN	SF_PREDICTED
caiA__b0039__JW0038	yceK__b1050__JW5151	SF_UNCERTAIN	SF_PREDICTED
caiA__b0039__JW0038	ycfP__b1108__JW5158	SF_UNCERTAIN	SF_UNCERTAIN
caiA__b0039__JW0038	yddL__b1472__JW1468	SF_UNCERTAIN	SF_PREDICTED
caiA__b0039__JW0038	yddW__b1491__JW1486	SF_UNCERTAIN	SF_PREDICTED
caiA__b0039__JW0038	ydeA__b1528__JW1521	SF_UNCERTAIN	SF_PREDICTED
caiA__b0039__JW0038	ydeT__b1505__JW1499	SF_UNCERTAIN	SF_PREDICTED
caiA__b0039__JW0038	ydgI__b1605__JW1597	SF_UNCERTAIN	SF_PREDICTED
caiA__b0039__JW0038	ydhK__b1645__JW1637	SF_UNCERTAIN	SF_PREDICTED
caiA__b0039__JW0038	ydjE__b1769__JW1758	SF_UNCERTAIN	SF_PREDICTED
caiA__b0039__JW0038	ydjN__b1729__JW1718	SF_UNCERTAIN	SF_PREDICTED
caiA__b0039__JW0038	yeaY__b1806__JW1795	SF_UNCERTAIN	SF_PREDICTED
[truncated: 23,896 more rows]
