# Supplementary material for: Genetic Interaction Maps in Escherichia coli Reveal Functional Crosstalk among Cell Envelope Biogenesis Pathways
Source: PLoS Genet. 2011 Nov 17;7(11):e1002377. doi: 10.1371/journal.pgen.1002377 (PMC3219608; doi:10.1371/journal.pgen.1002377)
Supplement: Table S9 — Differential genetic interactions significant in rich medium and in minimal medium genetic screens. (XLSX) [file pgen.1002377.s028.xlsx]

## Sheet: differential_matrix
Table S9. Differential genetic interactions significant in rich medium and in minimal medium genetic screens
Gene1	Gene2	Differential Interactiona
ftsX__b3462__JW3427	pal__b0741__JW0731	-40
rfaC__b3621__JW3596	fepG__b0589__JW0581	-40
tolQ__b0737__JW0727	zipA__b2412__JW2404	-39.4245
rffM__b3794__JW3770	kdsB__b0918__JW0901	-37.872
yfaL__b2233__JW2227	ftsE__b3463__JW3428	-35.4036
yfbE__b2253__JW5372	tolR__b0738__JW0728	-34.0614
emrB__b2686__JW2661	spoT__b3650__JW3625	-33.7638
lolC__b1116__JW5161	ftsL__b0083__JW0081	-33.6161
gmhB__b0200__JW0196	fepD__b0590__JW0582	-32.8745
lpxD__b0179__JW0174	minD__b1175__JW1164	-32.7695
kdsA__b1215__JW1206	tolR__b0738__JW0728	-32.6462
kdsA__b1215__JW1206	yjeM__b4156__JW5739	-32.6408
cydB__b0734__JW0723	ydcL__b1431__JW1427	-32.4771
ftsQ__b0093__JW0091	tolB__b0740__JW5100	-32.3914
rfaP__b3630__JW3605	fepG__b0589__JW0581	-32.2424
ggt__b3447__JW3412	xerC__b3811__JW3784	-31.5462
blr__b4409__JW5963	emrY__b2367__JW2364	-31.5434
secY__b3300__JW3262	sohA__b3129__JW3098	-31.4986
micC__b4427__UNKW3110	lepA__b2569__JW2553	-31.4414
hflK__b4174__JW4132	ygeR__b2865__JW2833	-31.2375
minD__b1175__JW1164	lpxH__b0524__JW0513	-31.0869
murD__b0088__JW0086	ubiB__b3835__JW3812	-30.953
minE__b1174__JW1163	rplW__b3318__JW3280	-30.8264
yohG__b2138__JW5838	fepG__b0589__JW0581	-30.6898
glmS__b3729__JW3707	ftsE__b3463__JW3428	-30.6543
rfaE__b3052__JW3024	spoT__b3650__JW3625	-30.528
pbpG__b2134__JW5355	lpxB__b0182__JW0177	-30.4124
minE__b1174__JW1163	wbbI__b2034__JW2019	-30.2229
ygiH__b3059__JW3031	yhjE__b3523__JW3491	-30.0405
micC__b4427__UNKW3110	yhfK__b3358__JW5701	-29.8915
minE__b1174__JW1163	cyoA__b0432__JW0422	-29.8484
glpB__b2242__JW2236	ybeD__b0631__JW0626	-29.8331
kdsA__b1215__JW1206	rpmA__b3185__JW3152	-29.7882
ompA__b0957__JW0940	ackA__b2296__JW2293	-29.6978
kdtA__b3633__JW3608	ispE__b1208__JW1199	-29.6689
minD__b1175__JW1164	dppA__b3544__JW3513	-29.622
ubiX__b2311__JW2308	coaD__b3634__JW3609	-29.444
dsbB__b1185__JW5182	gspD__b3325__JW5707	-29.3901
blr__b4409__JW5963	cusA__b0575__JW0564	-29.3611
nanA__b3225__JW3194	yfiB__b2605__JW2586	-29.3568
glpB__b2242__JW2236	paaF__b1393__JW1388	-29.3349
rfaE__b3052__JW3024	ubiE__b3833__JW5581	-29.1692
minD__b1175__JW1164	mrdA__b0635__JW0630	-29.0691
ubiE__b3833__JW5581	fabZ__b0180__JW0175	-29.0181
ggt__b3447__JW3412	entC__b0593__JW0585	-28.9441
yhcB__b3233__JW5539	ydiD__b1701__JW5910	-28.9313
htrL__b3618__JW5644	hflX__b4173__JW4131	-28.8865
rfbD__b2040__JW2025	ubiX__b2311__JW2308	-28.8786
wcaB__b2058__JW2043	xerD__b2894__JW2862	-28.8641
dicF__b1574__UNKW3110	galT__b0758__JW0741	-28.8258
cydA__b0733__JW0722	yaiT__b0371__JW0362	-28.7951
folE__b2153__JW2140	ftsE__b3463__JW3428	-28.6776
yfgA__b2516__JW2500	mreD__b3249__JW3218	-28.6766
blr__b4409__JW5963	rpmA__b3185__JW3152	-28.6198
tar__b1886__JW1875	ackA__b2296__JW2293	-28.6082
blr__b4409__JW5963	chiA__b3338__JW3300	-28.6053
rybB__b4417__UNKW3110	sohA__b3129__JW3098	-28.6044
tatB__b3838__JW5580	ybeD__b0631__JW0626	-28.5943
cydA__b0733__JW0722	mipA__b1782__JW1771	-28.5547
yajC__b0407__JW0397	secY__b3300__JW3262	-28.4211
glpB__b2242__JW2236	yiiD__b3888__JW3859	-28.4204
ggt__b3447__JW3412	yjcD__b4064__JW4025	-28.3896
ybgF__b0742__JW0732	acpP__b1094__JW1080	-28.3495
folD__b0529__JW0518	ubiB__b3835__JW3812	-28.3252
era__b2566__JW2550	lpxH__b0524__JW0513	-28.2303
blr__b4409__JW5963	panB__b0134__JW0130	-28.203
ompN__b1377__JW1371	acrF__b3266__JW3234	-28.1459
yhcB__b3233__JW5539	ubiB__b3835__JW3812	-28.1433
glmS__b3729__JW3707	csrA__b2696__JW2666	-28.1159
ybiO__b0808__JW5108	spoT__b3650__JW3625	-28.0367
yfbF__b2254__JW2248	xerD__b2894__JW2862	-28.0253
ompW__b1256__JW1248	rplW__b3318__JW3280	-27.9762
era__b2566__JW2550	yrbB__b3191__JW5535	-27.9709
yjgK__b4252__JW5756	coaD__b3634__JW3609	-27.9698
yhcB__b3233__JW5539	ybfM__b0681__JW0667	-27.9629
purB__b1131__JW1117	rfaE__b3052__JW3024	-27.8898
ydiD__b1701__JW5910	ispE__b1208__JW1199	-27.8626
ybaY__b0453__JW0443	gspH__b3329__JW3291	-27.8142
yajC__b0407__JW0397	ubiB__b3835__JW3812	-27.7382
secF__b0409__JW0399	yaeT__b0177__JW0172	-27.703
yhcB__b3233__JW5539	plsB__b4041__JW4001	-27.667
yiiU__b3928__JW3899	yhcB__b3233__JW5539	-27.655
lspA__b0027__JW0025	murD__b0088__JW0086	-27.6517
yjgP__b4261__JW4218	ugd__b2028__JW2010	-27.638
glpK__b3926__JW3897	mreD__b3249__JW3218	-27.5978
ydhJ__b1644__JW1636	ubiE__b3833__JW5581	-27.5633
entF__b0586__JW0578	agaS__b3136__JW3105	-27.5402
blr__b4409__JW5963	yjjA__b4360__JW5795	-27.4891
tar__b1886__JW1875	sohA__b3129__JW3098	-27.4754
yjjA__b4360__JW5795	minD__b1175__JW1164	-27.4515
pssA__b2585__JW2569	ttk__b3641__JW5641	-27.3767
lolE__b1118__JW1104	ybeD__b0631__JW0626	-27.3444
yjcH__b4068__JW4029	xerD__b2894__JW2862	-27.3139
secF__b0409__JW0399	coaD__b3634__JW3609	-27.3115
murC__b0091__JW0089	ftsE__b3463__JW3428	-27.2782
yaeT__b0177__JW0172	murD__b0088__JW0086	-27.2638
kdsC__b3198__JW3165	wza__b2062__JW2047	-27.2215
frlB__b3371__JW5700	rffM__b3794__JW3770	-27.2101
yfbF__b2254__JW2248	gmhB__b0200__JW0196	-27.1821
accA__b0185__JW0180	ydeT__b1505__JW1499	-27.1619
glmS__b3729__JW3707	ybhO__b0789__JW0772	-27.1393
mtgA__b3208__JW3175	ftsE__b3463__JW3428	-27.1267
acrE__b3265__JW3233	rffT__b4404__JW5596	-27.1118
cyoA__b0432__JW0422	kdsC__b3198__JW3165	-27.1014
ynbB__b1409__JW1406	yjiO__b4337__JW4300	-27.0731
yhcB__b3233__JW5539	yfaZ__b2250__JW5371	-27.0654
acpP__b1094__JW1080	crcB__b0624__JW0619	-27.0617
secY__b3300__JW3262	rfbC__b2038__JW2023	-27.053
ydiD__b1701__JW5910	yeaY__b1806__JW1795	-27.0522
glpB__b2242__JW2236	yraJ__b3144__JW3113	-27.0486
mrcA__b3396__JW3359	ydhK__b1645__JW1637	-27.0399
wcaB__b2058__JW2043	ygeR__b2865__JW2833	-27.015
wzc__b2060__JW2045	nfrB__b0569__JW0558	-27.0141
glpB__b2242__JW2236	yccS__b0960__JW5128	-26.9981
glmS__b3729__JW3707	napD__b2207__JW2195	-26.998
yfiO__b2595__JW2577	cydA__b0733__JW0722	-26.9954
acrF__b3266__JW3234	xerD__b2894__JW2862	-26.9614
kdsA__b1215__JW1206	ftsZ__b0095__JW0093	-26.9475
rfaE__b3052__JW3024	wza__b2062__JW2047	-26.93
kdtA__b3633__JW3608	pal__b0741__JW0731	-26.9265
wzc__b2060__JW2045	yhcB__b3233__JW5539	-26.9014
purB__b1131__JW1117	ubiE__b3833__JW5581	-26.8983
mviN__b1069__JW1056	tolC__b3035__JW5503	-26.8854
acpP__b1094__JW1080	yaiS__b0364__JW0356	-26.8773
exbB__b3006__JW2974	yfdV__b2372__JW2369	-26.8724
asmA__b2064__JW2049	sohA__b3129__JW3098	-26.8704
yjgK__b4252__JW5756	xerD__b2894__JW2862	-26.8599
lpxB__b0182__JW0177	ftsE__b3463__JW3428	-26.8465
mrcA__b3396__JW3359	ftsZ__b0095__JW0093	-26.8255
glmS__b3729__JW3707	ytfF__b4210__JW4168	-26.8236
yehU__b2126__JW5353	nanA__b3225__JW3194	-26.802
kdsA__b1215__JW1206	ydjE__b1769__JW1758	-26.7939
ycaR__b0917__JW0900	acrA__b0463__JW0452	-26.7809
yajC__b0407__JW0397	yrbB__b3191__JW5535	-26.7689
folD__b0529__JW0518	yaeT__b0177__JW0172	-26.7562
dipZ__b4136__JW5734	folD__b0529__JW0518	-26.749
glpB__b2242__JW2236	ycaI__b0913__JW5120	-26.717
yehU__b2126__JW5353	ybbY__b0513__JW0501	-26.7108
glpK__b3926__JW3897	yaeT__b0177__JW0172	-26.7008
btuB__b3966__JW3938	dxs__b0420__JW0410	-26.6728
mltC__b2963__JW5481	ispE__b1208__JW1199	-26.6719
ggt__b3447__JW3412	ydeT__b1505__JW1499	-26.6691
ybiV__b0822__JW0806	coaD__b3634__JW3609	-26.6547
nlpB__b2477__JW2462	yfbG__b2255__JW2249	-26.6483
mepA__b2328__JW2325	yhiI__b3487__JW3454	-26.6306
cyoA__b0432__JW0422	lpxD__b0179__JW0174	-26.6181
oppD__b1246__JW1238	metK__b2942__JW2909	-26.6173
yiaV__b3586__JW3558	coaD__b3634__JW3609	-26.6169
yehT__b2125__JW5352	wza__b2062__JW2047	-26.6082
aaeA__b3241__JW3210	ispE__b1208__JW1199	-26.5995
fabH__b1091__JW1077	ttk__b3641__JW5641	-26.5974
glmS__b3729__JW3707	coaD__b3634__JW3609	-26.5966
murD__b0088__JW0086	hsrA__b3754__JW3733	-26.5829
minD__b1175__JW1164	ftsK__b0890__JW0873	-26.5825
ftsX__b3462__JW3427	murI__b3967__JW5550	-26.5756
kdtA__b3633__JW3608	lpxH__b0524__JW0513	-26.5705
purB__b1131__JW1117	secA__b0098__JW0096	-26.5603
yfiO__b2595__JW2577	xerD__b2894__JW2862	-26.5559
oppD__b1246__JW1238	smpA__b2617__JW2598	-26.5512
dicF__b1574__UNKW3110	yfbG__b2255__JW2249	-26.5499
cusC__b0572__JW0561	lolE__b1118__JW1104	-26.5487
ydgR__b1634__JW1626	ldcA__b1192__JW1181	-26.5306
wbbK__b2032__JW2017	lpxB__b0182__JW0177	-26.5243
panE__b0425__JW0415	zipA__b2412__JW2404	-26.5042
bcsB__b3532__JW3500	lpxD__b0179__JW0174	-26.4866
zipA__b2412__JW2404	mdtI__b1599__JW1591	-26.4848
yeiW__b4502__JW5361	dxs__b0420__JW0410	-26.4446
rffA__b3791__JW3765	ydgR__b1634__JW1626	-26.4274
htrL__b3618__JW5644	mukB__b0924__JW0907	-26.4049
glpB__b2242__JW2236	nlpC__b1708__JW1698	-26.3991
oppB__b1244__JW1236	lolC__b1116__JW5161	-26.3933
frlB__b3371__JW5700	yhjE__b3523__JW3491	-26.389
oppD__b1246__JW1238	tatC__b3839__JW3815	-26.3868
glpB__b2242__JW2236	amiC__b2817__JW5449	-26.3848
asmA__b2064__JW2049	ispA__b0421__JW0411	-26.3553
folA__b0048__JW0047	yihA__b3865__JW5930	-26.3421
eno__b2779__JW2750	wcaM__b2043__JW2028	-26.3394
glpB__b2242__JW2236	ompW__b1256__JW1248	-26.3194
yhcB__b3233__JW5539	zipA__b2412__JW2404	-26.3162
zipA__b2412__JW2404	yfbG__b2255__JW2249	-26.3073
ydiD__b1701__JW5910	yddL__b1472__JW1468	-26.2957
secF__b0409__JW0399	ftsE__b3463__JW3428	-26.2661
dxs__b0420__JW0410	yaiO__b0358__JW0349	-26.2558
secF__b0409__JW0399	ybgH__b0709__JW0699	-26.2524
arcB__b3210__JW5536	dxs__b0420__JW0410	-26.2429
yhcB__b3233__JW5539	secY__b3300__JW3262	-26.2421
caiC__b0037__JW0036	aaeB__b3240__JW3209	-26.2373
mviN__b1069__JW1056	ycfP__b1108__JW5158	-26.2349
ispE__b1208__JW1199	lolE__b1118__JW1104	-26.2292
slt__b4392__JW4355	sugE__b4148__JW5738	-26.2226
glpB__b2242__JW2236	yjdL__b4130__JW4091	-26.2123
yajC__b0407__JW0397	yihA__b3865__JW5930	-26.2118
yeiW__b4502__JW5361	lolA__b0891__JW0874	-26.2056
yehT__b2125__JW5352	ydhC__b1660__JW1652	-26.1969
panD__b0131__JW0127	acrF__b3266__JW3234	-26.195
lolE__b1118__JW1104	motA__b1890__JW1879	-26.1553
pbpG__b2134__JW5355	rplW__b3318__JW3280	-26.1481
emrB__b2686__JW2661	yjhB__b4279__JW5768	-26.1457
blr__b4409__JW5963	rfbA__b2039__JW2024	-26.1255
folD__b0529__JW0518	murD__b0088__JW0086	-26.1114
yfcX__b2341__JW2338	ydfJ__b1543__JW1536	-26.1092
wzc__b2060__JW2045	coaD__b3634__JW3609	-26.1048
nanA__b3225__JW3194	phoE__b0241__JW0231	-26.0899
ubiE__b3833__JW5581	yfaL__b2233__JW2227	-26.0561
ispD__b2747__JW2717	murD__b0088__JW0086	-26.0535
wzc__b2060__JW2045	yidK__b3679__JW3655	-26.0514
omrA__b4444__UNKW3110	lpxB__b0182__JW0177	-26.0483
kdtA__b3633__JW3608	zipA__b2412__JW2404	-26.0419
fepG__b0589__JW0581	tolQ__b0737__JW0727	-26.0298
yfaZ__b2250__JW5371	mdtI__b1599__JW1591	-26.0109
glmS__b3729__JW3707	wcaB__b2058__JW2043	-26.0036
yafL__b0227__JW0217	ftsE__b3463__JW3428	-26.0027
folE__b2153__JW2140	cusB__b0574__JW0563	-25.9997
purB__b1131__JW1117	murB__b3972__JW3940	-25.9991
nlpB__b2477__JW2462	folE__b2153__JW2140	-25.9705
mtgA__b3208__JW3175	yccS__b0960__JW5128	-25.9623
blr__b4409__JW5963	yhiI__b3487__JW3454	-25.9435
dsbB__b1185__JW5182	wbbI__b2034__JW2019	-25.9417
glpB__b2242__JW2236	dppB__b3543__JW3512	-25.934
ubiE__b3833__JW5581	dxr__b0173__JW0168	-25.9237
yraP__b3150__JW3119	hlpA__b0178__JW0173	-25.9165
blr__b4409__JW5963	motA__b1890__JW1879	-25.896
ispD__b2747__JW2717	yfcX__b2341__JW2338	-25.8689
blr__b4409__JW5963	yfdG__b2350__JW2346	-25.8569
secY__b3300__JW3262	xerC__b3811__JW3784	-25.8567
ydiD__b1701__JW5910	mdlA__b0448__JW0438	-25.8504
nanA__b3225__JW3194	yaiT__b0371__JW0362	-25.8502
accA__b0185__JW0180	dxs__b0420__JW0410	-25.846
sbmA__b0377__JW0368	yfcX__b2341__JW2338	-25.8389
wcaC__b2057__JW2042	yidK__b3679__JW3655	-25.8267
nlpB__b2477__JW2462	fepG__b0589__JW0581	-25.8159
yhcB__b3233__JW5539	yddB__b1495__JW1490	-25.7984
mepA__b2328__JW2325	ygfU__b2888__JW5470	-25.7922
cheA__b1888__JW1877	minD__b1175__JW1164	-25.7892
eno__b2779__JW2750	sohA__b3129__JW3098	-25.7712
frlB__b3371__JW5700	paaE__b1392__JW1387	-25.7663
folE__b2153__JW2140	kdsA__b1215__JW1206	-25.7579
imp__b0054__JW0053	folD__b0529__JW0518	-25.7499
folE__b2153__JW2140	lpxB__b0182__JW0177	-25.7458
murD__b0088__JW0086	yjcD__b4064__JW4025	-25.7382
blr__b4409__JW5963	tolR__b0738__JW0728	-25.7331
yjcH__b4068__JW4029	rffM__b3794__JW3770	-25.7324
lpxB__b0182__JW0177	gspA__b3323__JW3285	-25.7249
yidC__b3705__JW3683	fabG__b1093__JW1079	-25.7199
kdsA__b1215__JW1206	cpxP__b3913__JW5558	-25.7123
htrL__b3618__JW5644	yjcD__b4064__JW4025	-25.7113
aaeA__b3241__JW3210	ubiF__b0662__JW0659	-25.7109
ycfP__b1108__JW5158	rpoS__b2741__JW5437	-25.674
yhcB__b3233__JW5539	panC__b0133__JW0129	-25.6708
tolQ__b0737__JW0727	yohG__b2138__JW5838	-25.665
galU__b1236__JW1224	entF__b0586__JW0578	-25.6601
mviN__b1069__JW1056	ftsL__b0083__JW0081	-25.6499
galK__b0757__JW0740	yhjE__b3523__JW3491	-25.6476
acpP__b1094__JW1080	yddW__b1491__JW1486	-25.6415
dsbB__b1185__JW5182	aaeB__b3240__JW3209	-25.6361
yhcB__b3233__JW5539	ftsK__b0890__JW0873	-25.633
aaeB__b3240__JW3209	lolE__b1118__JW1104	-25.6285
folE__b2153__JW2140	ispE__b1208__JW1199	-25.6161
cyoB__b0431__JW0421	acrA__b0463__JW0452	-25.6086
emrA__b2685__JW2660	wcaC__b2057__JW2042	-25.5857
purB__b1131__JW1117	yliI__b0837__JW0821	-25.5723
glmS__b3729__JW3707	yaiU__b0374__JW5051	-25.5715
ytfM__b4220__JW4179	ftsZ__b0095__JW0093	-25.5677
yiaV__b3586__JW3558	yihA__b3865__JW5930	-25.5667
glpB__b2242__JW2236	frdC__b4152__JW4113	-25.5666
micF__b4439__UNKW3110	ldcA__b1192__JW1181	-25.5623
ydiD__b1701__JW5910	ydhO__b1655__JW5270	-25.5622
yajC__b0407__JW0397	ubiD__b3843__JW3819	-25.5614
kdsC__b3198__JW3165	yhfK__b3358__JW5701	-25.5536
yjgP__b4261__JW4218	rfaJ__b3626__JW3601	-25.5443
blr__b4409__JW5963	ycfN__b1106__JW1092	-25.5415
folC__b2315__JW2312	minD__b1175__JW1164	-25.5369
yfbE__b2253__JW5372	frdA__b4154__JW4115	-25.5293
amiB__b4169__JW4127	sohA__b3129__JW3098	-25.5249
rybB__b4417__UNKW3110	rpoS__b2741__JW5437	-25.5223
rfaC__b3621__JW3596	fepB__b0592__JW0584	-25.5166
yaeT__b0177__JW0172	fepG__b0589__JW0581	-25.5158
yhcB__b3233__JW5539	slt__b4392__JW4355	-25.5072
yeiW__b4502__JW5361	tatC__b3839__JW3815	-25.5012
yhcB__b3233__JW5539	ycaD__b0898__JW0881	-25.4919
mviN__b1069__JW1056	fepA__b0584__JW5086	-25.4768
minD__b1175__JW1164	fabA__b0954__JW0937	-25.4758
yhcB__b3233__JW5539	ubiF__b0662__JW0659	-25.4642
lpxK__b0915__JW0898	yaeT__b0177__JW0172	-25.4571
minE__b1174__JW1163	folD__b0529__JW0518	-25.4553
macA__b0878__JW0862	ggt__b3447__JW3412	-25.4488
murB__b3972__JW3940	csrA__b2696__JW2666	-25.4423
yajC__b0407__JW0397	yhcB__b3233__JW5539	-25.4421
nanA__b3225__JW3194	dacB__b3182__JW3149	-25.4335
rfaY__b3625__JW3600	nlpB__b2477__JW2462	-25.4203
yfcX__b2341__JW2338	fepB__b0592__JW0584	-25.3935
kdsC__b3198__JW3165	xerD__b2894__JW2862	-25.3903
murC__b0091__JW0089	ydeE__b1534__JW1527	-25.3878
yfiB__b2605__JW2586	wcaC__b2057__JW2042	-25.3858
blr__b4409__JW5963	yhcB__b3233__JW5539	-25.3614
exbD__b3005__JW2973	yhbN__b3200__JW3167	-25.3594
fabZ__b0180__JW0175	rplW__b3318__JW3280	-25.35
yjgK__b4252__JW5756	lpxC__b0096__JW0094	-25.3497
cls__b1249__JW1241	ubiB__b3835__JW3812	-25.333
nlpB__b2477__JW2462	rplW__b3318__JW3280	-25.3228
entF__b0586__JW0578	yhcB__b3233__JW5539	-25.3217
yeiR__b2173__JW2161	murI__b3967__JW5550	-25.3164
minE__b1174__JW1163	yccS__b0960__JW5128	-25.3071
ispA__b0421__JW0411	murD__b0088__JW0086	-25.3018
lolA__b0891__JW0874	yaiP__b0363__JW0355	-25.3007
yfcX__b2341__JW2338	ispE__b1208__JW1199	-25.2733
wcaB__b2058__JW2043	smpA__b2617__JW2598	-25.2693
yiiU__b3928__JW3899	dxs__b0420__JW0410	-25.2652
fabI__b1288__JW1281	murD__b0088__JW0086	-25.2609
gspG__b3328__JW3290	ispE__b1208__JW1199	-25.259
lpxD__b0179__JW0174	mdtJ__b1600__JW1592	-25.2544
blr__b4409__JW5963	yhgE__b3402__JW3365	-25.2535
nlpB__b2477__JW2462	lolA__b0891__JW0874	-25.2512
yajC__b0407__JW0397	ftsE__b3463__JW3428	-25.2497
secF__b0409__JW0399	murB__b3972__JW3940	-25.2487
rfaG__b3631__JW3606	mreD__b3249__JW3218	-25.2473
mepA__b2328__JW2325	smpA__b2617__JW2598	-25.2311
blr__b4409__JW5963	rhsA__b3593__JW3566	-25.2227
mreC__b3250__JW3219	zipA__b2412__JW2404	-25.2077
acrA__b0463__JW0452	spy__b1743__JW1732	-25.2036
tatC__b3839__JW3815	yfhM__b2520__JW2504	-25.1971
rfaE__b3052__JW3024	blr__b4409__JW5963	-25.1943
dicF__b1574__UNKW3110	yiaF__b3554__JW5655	-25.1923
cydA__b0733__JW0722	ydeT__b1505__JW1499	-25.1832
yehU__b2126__JW5353	mdlB__b0449__JW5061	-25.181
acpS__b2563__JW2547	ompX__b0814__JW0799	-25.1757
secA__b0098__JW0096	folA__b0048__JW0047	-25.171
minD__b1175__JW1164	mraY__b0087__JW0085	-25.1675
wzyE__b3793__JW3769	fepG__b0589__JW0581	-25.1649
rssA__b1234__JW1222	folA__b0048__JW0047	-25.1643
dacB__b3182__JW3149	fcl__b2052__JW2037	-25.1603
wzc__b2060__JW2045	ispE__b1208__JW1199	-25.1537
minD__b1175__JW1164	tolA__b0739__JW0729	-25.1425
kdtA__b3633__JW3608	gspA__b3323__JW3285	-25.1299
cfa__b1661__JW1653	murD__b0088__JW0086	-25.1295
fepG__b0589__JW0581	lpxD__b0179__JW0174	-25.1265
asmA__b2064__JW2049	cycA__b4208__JW4166	-25.1211
caiC__b0037__JW0036	mreC__b3250__JW3219	-25.1182
ydgR__b1634__JW1626	yeeF__b2014__JW5330	-25.1173
aaeB__b3240__JW3209	kdtA__b3633__JW3608	-25.1128
tar__b1886__JW1875	era__b2566__JW2550	-25.1042
btuB__b3966__JW3938	mltC__b2963__JW5481	-25.1025
folA__b0048__JW0047	mdtK__b1663__JW1655	-25.099
wzc__b2060__JW2045	panF__b3258__JW3226	-25.0977
zipA__b2412__JW2404	yhjE__b3523__JW3491	-25.0969
murF__b0086__JW0084	zipA__b2412__JW2404	-25.0953
yhcB__b3233__JW5539	mipA__b1782__JW1771	-25.0931
yfcX__b2341__JW2338	ompX__b0814__JW0799	-25.092
secF__b0409__JW0399	minD__b1175__JW1164	-25.0876
mdoG__b1048__JW1035	accC__b3256__JW3224	-25.0869
kdsC__b3198__JW3165	wcaM__b2043__JW2028	-25.0737
acrA__b0463__JW0452	murF__b0086__JW0084	-25.0699
mpaA__b1326__JW1319	ftsZ__b0095__JW0093	-25.0653
rffT__b4404__JW5596	gspA__b3323__JW3285	-25.05
rybB__b4417__UNKW3110	mrcB__b0149__JW0145	-25.0433
ggt__b3447__JW3412	fimD__b4317__JW5780	-25.0408
zipA__b2412__JW2404	yjcE__b4065__JW4026	-25.0368
yehT__b2125__JW5352	rfaI__b3627__JW3602	-25.0326
mltC__b2963__JW5481	tolR__b0738__JW0728	-25.0256
hflK__b4174__JW4132	fhuD__b0152__JW0148	-25.025
phoE__b0241__JW0231	xerC__b3811__JW3784	-25.0242
dacB__b3182__JW3149	rplW__b3318__JW3280	-25.0201
wbbK__b2032__JW2017	lpxA__b0181__JW0176	-25.02
yejO__b2190__JW5839	yaeF__b0193__JW5016	-25.0173
lolC__b1116__JW5161	yidE__b3685__JW3662	-25.0137
ydiD__b1701__JW5910	yicO__b3664__JW5636	-25.0086
oppD__b1246__JW1238	cfa__b1661__JW1653	-25.0027
nlpD__b2742__JW2712	yjeM__b4156__JW5739	-24.9899
btuB__b3966__JW3938	hflC__b4175__JW4133	-24.9887
ggt__b3447__JW3412	cheW__b1887__JW1876	-24.9826
accA__b0185__JW0180	purB__b1131__JW1117	-24.9718
glpB__b2242__JW2236	entA__b0596__JW0588	-24.9596
blr__b4409__JW5963	tpx__b1324__JW1317	-24.9556
zipA__b2412__JW2404	fepB__b0592__JW0584	-24.9514
micC__b4427__UNKW3110	ttk__b3641__JW5641	-24.9489
bcsA__b3533__JW5665	wcaC__b2057__JW2042	-24.9485
secY__b3300__JW3262	yjcD__b4064__JW4025	-24.9474
yihA__b3865__JW5930	mepA__b2328__JW2325	-24.9437
yidC__b3705__JW3683	kdsA__b1215__JW1206	-24.9415
kdsA__b1215__JW1206	tolA__b0739__JW0729	-24.9322
folA__b0048__JW0047	yajC__b0407__JW0397	-24.9268
kdtA__b3633__JW3608	yrbB__b3191__JW5535	-24.9141
damX__b3388__JW3351	pgsA__b1912__JW1897	-24.9106
nanA__b3225__JW3194	ygeR__b2865__JW2833	-24.909
maoC__b1387__JW1382	rplW__b3318__JW3280	-24.9044
glmU__b3730__JW3708	yajC__b0407__JW0397	-24.9023
mreD__b3249__JW3218	mepA__b2328__JW2325	-24.901
yfaZ__b2250__JW5371	yjeM__b4156__JW5739	-24.8987
yjiY__b4354__JW5791	yhhS__b3473__JW5945	-24.897
kdtA__b3633__JW3608	wcaB__b2058__JW2043	-24.8965
glpB__b2242__JW2236	ybjJ__b0845__JW0829	-24.8957
yhcB__b3233__JW5539	ftsZ__b0095__JW0093	-24.8944
micF__b4439__UNKW3110	yhiM__b3491__JW5944	-24.8933
dicF__b1574__UNKW3110	ycbC__b0920__JW0903	-24.8917
wcaC__b2057__JW2042	gspM__b3334__JW5704	-24.8881
ytfM__b4220__JW4179	ubiB__b3835__JW3812	-24.8737
yhcB__b3233__JW5539	csgG__b1037__JW1020	-24.8729
bcsB__b3532__JW3500	frdD__b4151__JW4112	-24.872
dacB__b3182__JW3149	ydiD__b1701__JW5910	-24.8699
glpK__b3926__JW3897	lolA__b0891__JW0874	-24.8529
yhcB__b3233__JW5539	dacA__b0632__JW0627	-24.8476
ytfM__b4220__JW4179	minD__b1175__JW1164	-24.846
ycjG__b1325__JW1318	ybcH__b0567__JW0556	-24.8406
rfaE__b3052__JW3024	lolE__b1118__JW1104	-24.8308
wzc__b2060__JW2045	ygeR__b2865__JW2833	-24.8288
yfgL__b2512__JW2496	acpP__b1094__JW1080	-24.8263
pta__b2297__JW2294	kdsA__b1215__JW1206	-24.8236
bcsB__b3532__JW3500	mukB__b0924__JW0907	-24.8215
rplU__b3186__JW3153	cheA__b1888__JW1877	-24.8188
minD__b1175__JW1164	lpxK__b0915__JW0898	-24.8187
aaeB__b3240__JW3209	murB__b3972__JW3940	-24.8103
ampD__b0110__JW0106	ftsE__b3463__JW3428	-24.8091
entF__b0586__JW0578	amiA__b2435__JW2428	-24.8088
hofC__b0106__JW0102	ftsE__b3463__JW3428	-24.7986
yceG__b1097__JW1083	caiT__b0040__JW0039	-24.7978
glpK__b3926__JW3897	murF__b0086__JW0084	-24.7971
glmS__b3729__JW3707	ymcA__b0984__JW0967	-24.7931
wcaB__b2058__JW2043	yjcR__b4082__JW4043	-24.7876
rfbD__b2040__JW2025	ggt__b3447__JW3412	-24.7871
ubiB__b3835__JW3812	fadD__b1805__JW1794	-24.7861
folA__b0048__JW0047	fepG__b0589__JW0581	-24.7849
ubiB__b3835__JW3812	ugd__b2028__JW2010	-24.783
minD__b1175__JW1164	yafL__b0227__JW0217	-24.7797
mscS__b2924__JW2891	dxs__b0420__JW0410	-24.7701
ftsH__b3178__JW3145	cls__b1249__JW1241	-24.763
nlpB__b2477__JW2462	glpQ__b2239__JW2233	-24.7626
caiC__b0037__JW0036	yhgE__b3402__JW3365	-24.7623
yfaL__b2233__JW2227	fdrA__b0518__JW0506	-24.7611
yeiR__b2173__JW2161	yjcR__b4082__JW4043	-24.7587
lpxH__b0524__JW0513	yafL__b0227__JW0217	-24.7577
ggt__b3447__JW3412	wza__b2062__JW2047	-24.7507
mtgA__b3208__JW3175	ampD__b0110__JW0106	-24.7486
oxyS__b4458__UNKW3110	yhcB__b3233__JW5539	-24.7409
blr__b4409__JW5963	murD__b0088__JW0086	-24.7352
dsbB__b1185__JW5182	rfaS__b3629__JW3604	-24.7331
rybB__b4417__UNKW3110	ygcS__b2771__JW5845	-24.727
cusC__b0572__JW0561	ydiD__b1701__JW5910	-24.7261
nanA__b3225__JW3194	yqhH__b3014__JW2982	-24.7208
etp__b0982__JW5132	mipA__b1782__JW1771	-24.7203
rfaP__b3630__JW3605	ubiB__b3835__JW3812	-24.7189
glmS__b3729__JW3707	ispU__b0174__JW0169	-24.7168
birA__b3973__JW3941	kdsA__b1215__JW1206	-24.6856
wcaC__b2057__JW2042	yceK__b1050__JW5151	-24.6698
mdoB__b4359__JW5794	yajC__b0407__JW0397	-24.6669
wzyE__b3793__JW3769	yidK__b3679__JW3655	-24.6635
glmU__b3730__JW3708	murD__b0088__JW0086	-24.6633
fliR__b1950__JW1934	yjeP__b4159__JW4120	-24.6614
micC__b4427__UNKW3110	rffA__b3791__JW3765	-24.6576
yhcB__b3233__JW5539	ydeE__b1534__JW1527	-24.6574
lpxD__b0179__JW0174	yfbJ__b2258__JW5373	-24.6524
ygiH__b3059__JW3031	ldcA__b1192__JW1181	-24.6486
wcaM__b2043__JW2028	lolE__b1118__JW1104	-24.6474
eno__b2779__JW2750	pgpB__b1278__JW1270	-24.6461
murD__b0088__JW0086	ftsE__b3463__JW3428	-24.6435
ydhO__b1655__JW5270	secD__b0408__JW0398	-24.6429
wcaC__b2057__JW2042	yccS__b0960__JW5128	-24.6419
fabZ__b0180__JW0175	cls__b1249__JW1241	-24.6417
blr__b4409__JW5963	ftsK__b0890__JW0873	-24.6345
wza__b2062__JW2047	ftsZ__b0095__JW0093	-24.6303
yfcX__b2341__JW2338	yjeM__b4156__JW5739	-24.6264
fabB__b2323__JW2320	yifK__b3795__JW5595	-24.6249
mdtE__b3513__JW3481	ispE__b1208__JW1199	-24.6247
mdoG__b1048__JW1035	lolE__b1118__JW1104	-24.6214
dsbB__b1185__JW5182	fepA__b0584__JW5086	-24.6176
slt__b4392__JW4355	glmS__b3729__JW3707	-24.6065
blr__b4409__JW5963	yqcE__b2775__JW2746	-24.6025
ybiV__b0822__JW0806	yrbB__b3191__JW5535	-24.5985
yihA__b3865__JW5930	gspO__b3335__JW3297	-24.5937
glpB__b2242__JW2236	yiaT__b3584__JW3556	-24.5888
wza__b2062__JW2047	ybbC__b0498__JW0487	-24.5869
ytfM__b4220__JW4179	dxs__b0420__JW0410	-24.5852
mtgA__b3208__JW3175	fepB__b0592__JW0584	-24.5793
glmS__b3729__JW3707	yaiO__b0358__JW0349	-24.5733
yeiW__b4502__JW5361	gidB__b3740__JW3718	-24.5688
rfbA__b2039__JW2024	murD__b0088__JW0086	-24.5668
rne__b1084__JW1071	yfeO__b2389__JW2386	-24.5668
glmU__b3730__JW3708	hofC__b0106__JW0102	-24.5573
acpP__b1094__JW1080	ydcL__b1431__JW1427	-24.5549
blr__b4409__JW5963	lpxM__b1855__JW1844	-24.5549
cld__b2027__JW5836	aaeB__b3240__JW3209	-24.5417
hflX__b4173__JW4131	ampH__b0376__JW5052	-24.5406
yfcX__b2341__JW2338	yhiM__b3491__JW5944	-24.5384
secF__b0409__JW0399	ubiE__b3833__JW5581	-24.5337
yeiW__b4502__JW5361	rplW__b3318__JW3280	-24.5327
yjgK__b4252__JW5756	ispU__b0174__JW0169	-24.5287
cyoB__b0431__JW0421	sohA__b3129__JW3098	-24.5277
entF__b0586__JW0578	yjcR__b4082__JW4043	-24.5195
htrL__b3618__JW5644	yjeP__b4159__JW4120	-24.5182
murC__b0091__JW0089	yicJ__b3657__JW5939	-24.518
kdtA__b3633__JW3608	lolB__b1209__JW1200	-24.5176
oxyS__b4458__UNKW3110	agaS__b3136__JW3105	-24.5153
ubiB__b3835__JW3812	yfcY__b2342__JW2339	-24.515
glpB__b2242__JW2236	panF__b3258__JW3226	-24.5145
ftsQ__b0093__JW0091	ttk__b3641__JW5641	-24.5016
mtgA__b3208__JW3175	rffH__b3789__JW3763	-24.4973
yehT__b2125__JW5352	ydiN__b1691__JW5274	-24.4942
yajC__b0407__JW0397	minD__b1175__JW1164	-24.4884
rfaE__b3052__JW3024	minD__b1175__JW1164	-24.4884
rfaE__b3052__JW3024	ydeK__b1510__JW1503	-24.4841
mdtE__b3513__JW3481	pldB__b3825__JW5584	-24.4826
kdsD__b3197__JW3164	lolA__b0891__JW0874	-24.4807
oxyS__b4458__UNKW3110	ybjL__b0847__JW0831	-24.4757
yhcB__b3233__JW5539	dacC__b0839__JW0823	-24.4745
mepA__b2328__JW2325	mraY__b0087__JW0085	-24.472
yceG__b1097__JW1083	gspA__b3323__JW3285	-24.4719
murG__b0090__JW0088	ybgC__b0736__JW0726	-24.47
pbpG__b2134__JW5355	ycfN__b1106__JW1092	-24.4655
tap__b1885__JW1874	acpP__b1094__JW1080	-24.464
murG__b0090__JW0088	gspE__b3326__JW3288	-24.462
minE__b1174__JW1163	dxs__b0420__JW0410	-24.46
yhcB__b3233__JW5539	lpxK__b0915__JW0898	-24.4578
yfaZ__b2250__JW5371	cpsG__b2048__JW2033	-24.457
fadE__b0221__JW5020	yajG__b0434__JW0424	-24.4542
exbD__b3005__JW2973	dacC__b0839__JW0823	-24.4532
glpB__b2242__JW2236	yggU__b2953__JW5479	-24.4523
slt__b4392__JW4355	bglH__b3720__JW3698	-24.4521
murB__b3972__JW3940	imp__b0054__JW0053	-24.4513
ubiB__b3835__JW3812	yieG__b3714__JW3692	-24.4473
kdsC__b3198__JW3165	chiA__b3338__JW3300	-24.4464
folA__b0048__JW0047	yhiM__b3491__JW5944	-24.4426
yehT__b2125__JW5352	yraJ__b3144__JW3113	-24.4426
nlpB__b2477__JW2462	yraP__b3150__JW3119	-24.4418
phoE__b0241__JW0231	yddB__b1495__JW1490	-24.4403
ackA__b2296__JW2293	lpxK__b0915__JW0898	-24.44
wcaC__b2057__JW2042	ydeK__b1510__JW1503	-24.4336
yrbB__b3191__JW5535	ygfU__b2888__JW5470	-24.4271
yihA__b3865__JW5930	yaiP__b0363__JW0355	-24.4261
kdtA__b3633__JW3608	ubiX__b2311__JW2308	-24.4248
kdtA__b3633__JW3608	kdsB__b0918__JW0901	-24.4241
glpB__b2242__JW2236	fhuB__b0153__JW0149	-24.4191
mltA__b2813__JW2784	acpP__b1094__JW1080	-24.4121
bcsA__b3533__JW5665	kdsC__b3198__JW3165	-24.4105
zipA__b2412__JW2404	wcaB__b2058__JW2043	-24.4007
ydiD__b1701__JW5910	yaeF__b0193__JW5016	-24.4004
rfaE__b3052__JW3024	oppC__b1245__JW1237	-24.397
fabZ__b0180__JW0175	ypjA__b2647__JW5422	-24.3959
fabI__b1288__JW1281	acpP__b1094__JW1080	-24.3892
lpxC__b0096__JW0094	gspG__b3328__JW3290	-24.3857
oxyS__b4458__UNKW3110	yicJ__b3657__JW5939	-24.3842
rfaE__b3052__JW3024	oppD__b1246__JW1238	-24.3808
yajC__b0407__JW0397	ydhK__b1645__JW1637	-24.3805
yeiW__b4502__JW5361	gspI__b3330__JW5706	-24.3799
ggt__b3447__JW3412	ypjA__b2647__JW5422	-24.3771
ybgC__b0736__JW0726	yjgK__b4252__JW5756	-24.3689
tar__b1886__JW1875	ycfN__b1106__JW1092	-24.3593
yajC__b0407__JW0397	fabZ__b0180__JW0175	-24.3526
dacB__b3182__JW3149	fhuE__b1102__JW1088	-24.3495
hofC__b0106__JW0102	yhjE__b3523__JW3491	-24.3468
micF__b4439__UNKW3110	rfaQ__b3632__JW3607	-24.3464
fabH__b1091__JW1077	nlpB__b2477__JW2462	-24.3447
accC__b3256__JW3224	murD__b0088__JW0086	-24.3441
glpB__b2242__JW2236	ugpB__b3453__JW3418	-24.3376
mdoB__b4359__JW5794	frdD__b4151__JW4112	-24.3372
tolQ__b0737__JW0727	secY__b3300__JW3262	-24.3337
rne__b1084__JW1071	yidC__b3705__JW3683	-24.3283
mltA__b2813__JW2784	wcaA__b2059__JW2044	-24.3282
ubiE__b3833__JW5581	gspG__b3328__JW3290	-24.3274
entF__b0586__JW0578	ydcL__b1431__JW1427	-24.3263
blr__b4409__JW5963	ubiD__b3843__JW3819	-24.3221
yiaV__b3586__JW3558	murF__b0086__JW0084	-24.3219
ycbS__b0940__JW0923	oppD__b1246__JW1238	-24.3214
acpP__b1094__JW1080	ybgH__b0709__JW0699	-24.3199
nanA__b3225__JW3194	yaeF__b0193__JW5016	-24.3189
oppD__b1246__JW1238	ybbY__b0513__JW0501	-24.3163
metK__b2942__JW2909	ybiO__b0808__JW5108	-24.3116
yjiY__b4354__JW5791	yhjX__b3547__JW3516	-24.3099
ffh__b2610__JW5414	fepG__b0589__JW0581	-24.3053
secD__b0408__JW0398	yaeT__b0177__JW0172	-24.3035
glmS__b3729__JW3707	rhsE__b1456__JW1451	-24.3024
folA__b0048__JW0047	yidC__b3705__JW3683	-24.3015
yfaL__b2233__JW2227	yajR__b0427__JW5059	-24.2933
entF__b0586__JW0578	fdrA__b0518__JW0506	-24.2886
yeiR__b2173__JW2161	ypjA__b2647__JW5422	-24.2873
dicF__b1574__UNKW3110	gmd__b2053__JW2038	-24.2804
mreD__b3249__JW3218	panB__b0134__JW0130	-24.2775
nanA__b3225__JW3194	acpP__b1094__JW1080	-24.2772
mreD__b3249__JW3218	yjiO__b4337__JW4300	-24.2751
folD__b0529__JW0518	yrbB__b3191__JW5535	-24.2729
yajC__b0407__JW0397	accC__b3256__JW3224	-24.2723
kdsA__b1215__JW1206	ydeK__b1510__JW1503	-24.2723
kdsC__b3198__JW3165	yadE__b0130__JW0126	-24.269
murC__b0091__JW0089	rfbD__b2040__JW2025	-24.2688
wcaB__b2058__JW2043	folM__b1606__JW1598	-24.2663
yeiW__b4502__JW5361	fabI__b1288__JW1281	-24.2659
nanA__b3225__JW3194	wbbI__b2034__JW2019	-24.2654
ymgF__b4520__JW1156	acpP__b1094__JW1080	-24.2647
acpP__b1094__JW1080	ybjI__b0844__JW5113	-24.2592
murF__b0086__JW0084	ompN__b1377__JW1371	-24.2574
purB__b1131__JW1117	yaeT__b0177__JW0172	-24.2554
oppD__b1246__JW1238	agaS__b3136__JW3105	-24.252
lpxA__b0181__JW0176	yjhA__b4311__JW5778	-24.2467
glpB__b2242__JW2236	plsX__b1090__JW5156	-24.2412
ygiH__b3059__JW3031	ypjA__b2647__JW5422	-24.2409
hflK__b4174__JW4132	hemY__b3802__JW3774	-24.2377
kdsC__b3198__JW3165	zipA__b2412__JW2404	-24.236
rfaS__b3629__JW3604	phoE__b0241__JW0231	-24.2351
yaiO__b0358__JW0349	ydhK__b1645__JW1637	-24.222
folA__b0048__JW0047	murD__b0088__JW0086	-24.2219
rybB__b4417__UNKW3110	yadE__b0130__JW0126	-24.2218
cls__b1249__JW1241	mdtK__b1663__JW1655	-24.2174
fabI__b1288__JW1281	yaiO__b0358__JW0349	-24.2116
minD__b1175__JW1164	ydjE__b1769__JW1758	-24.2082
gspG__b3328__JW3290	fabG__b1093__JW1079	-24.2059
era__b2566__JW2550	rplW__b3318__JW3280	-24.2013
oxyS__b4458__UNKW3110	yhjX__b3547__JW3516	-24.1999
ggt__b3447__JW3412	rplW__b3318__JW3280	-24.1984
mpl__b4233__JW4192	ubiF__b0662__JW0659	-24.1971
yhcB__b3233__JW5539	dacB__b3182__JW3149	-24.197
acpP__b1094__JW1080	yafD__b0209__JW5017	-24.1967
ggt__b3447__JW3412	yicJ__b3657__JW5939	-24.1953
glmS__b3729__JW3707	mdtE__b3513__JW3481	-24.194
zipA__b2412__JW2404	yddW__b1491__JW1486	-24.1901
nlpB__b2477__JW2462	ispE__b1208__JW1199	-24.1893
ftsX__b3462__JW3427	ygbN__b2740__JW2710	-24.1736
yjcH__b4068__JW4029	yihN__b3874__JW3845	-24.1714
lolA__b0891__JW0874	ybcH__b0567__JW0556	-24.1695
blr__b4409__JW5963	treA__b1197__JW1186	-24.1663
mltC__b2963__JW5481	xerD__b2894__JW2862	-24.1603
zipA__b2412__JW2404	agaS__b3136__JW3105	-24.1545
tar__b1886__JW1875	ispA__b0421__JW0411	-24.1524
yohG__b2138__JW5838	sapD__b1291__JW1284	-24.1516
gspO__b3335__JW3297	motA__b1890__JW1879	-24.1483
slt__b4392__JW4355	wcaM__b2043__JW2028	-24.1402
glpB__b2242__JW2236	rfaE__b3052__JW3024	-24.1392
glpB__b2242__JW2236	lpp__b1677__JW1667	-24.1389
mtgA__b3208__JW3175	yedE__b1929__JW1914	-24.1386
acpP__b1094__JW1080	treA__b1197__JW1186	-24.1368
exbD__b3005__JW2973	ackA__b2296__JW2293	-24.1361
yiaV__b3586__JW3558	ispA__b0421__JW0411	-24.1288
wcaM__b2043__JW2028	minD__b1175__JW1164	-24.1284
dicF__b1574__UNKW3110	osmY__b4376__JW4338	-24.1278
yiaV__b3586__JW3558	ispE__b1208__JW1199	-24.1278
acrF__b3266__JW3234	acpP__b1094__JW1080	-24.1273
dicF__b1574__UNKW3110	yihP__b3877__JW3848	-24.1257
rfaE__b3052__JW3024	yfbS__b2292__JW2289	-24.1252
hflK__b4174__JW4132	ypjA__b2647__JW5422	-24.1244
wcaC__b2057__JW2042	spy__b1743__JW1732	-24.1227
minD__b1175__JW1164	secD__b0408__JW0398	-24.1211
rfaE__b3052__JW3024	fiu__b0805__JW0790	-24.1208
pbpG__b2134__JW5355	yfeN__b2408__JW2399	-24.1199
wzc__b2060__JW2045	yeeF__b2014__JW5330	-24.1194
yajC__b0407__JW0397	ftsA__b0094__JW0092	-24.1164
wzc__b2060__JW2045	rhsD__b0497__JW0486	-24.1136
gspG__b3328__JW3290	mraY__b0087__JW0085	-24.1115
gspD__b3325__JW5707	kdsA__b1215__JW1206	-24.1111
acrF__b3266__JW3234	yicO__b3664__JW5636	-24.1109
murI__b3967__JW5550	nlpB__b2477__JW2462	-24.1092
yajC__b0407__JW0397	lpxD__b0179__JW0174	-24.1091
rhsD__b0497__JW0486	yjgK__b4252__JW5756	-24.1049
yjgK__b4252__JW5756	ispE__b1208__JW1199	-24.1012
mepA__b2328__JW2325	minD__b1175__JW1164	-24.0996
glmS__b3729__JW3707	rpmA__b3185__JW3152	-24.0996
micF__b4439__UNKW3110	cpsB__b2049__JW2034	-24.096
mpl__b4233__JW4192	yjdL__b4130__JW4091	-24.0899
wzxC__b2046__JW2031	ggt__b3447__JW3412	-24.0879
murD__b0088__JW0086	ydhC__b1660__JW1652	-24.0877
minE__b1174__JW1163	yaiT__b0371__JW0362	-24.085
secF__b0409__JW0399	yrbB__b3191__JW5535	-24.0846
glmS__b3729__JW3707	accC__b3256__JW3224	-24.0816
btuF__b0158__JW0154	yihA__b3865__JW5930	-24.0725
wcaC__b2057__JW2042	xerD__b2894__JW2862	-24.0716
fepG__b0589__JW0581	yfaL__b2233__JW2227	-24.0712
glmS__b3729__JW3707	lolE__b1118__JW1104	-24.0637
mpaA__b1326__JW1319	yafL__b0227__JW0217	-24.0631
cls__b1249__JW1241	ftsZ__b0095__JW0093	-24.0629
blr__b4409__JW5963	mdtJ__b1600__JW1592	-24.058
yfcX__b2341__JW2338	dacA__b0632__JW0627	-24.0579
ftsX__b3462__JW3427	ubiD__b3843__JW3819	-24.0561
yehT__b2125__JW5352	nanE__b3223__JW3192	-24.0556
ispH__b0029__JW0027	gspG__b3328__JW3290	-24.0529
fepA__b0584__JW5086	cydA__b0733__JW0722	-24.0526
yrbB__b3191__JW5535	murD__b0088__JW0086	-24.052
zipA__b2412__JW2404	yfaL__b2233__JW2227	-24.0446
entE__b0594__JW0586	kdtA__b3633__JW3608	-24.0437
murE__b0085__JW0083	rplW__b3318__JW3280	-24.0389
yejO__b2190__JW5839	mdlB__b0449__JW5061	-24.0324
yfaL__b2233__JW2227	yjeM__b4156__JW5739	-24.0319
ygeD__b2835__JW2803	btuB__b3966__JW3938	-24.0292
rffH__b3789__JW3763	nlpB__b2477__JW2462	-24.0251
fliP__b1948__JW1932	ycfN__b1106__JW1092	-24.0242
purB__b1131__JW1117	lpxC__b0096__JW0094	-24.0169
zipA__b2412__JW2404	ybhO__b0789__JW0772	-24.0154
blr__b4409__JW5963	mltA__b2813__JW2784	-24.0128
coaD__b3634__JW3609	murE__b0085__JW0083	-24.0122
murC__b0091__JW0089	cheB__b1883__JW1872	-24.0089
yiiU__b3928__JW3899	yhjE__b3523__JW3491	-24.0068
yohG__b2138__JW5838	yaiS__b0364__JW0356	-24.0026
folE__b2153__JW2140	lolA__b0891__JW0874	-24.0018
yeiW__b4502__JW5361	lpxM__b1855__JW1844	-24.0017
gcvB__b4443__UNKW3110	ubiC__b4039__JW5713	-23.9992
tar__b1886__JW1875	coaD__b3634__JW3609	-23.9984
murC__b0091__JW0089	yhiM__b3491__JW5944	-23.9975
lamB__b4036__JW3996	glpQ__b2239__JW2233	-23.9947
kdsB__b0918__JW0901	yaiO__b0358__JW0349	-23.9942
yjgK__b4252__JW5756	murB__b3972__JW3940	-23.9879
rfaQ__b3632__JW3607	glpQ__b2239__JW2233	-23.9855
fepA__b0584__JW5086	wcaM__b2043__JW2028	-23.9851
mtgA__b3208__JW3175	yceB__b1063__JW1050	-23.9842
secF__b0409__JW0399	ubiD__b3843__JW3819	-23.9822
gspG__b3328__JW3290	ycaD__b0898__JW0881	-23.9819
entF__b0586__JW0578	yfiB__b2605__JW2586	-23.9812
dsbB__b1185__JW5182	cheA__b1888__JW1877	-23.976
yaiO__b0358__JW0349	ubiB__b3835__JW3812	-23.976
folE__b2153__JW2140	rpmA__b3185__JW3152	-23.9744
gcvB__b4443__UNKW3110	ackA__b2296__JW2293	-23.9743
hflK__b4174__JW4132	btuB__b3966__JW3938	-23.9708
glpB__b2242__JW2236	yeiB__b2152__JW2139	-23.9682
glmS__b3729__JW3707	yfbE__b2253__JW5372	-23.9671
fabZ__b0180__JW0175	ampD__b0110__JW0106	-23.967
wzc__b2060__JW2045	ygfU__b2888__JW5470	-23.9669
glpB__b2242__JW2236	yadE__b0130__JW0126	-23.9667
tatB__b3838__JW5580	oppD__b1246__JW1238	-23.9655
ybbC__b0498__JW0487	yrbK__b3199__JW3166	-23.9653
yfcX__b2341__JW2338	yjcR__b4082__JW4043	-23.9602
mtgA__b3208__JW3175	alr__b4053__JW4013	-23.9582
ubiX__b2311__JW2308	yfaV__b2246__JW2240	-23.9555
yhbN__b3200__JW3167	murD__b0088__JW0086	-23.9547
rybB__b4417__UNKW3110	caiT__b0040__JW0039	-23.9543
rfaK__b3623__JW3598	rplW__b3318__JW3280	-23.9541
slt__b4392__JW4355	ftsA__b0094__JW0092	-23.9526
nlpD__b2742__JW2712	napD__b2207__JW2195	-23.951
kdsC__b3198__JW3165	yfbW__b4544__JW2252	-23.9483
yrbB__b3191__JW5535	nlpE__b0192__JW0188	-23.9379
mtgA__b3208__JW3175	yfbG__b2255__JW2249	-23.9296
yjgP__b4261__JW4218	wzc__b2060__JW2045	-23.9284
ydiO__b1695__JW5275	yjeM__b4156__JW5739	-23.9259
ymgF__b4520__JW1156	yedE__b1929__JW1914	-23.9254
glmS__b3729__JW3707	wbbK__b2032__JW2017	-23.9252
eno__b2779__JW2750	ygeR__b2865__JW2833	-23.9247
mepA__b2328__JW2325	ygbN__b2740__JW2710	-23.9233
gspO__b3335__JW3297	yhjE__b3523__JW3491	-23.9232
yeiW__b4502__JW5361	bglH__b3720__JW3698	-23.9223
zipA__b2412__JW2404	ybeD__b0631__JW0626	-23.9215
ycjG__b1325__JW1318	emrB__b2686__JW2661	-23.9198
ggt__b3447__JW3412	frdA__b4154__JW4115	-20.2082
rfaK__b3623__JW3598	ffh__b2610__JW5414	-20.029
rybB__b4417__UNKW3110	murG__b0090__JW0088	-18.9494
blr__b4409__JW5963	fhuA__b0150__JW0146	-18.9356
rybB__b4417__UNKW3110	yfhM__b2520__JW2504	-18.8663
dicF__b1574__UNKW3110	yhfK__b3358__JW5701	-18.4078
ttk__b3641__JW5641	glmM__b3176__JW3143	-17.6974
emrB__b2686__JW2661	fabH__b1091__JW1077	-17.6379
ispG__b2515__JW2499	wbbK__b2032__JW2017	-16.4135
dicF__b1574__UNKW3110	wzxE__b3792__JW3766	-15.6649
csgG__b1037__JW1020	gspM__b3334__JW5704	-15.5469
blr__b4409__JW5963	ybaT__b0486__JW0475	-15.374
gcvB__b4443__UNKW3110	yedE__b1929__JW1914	-15.2944
gcvB__b4443__UNKW3110	cpsB__b2049__JW2034	-15.2673
amiC__b2817__JW5449	ompA__b0957__JW0940	-15.2575
fhuB__b0153__JW0149	birA__b3973__JW3941	-15.0805
dicF__b1574__UNKW3110	dsbG__b0604__JW0597	-14.9964
blr__b4409__JW5963	glmU__b3730__JW3708	-14.9413
dsbB__b1185__JW5182	acrD__b2470__JW2454	-14.9267
rybB__b4417__UNKW3110	yfcC__b2298__JW2295	-14.8002
yeiW__b4502__JW5361	yidK__b3679__JW3655	-14.7981
yhbN__b3200__JW3167	ispU__b0174__JW0169	-14.7258
glpB__b2242__JW2236	gutQ__b2708__JW5431	-14.7014
mreC__b3250__JW3219	amiC__b2817__JW5449	-14.6358
gcvB__b4443__UNKW3110	ycfL__b1104__JW1090	-14.5553
lamB__b4036__JW3996	mipA__b1782__JW1771	-14.3737
kdtA__b3633__JW3608	yfbG__b2255__JW2249	-14.1057
murF__b0086__JW0084	wcaB__b2058__JW2043	-13.9878
ydiD__b1701__JW5910	yhcD__b3216__JW3183	-13.9132
rfaD__b3619__JW3594	wbbK__b2032__JW2017	-13.7561
rfaC__b3621__JW3596	emrB__b2686__JW2661	-13.7362
ydgA__b1614__JW1606	acpP__b1094__JW1080	-13.6872
fadB__b3846__JW3822	wbbI__b2034__JW2019	-13.4781
yfbG__b2255__JW2249	wbbK__b2032__JW2017	-13.3257
yjaH__b4001__JW3965	pgsA__b1912__JW1897	-13.2762
glmU__b3730__JW3708	emrB__b2686__JW2661	-13.0002
oxyS__b4458__UNKW3110	gmd__b2053__JW2038	-12.972
yajI__b0412__JW5056	lpxD__b0179__JW0174	-12.9719
pta__b2297__JW2294	sohA__b3129__JW3098	-12.9443
ftsH__b3178__JW3145	mreB__b3251__JW3220	-12.9336
folD__b0529__JW0518	era__b2566__JW2550	-12.928
acpP__b1094__JW1080	yfdV__b2372__JW2369	-12.9042
lpxC__b0096__JW0094	fhuD__b0152__JW0148	-12.8928
fabG__b1093__JW1079	murD__b0088__JW0086	-12.8699
cydA__b0733__JW0722	ubiD__b3843__JW3819	-12.8628
kdsA__b1215__JW1206	yfeH__b2410__JW5876	-12.8178
mreD__b3249__JW3218	exbB__b3006__JW2974	-12.7635
emrB__b2686__JW2661	yagX__b0291__JW0285	-12.7534
ftsX__b3462__JW3427	tolR__b0738__JW0728	-12.6334
acpP__b1094__JW1080	ybgQ__b0718__JW5099	-12.6309
btuF__b0158__JW0154	ytfF__b4210__JW4168	-12.6078
yejO__b2190__JW5839	emrB__b2686__JW2661	-12.5903
ggt__b3447__JW3412	yaaU__b0045__JW0044	-12.5877
rfaD__b3619__JW3594	emtA__b1193__JW5821	-12.5844
murF__b0086__JW0084	yehU__b2126__JW5353	-12.5719
mtgA__b3208__JW3175	wcaE__b2055__JW2040	-12.4632
bacA__b3057__JW3029	xerC__b3811__JW3784	-12.4559
zipA__b2412__JW2404	ycaI__b0913__JW5120	-12.4402
kdsA__b1215__JW1206	yddB__b1495__JW1490	-12.4308
paaC__b1390__JW1385	phoE__b0241__JW0231	-12.3929
rfaF__b3620__JW3595	wbbK__b2032__JW2017	-12.3404
yfbE__b2253__JW5372	gspM__b3334__JW5704	-12.3283
mrdB__b0634__JW0629	murD__b0088__JW0086	-12.3161
pbpG__b2134__JW5355	cfa__b1661__JW1653	-12.164
rfaQ__b3632__JW3607	yfbG__b2255__JW2249	-12.1057
micF__b4439__UNKW3110	yjiO__b4337__JW4300	-12.0705
blr__b4409__JW5963	ybjP__b0865__JW0849	-12.0134
fabH__b1091__JW1077	yjcD__b4064__JW4025	-11.9563
fhuB__b0153__JW0149	yehU__b2126__JW5353	-11.9189
murD__b0088__JW0086	mipA__b1782__JW1771	-11.9156
minE__b1174__JW1163	mdtD__b2077__JW2062	-11.8837
rfaG__b3631__JW3606	glmM__b3176__JW3143	-11.8818
mviN__b1069__JW1056	ffh__b2610__JW5414	-11.861
rfaC__b3621__JW3596	yjgK__b4252__JW5756	-11.8606
minE__b1174__JW1163	murF__b0086__JW0084	-11.8114
gcvB__b4443__UNKW3110	btuF__b0158__JW0154	-11.785
yccZ__b0983__JW0966	rfaD__b3619__JW3594	-11.6811
cydB__b0734__JW0723	yagX__b0291__JW0285	-11.6643
wzc__b2060__JW2045	yajG__b0434__JW0424	-11.654
ampG__b0433__JW0423	yihN__b3874__JW3845	-11.6436
ispF__b2746__JW2716	murD__b0088__JW0086	-11.6371
rfaD__b3619__JW3594	ftsZ__b0095__JW0093	-11.6181
tar__b1886__JW1875	tolA__b0739__JW0729	-11.5491
nlpB__b2477__JW2462	mdoC__b1047__JW1034	-11.5167
minE__b1174__JW1163	metK__b2942__JW2909	-11.5029
glpB__b2242__JW2236	rfaL__b3622__JW3597	-11.4978
emrB__b2686__JW2661	hflC__b4175__JW4133	-11.4599
fabR__b3963__JW3935	rfaD__b3619__JW3594	-11.4338
htrL__b3618__JW5644	yrbK__b3199__JW3166	-11.4067
glpK__b3926__JW3897	ugpA__b3452__JW3417	-11.391
wcaB__b2058__JW2043	rfaD__b3619__JW3594	-11.3359
mdtE__b3513__JW3481	ubiF__b0662__JW0659	-11.3095
gcvB__b4443__UNKW3110	wcaI__b2050__JW2035	-11.2943
crcA__b0622__JW0617	lpxC__b0096__JW0094	-11.2913
blr__b4409__JW5963	ubiE__b3833__JW5581	-11.2751
minE__b1174__JW1163	ydeT__b1505__JW1499	-11.2585
rfaD__b3619__JW3594	ydgR__b1634__JW1626	-11.2574
pgsA__b1912__JW1897	yjcD__b4064__JW4025	-11.242
rfaP__b3630__JW3605	yddW__b1491__JW1486	-11.2269
ytfM__b4220__JW4179	pgsA__b1912__JW1897	-11.213
tolQ__b0737__JW0727	yliI__b0837__JW0821	-11.2127
blr__b4409__JW5963	oppC__b1245__JW1237	-11.2036
rfaD__b3619__JW3594	amiC__b2817__JW5449	-11.2031
rfaD__b3619__JW3594	mreD__b3249__JW3218	-11.1725
yeiW__b4502__JW5361	gspM__b3334__JW5704	-11.1497
pgsA__b1912__JW1897	yicO__b3664__JW5636	-11.1271
emrB__b2686__JW2661	yfcU__b2338__JW2335	-11.097
yliI__b0837__JW0821	mdtK__b1663__JW1655	-11.0862
mviN__b1069__JW1056	wcaM__b2043__JW2028	-11.0788
ydgR__b1634__JW1626	pppA__b2972__JW2939	-11.0769
kdtA__b3633__JW3608	lpxK__b0915__JW0898	-11.0693
yjaH__b4001__JW3965	rfaD__b3619__JW3594	-11.0441
oppD__b1246__JW1238	mdtI__b1599__JW1591	-11.0224
emrB__b2686__JW2661	xerC__b3811__JW3784	-11.0197
murC__b0091__JW0089	mltC__b2963__JW5481	-11.0133
minE__b1174__JW1163	yiaT__b3584__JW3556	-10.9758
rfaD__b3619__JW3594	exbB__b3006__JW2974	-10.9723
kdtA__b3633__JW3608	mdtJ__b1600__JW1592	-10.9321
lamB__b4036__JW3996	minD__b1175__JW1164	-10.8995
sapD__b1291__JW1284	yjcR__b4082__JW4043	-10.8656
lolE__b1118__JW1104	pabB__b1812__JW1801	-10.863
sapF__b1290__JW1283	zipA__b2412__JW2404	-10.8422
bcsB__b3532__JW3500	kdsA__b1215__JW1206	-10.7803
omrA__b4444__UNKW3110	glgA__b3429__JW3392	-10.7697
frlB__b3371__JW5700	fepE__b0587__JW0579	-10.7391
ftsH__b3178__JW3145	ybiO__b0808__JW5108	-10.7329
murC__b0091__JW0089	gspG__b3328__JW3290	-10.7121
ycjG__b1325__JW1318	yliI__b0837__JW0821	-10.7096
yfaL__b2233__JW2227	mdtI__b1599__JW1591	-10.6903
purB__b1131__JW1117	ubiD__b3843__JW3819	-10.6779
amiB__b4169__JW4127	envC__b3613__JW5646	-10.674
yggU__b2953__JW5479	phoE__b0241__JW0231	-10.6613
zipA__b2412__JW2404	yaiP__b0363__JW0355	-10.6611
rffT__b4404__JW5596	ispE__b1208__JW1199	-10.6572
yjfM__b4185__JW4143	rfaD__b3619__JW3594	-10.6546
glpK__b3926__JW3897	yeaV__b1801__JW5293	-10.651
folD__b0529__JW0518	ftsH__b3178__JW3145	-10.6295
glgC__b3430__JW3393	galT__b0758__JW0741	-10.582
yeiW__b4502__JW5361	gmhB__b0200__JW0196	-10.565
yeaV__b1801__JW5293	betT__b0314__JW0306	-10.5573
kdtA__b3633__JW3608	murD__b0088__JW0086	-10.5349
rfaD__b3619__JW3594	ypdI__b2376__JW2373	-10.5252
minD__b1175__JW1164	rpmA__b3185__JW3152	-10.522
lolC__b1116__JW5161	yagG__b0270__JW0263	-10.5197
alr__b4053__JW4013	csgG__b1037__JW1020	-10.509
secG__b3175__JW3142	pgsA__b1912__JW1897	-10.4925
tsr__b4355__JW4318	coaD__b3634__JW3609	-10.4771
yjgP__b4261__JW4218	sapA__b1294__JW1287	-10.4721
rfaK__b3623__JW3598	murB__b3972__JW3940	-10.4533
fhuB__b0153__JW0149	glmU__b3730__JW3708	-10.4413
ecnA__b4410__JW5737	rfaD__b3619__JW3594	-10.4387
bacA__b3057__JW3029	fhuD__b0152__JW0148	-10.4153
dicF__b1574__UNKW3110	acrD__b2470__JW2454	-10.4133
btuF__b0158__JW0154	ubiD__b3843__JW3819	-10.3679
rfaD__b3619__JW3594	yfiO__b2595__JW2577	-10.3608
rfaC__b3621__JW3596	slt__b4392__JW4355	-10.3516
ybiO__b0808__JW5108	ydeT__b1505__JW1499	-10.3446
emrB__b2686__JW2661	ftsZ__b0095__JW0093	-10.3325
aaeA__b3241__JW3210	murF__b0086__JW0084	-10.3323
paaC__b1390__JW1385	lpxD__b0179__JW0174	-10.329
pgsA__b1912__JW1897	rpmA__b3185__JW3152	-10.3285
tsr__b4355__JW4318	tolA__b0739__JW0729	-10.3175
rfaD__b3619__JW3594	yfbJ__b2258__JW5373	-10.3141
secD__b0408__JW0398	vacJ__b2346__JW2343	-10.3064
rfaD__b3619__JW3594	lpxC__b0096__JW0094	-10.2869
yihA__b3865__JW5930	ompX__b0814__JW0799	-10.2643
secF__b0409__JW0399	dacD__b2010__JW5329	-10.2483
zipA__b2412__JW2404	paaB__b1389__JW1384	-10.2175
rfaD__b3619__JW3594	mltA__b2813__JW2784	-10.2108
fadA__b3845__JW5578	kdsA__b1215__JW1206	-10.2073
blr__b4409__JW5963	yhfT__b3377__JW3340	-10.1847
rfaD__b3619__JW3594	yfcX__b2341__JW2338	-10.1696
ydiD__b1701__JW5910	yjiO__b4337__JW4300	-10.1489
emrB__b2686__JW2661	secY__b3300__JW3262	-10.1266
rfaD__b3619__JW3594	yfaZ__b2250__JW5371	-10.0858
rfaD__b3619__JW3594	yhbN__b3200__JW3167	-10.0827
bcsB__b3532__JW3500	parE__b3030__JW2998	-10.0785
nanA__b3225__JW3194	emrB__b2686__JW2661	-10.0784
rfaD__b3619__JW3594	ompT__b0565__JW0554	-10.072
accA__b0185__JW0180	ftsK__b0890__JW0873	-10.0566
yjcH__b4068__JW4029	ftsZ__b0095__JW0093	-10.0401
ompW__b1256__JW1248	minD__b1175__JW1164	-10.0357
yohG__b2138__JW5838	ycfN__b1106__JW1092	-10.0216
mrdA__b0635__JW0630	emrB__b2686__JW2661	-9.99743
fliP__b1948__JW1932	rhsD__b0497__JW0486	-9.99641
tsr__b4355__JW4318	ycfP__b1108__JW5158	-9.98488
rfaD__b3619__JW3594	caiT__b0040__JW0039	-9.98339
minD__b1175__JW1164	yqhH__b3014__JW2982	-9.97802
tsr__b4355__JW4318	mdtI__b1599__JW1591	-9.97729
gcvB__b4443__UNKW3110	acrB__b0462__JW0451	-9.97648
htrL__b3618__JW5644	hsrA__b3754__JW3733	-9.97338
zipA__b2412__JW2404	kdsA__b1215__JW1206	-9.95916
dicF__b1574__UNKW3110	mscL__b3291__JW3252	-9.93545
yhcB__b3233__JW5539	slp__b3506__JW3474	-9.93512
rfaD__b3619__JW3594	wzxC__b2046__JW2031	-9.91213
rfaD__b3619__JW3594	rfbX__b2037__JW2022	-9.91119
tatB__b3838__JW5580	yggU__b2953__JW5479	-9.90785
micA__b4442__UNKW3110	acrA__b0463__JW0452	-9.90589
ompF__b0929__JW0912	pgpA__b0418__JW0408	-9.90429
pgsA__b1912__JW1897	yjbF__b4027__JW5711	-9.89653
kdtA__b3633__JW3608	pabC__b1096__JW1082	-9.86883
lspA__b0027__JW0025	rfaD__b3619__JW3594	-9.86637
acpP__b1094__JW1080	xerC__b3811__JW3784	-9.8568
yfbW__b4544__JW2252	rfaD__b3619__JW3594	-9.85131
eno__b2779__JW2750	hemY__b3802__JW3774	-9.84995
rfaK__b3623__JW3598	murC__b0091__JW0089	-9.83137
yihA__b3865__JW5930	rfaD__b3619__JW3594	-9.81852
lolA__b0891__JW0874	murD__b0088__JW0086	-9.81289
nlpB__b2477__JW2462	mdlB__b0449__JW5061	-9.80628
fabI__b1288__JW1281	betT__b0314__JW0306	-9.79706
ybeD__b0631__JW0626	emrB__b2686__JW2661	-9.78389
micC__b4427__UNKW3110	mdtK__b1663__JW1655	-9.78149
ddlA__b0381__JW0372	spoT__b3650__JW3625	-9.78055
pgsA__b1912__JW1897	ycfN__b1106__JW1092	-9.77982
micA__b4442__UNKW3110	yibH__b3597__JW3571	-9.769
dxr__b0173__JW0168	murD__b0088__JW0086	-9.76412
galU__b1236__JW1224	emrB__b2686__JW2661	-9.75922
rfaD__b3619__JW3594	rfbD__b2040__JW2025	-9.74678
murA__b3189__JW3156	yafL__b0227__JW0217	-9.7372
lpxA__b0181__JW0176	yagG__b0270__JW0263	-9.73096
murB__b3972__JW3940	xerC__b3811__JW3784	-9.72662
bcsB__b3532__JW3500	pbpC__b2519__JW2503	-9.7265
lolD__b1117__JW5162	secD__b0408__JW0398	-9.70012
rfaD__b3619__JW3594	ampD__b0110__JW0106	-9.67866
cpsG__b2048__JW2033	emrB__b2686__JW2661	-9.66096
wcaL__b2044__JW2029	rfaD__b3619__JW3594	-9.65981
wcaL__b2044__JW2029	ydiD__b1701__JW5910	-9.6502
emrB__b2686__JW2661	yeiR__b2173__JW2161	-9.64503
rfaD__b3619__JW3594	fabB__b2323__JW2320	-9.61752
rfaD__b3619__JW3594	dxs__b0420__JW0410	-9.61586
gspH__b3329__JW3291	wbbI__b2034__JW2019	-9.60712
era__b2566__JW2550	yjeP__b4159__JW4120	-9.58876
mviN__b1069__JW1056	yhcD__b3216__JW3183	-9.58755
blr__b4409__JW5963	rfaD__b3619__JW3594	-9.58584
rfaD__b3619__JW3594	ftsY__b3464__JW3429	-9.58311
mreC__b3250__JW3219	murD__b0088__JW0086	-9.56001
rfaD__b3619__JW3594	plsC__b3018__JW2986	-9.55851
fepA__b0584__JW5086	ydfJ__b1543__JW1536	-9.54722
pta__b2297__JW2294	yhcB__b3233__JW5539	-9.54485
tsr__b4355__JW4318	lepA__b2569__JW2553	-9.53346
rfaD__b3619__JW3594	avtA__b3572__JW5652	-9.53242
glpB__b2242__JW2236	sapD__b1291__JW1284	-9.51042
rfaD__b3619__JW3594	ydiO__b1695__JW5275	-9.50856
glgC__b3430__JW3393	ttk__b3641__JW5641	-9.50828
micA__b4442__UNKW3110	mltC__b2963__JW5481	-9.49016
lnt__b0657__JW0654	minD__b1175__JW1164	-9.48926
yjjA__b4360__JW5795	pgsA__b1912__JW1897	-9.48305
fabZ__b0180__JW0175	rfaD__b3619__JW3594	-9.48257
rfaD__b3619__JW3594	yaiO__b0358__JW0349	-9.43292
rfaD__b3619__JW3594	glf__b2036__JW2021	-9.41741
acpS__b2563__JW2547	ydhO__b1655__JW5270	-9.40088
wcaI__b2050__JW2035	rfaD__b3619__JW3594	-9.39235
pgsA__b1912__JW1897	cusF__b0573__JW0562	-9.39026
rfaD__b3619__JW3594	cheY__b1882__JW1871	-9.38778
ddpA__b1487__JW5240	pgsA__b1912__JW1897	-9.38206
rfaD__b3619__JW3594	rfbC__b2038__JW2023	-9.37789
hflX__b4173__JW4131	kdsA__b1215__JW1206	-9.36017
rfaD__b3619__JW3594	cld__b2027__JW5836	-9.35077
ubiB__b3835__JW3812	ycaD__b0898__JW0881	-9.34152
entF__b0586__JW0578	ubiB__b3835__JW3812	-9.33881
mtgA__b3208__JW3175	rfaD__b3619__JW3594	-9.32774
ybiV__b0822__JW0806	murF__b0086__JW0084	-9.31965
rfaD__b3619__JW3594	maoC__b1387__JW1382	-9.31694
ftsX__b3462__JW3427	yagG__b0270__JW0263	-9.3118
rfaD__b3619__JW3594	ompW__b1256__JW1248	-9.30887
motB__b1889__JW1878	ffh__b2610__JW5414	-9.30195
rfaD__b3619__JW3594	secD__b0408__JW0398	-9.29622
mrcA__b3396__JW3359	cusA__b0575__JW0564	-9.26367
rfaD__b3619__JW3594	yggU__b2953__JW5479	-9.25913
rfaC__b3621__JW3596	zipA__b2412__JW2404	-9.25862
acpP__b1094__JW1080	entA__b0596__JW0588	-9.24709
murD__b0088__JW0086	ispH__b0029__JW0027	-9.23388
rfaD__b3619__JW3594	rlpA__b0633__JW0628	-9.23311
mreD__b3249__JW3218	ynbB__b1409__JW1406	-9.22822
folD__b0529__JW0518	ispE__b1208__JW1199	-9.21205
secD__b0408__JW0398	panC__b0133__JW0129	-9.20794
acpP__b1094__JW1080	yiaT__b3584__JW3556	-9.19496
yidC__b3705__JW3683	rfaD__b3619__JW3594	-9.19475
kdsC__b3198__JW3165	agaS__b3136__JW3105	-9.1912
secM__b0097__JW5007	pbpC__b2519__JW2503	-9.19042
rfaD__b3619__JW3594	ybcH__b0567__JW0556	-9.18517
gspG__b3328__JW3290	acpP__b1094__JW1080	-9.17716
folD__b0529__JW0518	metK__b2942__JW2909	-9.1762
ftsX__b3462__JW3427	cheW__b1887__JW1876	-9.17182
birA__b3973__JW3941	rfaD__b3619__JW3594	-9.16552
zipA__b2412__JW2404	yiiD__b3888__JW3859	-9.14482
rfaD__b3619__JW3594	ispE__b1208__JW1199	-9.14232
yjiY__b4354__JW5791	tolQ__b0737__JW0727	-9.14158
ffh__b2610__JW5414	fabG__b1093__JW1079	-9.11708
pgsA__b1912__JW1897	yijE__b3943__JW5557	-9.07239
bcsB__b3532__JW3500	alr__b4053__JW4013	-9.07028
yfaL__b2233__JW2227	rpmA__b3185__JW3152	-9.05442
ftsX__b3462__JW3427	ybgC__b0736__JW0726	-9.05433
murB__b3972__JW3940	rfaD__b3619__JW3594	-9.04852
tar__b1886__JW1875	yfdH__b2351__JW2347	-9.03962
emrB__b2686__JW2661	lpp__b1677__JW1667	-9.03598
bcsB__b3532__JW3500	yjeP__b4159__JW4120	-8.99454
rfaD__b3619__JW3594	ispH__b0029__JW0027	-8.95945
acrF__b3266__JW3234	murD__b0088__JW0086	-8.94956
osmC__b1482__JW1477	emrD__b3673__JW5634	-8.93916
glmS__b3729__JW3707	tpx__b1324__JW1317	-8.92863
emrB__b2686__JW2661	rffA__b3791__JW3765	-8.91594
rfaD__b3619__JW3594	lpxH__b0524__JW0513	-8.88962
yajC__b0407__JW0397	xerC__b3811__JW3784	-8.88714
zipA__b2412__JW2404	emrK__b2368__JW2365	-8.88211
zipA__b2412__JW2404	ydiM__b1690__JW1680	-8.88125
ygeD__b2835__JW2803	yfcJ__b2322__JW2319	-8.87616
lamB__b4036__JW3996	mukB__b0924__JW0907	-8.86148
mdtE__b3513__JW3481	murD__b0088__JW0086	-8.85743
mpl__b4233__JW4192	minD__b1175__JW1164	-8.8509
rffH__b3789__JW3763	rfaD__b3619__JW3594	-8.84413
ttk__b3641__JW5641	betT__b0314__JW0306	-8.82877
glmU__b3730__JW3708	secD__b0408__JW0398	-8.82674
rffA__b3791__JW3765	csgG__b1037__JW1020	-8.82633
ffh__b2610__JW5414	crcA__b0622__JW0617	-8.82387
gspH__b3329__JW3291	yeeO__b1985__JW1965	-8.81754
aidB__b4187__JW5867	rfaD__b3619__JW3594	-8.80479
rfaD__b3619__JW3594	phoE__b0241__JW0231	-8.78586
btuB__b3966__JW3938	ddg__b2378__JW2375	-8.77941
mltA__b2813__JW2784	appC__b0978__JW0960	-8.76287
mdoB__b4359__JW5794	rfaD__b3619__JW3594	-8.75968
exbD__b3005__JW2973	yfiB__b2605__JW2586	-8.7529
rfaE__b3052__JW3024	ybgP__b0717__JW0707	-8.71524
ftsH__b3178__JW3145	fadE__b0221__JW5020	-8.71051
glgC__b3430__JW3393	dppA__b3544__JW3513	-8.70126
pgsA__b1912__JW1897	nfrA__b0568__JW0557	-8.69802
bcsB__b3532__JW3500	htrL__b3618__JW5644	-8.68741
btuF__b0158__JW0154	ftsH__b3178__JW3145	-8.6824
lnt__b0657__JW0654	rfaD__b3619__JW3594	-8.65715
emrB__b2686__JW2661	pgpA__b0418__JW0408	-8.65125
glmU__b3730__JW3708	hflK__b4174__JW4132	-8.65095
arcB__b3210__JW5536	lpxC__b0096__JW0094	-8.65041
oppA__b1243__JW1235	mdtK__b1663__JW1655	-8.61985
glpF__b3927__JW3898	yaeF__b0193__JW5016	-8.59747
btuB__b3966__JW3938	murF__b0086__JW0084	-8.59409
rfaD__b3619__JW3594	yliI__b0837__JW0821	-8.57539
rfaD__b3619__JW3594	yebA__b1856__JW5304	-8.57521
rfaD__b3619__JW3594	nlpB__b2477__JW2462	-8.55405
minD__b1175__JW1164	agaS__b3136__JW3105	-8.54786
mltB__b2701__JW2671	frdA__b4154__JW4115	-8.54659
yeiW__b4502__JW5361	rfaD__b3619__JW3594	-8.54352
ecnB__b4411__JW4108	rfaD__b3619__JW3594	-8.53006
gmd__b2053__JW2038	rfaD__b3619__JW3594	-8.51912
glpK__b3926__JW3897	kefA__b0465__JW0454	-8.51788
rfaD__b3619__JW3594	ycfL__b1104__JW1090	-8.49988
emrB__b2686__JW2661	ubiF__b0662__JW0659	-8.49542
rfaD__b3619__JW3594	pbpG__b2134__JW5355	-8.49492
rfaD__b3619__JW3594	dacD__b2010__JW5329	-8.48876
emrB__b2686__JW2661	yhjE__b3523__JW3491	-8.48648
wzyE__b3793__JW3769	ybbY__b0513__JW0501	-8.46267
secE__b3981__JW3944	rfaD__b3619__JW3594	-8.44251
glmU__b3730__JW3708	rfaD__b3619__JW3594	-8.43063
ispB__b3187__JW3154	rfaD__b3619__JW3594	-8.4299
yjgK__b4252__JW5756	yagX__b0291__JW0285	-8.42717
kdtA__b3633__JW3608	torD__b0998__JW0983	-8.41643
yhcB__b3233__JW5539	yfiO__b2595__JW2577	-8.41591
rfaD__b3619__JW3594	lolC__b1116__JW5161	-8.40097
rfaD__b3619__JW3594	csrA__b2696__JW2666	-8.38538
yiaF__b3554__JW5655	yicJ__b3657__JW5939	-8.38342
glmU__b3730__JW3708	ftsX__b3462__JW3427	-8.37428
rfaD__b3619__JW3594	ygeD__b2835__JW2803	-8.36532
fabG__b1093__JW1079	lpxA__b0181__JW0176	-8.35721
rfaD__b3619__JW3594	yfbF__b2254__JW2248	-8.35617
wzxE__b3792__JW3766	rfaD__b3619__JW3594	-8.32616
rfaD__b3619__JW3594	ycdQ__b1022__JW1007	-8.31281
minD__b1175__JW1164	ydfJ__b1543__JW1536	-8.30303
glpK__b3926__JW3897	tonB__b1252__JW5195	-8.29641
secY__b3300__JW3262	murD__b0088__JW0086	-8.29517
mreD__b3249__JW3218	appC__b0978__JW0960	-8.28684
mppA__b1329__JW1322	tar__b1886__JW1875	-8.27574
psd__b4160__JW4121	rfaD__b3619__JW3594	-8.27381
rfaD__b3619__JW3594	pgsA__b1912__JW1897	-8.22955
fliR__b1950__JW1934	galK__b0757__JW0740	-8.22631
wzyE__b3793__JW3769	mdtK__b1663__JW1655	-8.22216
ftsY__b3464__JW3429	yceB__b1063__JW1050	-8.2174
wcaC__b2057__JW2042	csgF__b1038__JW1021	-8.21593
yliI__b0837__JW0821	paaH__b1395__JW1390	-8.21526
ampG__b0433__JW0423	rfaD__b3619__JW3594	-8.21494
cydA__b0733__JW0722	parE__b3030__JW2998	-8.2116
kdtA__b3633__JW3608	cls__b1249__JW1241	-8.19915
pgsA__b1912__JW1897	yfdH__b2351__JW2347	-8.19751
plsC__b3018__JW2986	ispF__b2746__JW2716	-8.16486
yfaZ__b2250__JW5371	acpP__b1094__JW1080	-8.15745
yfcX__b2341__JW2338	secD__b0408__JW0398	-8.14708
mltB__b2701__JW2671	secD__b0408__JW0398	-8.14406
emrB__b2686__JW2661	paaG__b1394__JW1389	-8.13943
cyoB__b0431__JW0421	rffD__b3787__JW5599	-8.10124
secE__b3981__JW3944	rfaZ__b3624__JW3599	-8.09151
accB__b3255__JW3223	wcaA__b2059__JW2044	-8.07706
glmU__b3730__JW3708	galU__b1236__JW1224	-8.04654
exbB__b3006__JW2974	ybbY__b0513__JW0501	-8.02142
glmS__b3729__JW3707	fhuE__b1102__JW1088	-8.00686
ydgR__b1634__JW1626	mdlB__b0449__JW5061	-7.96298
mviN__b1069__JW1056	rfaD__b3619__JW3594	-7.96287
pgsA__b1912__JW1897	ycfM__b1105__JW5157	-7.92989
rffM__b3794__JW3770	htrL__b3618__JW5644	-7.92725
rfaD__b3619__JW3594	yhjR__b3535__JW3503	-7.91815
rfaD__b3619__JW3594	nlpC__b1708__JW1698	-7.91054
ffh__b2610__JW5414	sugE__b4148__JW5738	-7.90515
micF__b4439__UNKW3110	hlpA__b0178__JW0173	-7.88802
rfaD__b3619__JW3594	fabA__b0954__JW0937	-7.84304
fabH__b1091__JW1077	yehB__b2109__JW2096	-7.82697
yhcB__b3233__JW5539	vacJ__b2346__JW2343	-7.82584
ybcH__b0567__JW0556	yjcD__b4064__JW4025	-7.82516
yfiB__b2605__JW2586	ybbC__b0498__JW0487	-7.791
yhcB__b3233__JW5539	asmA__b2064__JW2049	-7.75346
tar__b1886__JW1875	mrcB__b0149__JW0145	-7.74327
glpK__b3926__JW3897	yhfK__b3358__JW5701	-7.74271
accB__b3255__JW3223	cpsG__b2048__JW2033	-7.73955
murC__b0091__JW0089	dxs__b0420__JW0410	-7.72307
mrdA__b0635__JW0630	folE__b2153__JW2140	-7.69407
yhcB__b3233__JW5539	mukB__b0924__JW0907	-7.67983
lolB__b1209__JW1200	acpP__b1094__JW1080	-7.67527
yehT__b2125__JW5352	ugpC__b3450__JW3415	-7.66546
glpK__b3926__JW3897	xerC__b3811__JW3784	-7.62352
ugd__b2028__JW2010	rfaD__b3619__JW3594	-7.60836
mrcA__b3396__JW3359	motA__b1890__JW1879	-7.60405
rfaD__b3619__JW3594	yehU__b2126__JW5353	-7.60053
metK__b2942__JW2909	murD__b0088__JW0086	-7.59153
entB__b0595__JW0587	lspA__b0027__JW0025	-7.58475
ftsX__b3462__JW3427	motA__b1890__JW1879	-7.56967
yrbB__b3191__JW5535	rfbA__b2039__JW2024	-7.55954
omrA__b4444__UNKW3110	zapA__b2910__JW2878	-7.55379
folE__b2153__JW2140	acpP__b1094__JW1080	-7.5531
wbbK__b2032__JW2017	ispU__b0174__JW0169	-7.42111
tatE__b0627__JW0622	parE__b3030__JW2998	-7.41065
rfaD__b3619__JW3594	ynaI__b1330__JW1323	-7.38602
rfaD__b3619__JW3594	mppA__b1329__JW1322	-7.35985
ybiV__b0822__JW0806	zipA__b2412__JW2404	-7.35771
yehT__b2125__JW5352	sohA__b3129__JW3098	-7.32543
emrB__b2686__JW2661	ispG__b2515__JW2499	-7.32152
wzyE__b3793__JW3769	rssA__b1234__JW1222	-7.29534
era__b2566__JW2550	ompL__b3875__JW3846	-7.28315
ydgR__b1634__JW1626	yidE__b3685__JW3662	-7.26238
ydgR__b1634__JW1626	yhhS__b3473__JW5945	-7.22326
murD__b0088__JW0086	parE__b3030__JW2998	-7.17121
entD__b0583__JW5085	lpxK__b0915__JW0898	7.2176
rfaZ__b3624__JW3599	slp__b3506__JW3474	7.3695
cyoC__b0430__JW0420	tolA__b0739__JW0729	7.43275
trxA__b3781__JW5856	rfaF__b3620__JW3595	7.44693
exbB__b3006__JW2974	yqiG__b3046__JW5507	7.51056
acrB__b0462__JW0451	ybbY__b0513__JW0501	7.51568
fliR__b1950__JW1934	mreC__b3250__JW3219	7.57134
yfiO__b2595__JW2577	ompT__b0565__JW0554	7.58861
emrA__b2685__JW2660	dadX__b1190__JW1179	7.60702
mltA__b2813__JW2784	yqeG__b2845__JW2813	7.61296
nanK__b3222__JW5538	rfbB__b2041__JW2026	7.67402
fliR__b1950__JW1934	accC__b3256__JW3224	7.69707
ggt__b3447__JW3412	yjiJ__b4332__JW4295	7.71932
emrA__b2685__JW2660	tatE__b0627__JW0622	7.72289
micF__b4439__UNKW3110	yfcX__b2341__JW2338	7.74546
htrL__b3618__JW5644	paaD__b1391__JW5217	7.74722
acrB__b0462__JW0451	maoC__b1387__JW1382	7.79606
yjgP__b4261__JW4218	panC__b0133__JW0129	7.81668
kdsA__b1215__JW1206	ylbH__b0499__JW0488	7.82476
rfaE__b3052__JW3024	ttk__b3641__JW5641	7.88614
tatE__b0627__JW0622	yaeF__b0193__JW5016	7.89666
mrdB__b0634__JW0629	zapA__b2910__JW2878	7.93291
ybiV__b0822__JW0806	wbbK__b2032__JW2017	7.99734
dicF__b1574__UNKW3110	tolA__b0739__JW0729	8.03993
bcsB__b3532__JW3500	mscL__b3291__JW3252	8.04481
rfaE__b3052__JW3024	ybiV__b0822__JW0806	8.07784
lamB__b4036__JW3996	tolR__b0738__JW0728	8.12688
gcvB__b4443__UNKW3110	metK__b2942__JW2909	8.15851
era__b2566__JW2550	ddpD__b1484__JW1479	8.17223
nlpB__b2477__JW2462	yhaO__b3110__JW5519	8.37362
yaeL__b0176__JW0171	rffH__b3789__JW3763	8.3748
tatE__b0627__JW0622	ddpD__b1484__JW1479	8.39926
ybiV__b0822__JW0806	fabG__b1093__JW1079	8.40981
ynaI__b1330__JW1323	minD__b1175__JW1164	8.42297
rpoS__b2741__JW5437	btuC__b1711__JW1701	8.42521
pbpG__b2134__JW5355	yjhF__b4296__JW4258	8.54785
ddpD__b1484__JW1479	frdC__b4152__JW4113	8.56055
yeiR__b2173__JW2161	ydiN__b1691__JW5274	8.56327
micC__b4427__UNKW3110	ybjJ__b0845__JW0829	8.61556
ygeD__b2835__JW2803	ppiD__b0441__JW0431	8.63608
yliI__b0837__JW0821	htrE__b0139__JW0135	8.65776
micF__b4439__UNKW3110	lpxC__b0096__JW0094	8.67063
fabF__b1095__JW1081	yhjY__b3548__JW5659	8.6764
accB__b3255__JW3223	yaaU__b0045__JW0044	8.71817
folE__b2153__JW2140	yfdH__b2351__JW2347	8.77177
mscS__b2924__JW2891	ygfU__b2888__JW5470	8.78153
yfbF__b2254__JW2248	ydcO__b1433__JW5229	8.80714
glpK__b3926__JW3897	aaeB__b3240__JW3209	8.87702
osmC__b1482__JW1477	cheB__b1883__JW1872	8.90276
glgC__b3430__JW3393	ybjG__b0841__JW5112	8.92039
dadX__b1190__JW1179	paaE__b1392__JW1387	8.9273
wcaC__b2057__JW2042	ldcA__b1192__JW1181	8.94412
tatE__b0627__JW0622	wcaE__b2055__JW2040	8.982
tatE__b0627__JW0622	vacJ__b2346__JW2343	8.99644
yfiO__b2595__JW2577	yajG__b0434__JW0424	9.02521
lolC__b1116__JW5161	yncD__b1451__JW1446	9.03249
rybB__b4417__UNKW3110	lolB__b1209__JW1200	9.09342
ygeD__b2835__JW2803	yjhA__b4311__JW5778	9.11881
mpaA__b1326__JW1319	ompX__b0814__JW0799	9.14574
yafL__b0227__JW0217	yjhA__b4311__JW5778	9.1528
pta__b2297__JW2294	folM__b1606__JW1598	9.22909
prc__b1830__JW1819	mltD__b0211__JW5018	9.24177
minE__b1174__JW1163	ybgP__b0717__JW0707	9.24737
ggt__b3447__JW3412	yhiP__b3496__JW3463	9.27946
lamB__b4036__JW3996	yceB__b1063__JW1050	9.29769
tatE__b0627__JW0622	torD__b0998__JW0983	9.30374
murD__b0088__JW0086	yihN__b3874__JW3845	9.37575
ybbC__b0498__JW0487	ydfJ__b1543__JW1536	9.39197
kdtA__b3633__JW3608	cpsB__b2049__JW2034	9.43609
ddpA__b1487__JW5240	ggt__b3447__JW3412	9.50887
osmC__b1482__JW1477	kdsB__b0918__JW0901	9.51719
yfiO__b2595__JW2577	ycgV__b1202__JW1193	9.52363
cyoD__b0429__JW0419	acpP__b1094__JW1080	9.52803
ycaR__b0917__JW0900	yhiI__b3487__JW3454	9.53847
fliR__b1950__JW1934	ispD__b2747__JW2717	9.56854
secY__b3300__JW3262	tolR__b0738__JW0728	9.59678
murD__b0088__JW0086	yhaO__b3110__JW5519	9.72507
yceG__b1097__JW1083	yhfT__b3377__JW3340	9.74602
ynbB__b1409__JW1406	hsrA__b3754__JW3733	9.77903
kdtA__b3633__JW3608	hflC__b4175__JW4133	9.79764
gspJ__b3331__JW3293	yceG__b1097__JW1083	9.83665
ydgR__b1634__JW1626	ynfM__b1596__JW1588	9.84841
ybiV__b0822__JW0806	appC__b0978__JW0960	9.93054
yfbE__b2253__JW5372	paaE__b1392__JW1387	9.95096
mviN__b1069__JW1056	ycgR__b1194__JW1183	9.97279
yraP__b3150__JW3119	ycdQ__b1022__JW1007	10.0247
mdtE__b3513__JW3481	cusB__b0574__JW0563	10.0473
mdtC__b2076__JW2061	glgC__b3430__JW3393	10.0719
yidB__b3698__JW3675	rpmA__b3185__JW3152	10.1717
accB__b3255__JW3223	yfaW__b2247__JW2241	10.1832
yfgA__b2516__JW2500	yeeF__b2014__JW5330	10.2207
yhhH__b3483__JW3449	gutQ__b2708__JW5431	10.2264
yfiO__b2595__JW2577	torT__b0994__JW0979	10.2369
ggt__b3447__JW3412	mrcB__b0149__JW0145	10.246
tatE__b0627__JW0622	yddW__b1491__JW1486	10.2542
rfaQ__b3632__JW3607	zapA__b2910__JW2878	10.2608
yfaZ__b2250__JW5371	yjhF__b4296__JW4258	10.261
lamB__b4036__JW3996	yibH__b3597__JW3571	10.2733
wcaI__b2050__JW2035	mpaA__b1326__JW1319	10.3695
crcA__b0622__JW0617	emrK__b2368__JW2365	10.4356
ispE__b1208__JW1199	acpP__b1094__JW1080	10.4599
ispG__b2515__JW2499	mepA__b2328__JW2325	10.4809
exbB__b3006__JW2974	yncD__b1451__JW1446	10.5075
btuB__b3966__JW3938	sfmD__b0532__JW0521	10.6648
wcaC__b2057__JW2042	paaE__b1392__JW1387	10.6956
glmU__b3730__JW3708	folC__b2315__JW2312	10.7389
rfaF__b3620__JW3595	tsx__b0411__JW0401	10.7764
dicF__b1574__UNKW3110	csgF__b1038__JW1021	10.7834
ggt__b3447__JW3412	hflC__b4175__JW4133	10.7907
blr__b4409__JW5963	ygbN__b2740__JW2710	10.8219
ybbC__b0498__JW0487	glpT__b2240__JW2234	10.8979
fliP__b1948__JW1932	cheZ__b1881__JW1870	10.9283
accB__b3255__JW3223	yncD__b1451__JW1446	10.962
ybeX__b0658__JW0655	yjhB__b4279__JW5768	11.003
folE__b2153__JW2140	yfdV__b2372__JW2369	11.047
tatE__b0627__JW0622	yhaO__b3110__JW5519	11.0676
fliP__b1948__JW1932	secY__b3300__JW3262	11.1025
accB__b3255__JW3223	spy__b1743__JW1732	11.1069
ycjG__b1325__JW1318	yjhF__b4296__JW4258	11.1236
lamB__b4036__JW3996	mtr__b3161__JW3130	11.1295
cld__b2027__JW5836	dppA__b3544__JW3513	11.1372
fliR__b1950__JW1934	lpxD__b0179__JW0174	11.1803
secY__b3300__JW3262	csrA__b2696__JW2666	11.1815
accB__b3255__JW3223	gspE__b3326__JW3288	11.2372
lamB__b4036__JW3996	acpT__b3475__JW3440	11.254
yhhH__b3483__JW3449	nlpD__b2742__JW2712	11.2965
glpF__b3927__JW3898	zipA__b2412__JW2404	11.3335
ycbS__b0940__JW0923	birA__b3973__JW3941	11.3416
fliP__b1948__JW1932	wcaF__b2054__JW2039	11.3673
exbB__b3006__JW2974	oppF__b1247__JW1239	11.438
yehT__b2125__JW5352	ydhP__b1657__JW1649	11.4533
gcvB__b4443__UNKW3110	rfbX__b2037__JW2022	11.4703
ybbC__b0498__JW0487	yicJ__b3657__JW5939	11.4971
glpK__b3926__JW3897	rfaB__b3628__JW3603	11.4986
blr__b4409__JW5963	dsbA__b3860__JW3832	11.5472
micC__b4427__UNKW3110	ydiN__b1691__JW5274	11.6605
glmU__b3730__JW3708	ybgC__b0736__JW0726	11.6854
exbD__b3005__JW2973	oppB__b1244__JW1236	11.7608
yeiR__b2173__JW2161	ydeE__b1534__JW1527	11.8147
minD__b1175__JW1164	yfdI__b2352__JW5382	11.8638
yehT__b2125__JW5352	cfa__b1661__JW1653	11.8965
yiaV__b3586__JW3558	ldcA__b1192__JW1181	11.9866
kdtA__b3633__JW3608	yraJ__b3144__JW3113	12.0434
rfaP__b3630__JW3605	yhbT__b3157__JW3126	12.1598
yfcX__b2341__JW2338	yjeP__b4159__JW4120	12.1769
acrD__b2470__JW2454	ispG__b2515__JW2499	12.1883
yeiR__b2173__JW2161	yagG__b0270__JW0263	12.2383
ymgF__b4520__JW1156	entC__b0593__JW0585	12.2405
glpK__b3926__JW3897	ftsL__b0083__JW0081	12.2686
rfaZ__b3624__JW3599	cld__b2027__JW5836	12.3058
rfaQ__b3632__JW3607	rpmA__b3185__JW3152	12.3884
ddlB__b0092__JW0090	wcaA__b2059__JW2044	12.4669
tar__b1886__JW1875	ydeA__b1528__JW1521	12.5568
ynbB__b1409__JW1406	cheW__b1887__JW1876	12.639
accB__b3255__JW3223	pal__b0741__JW0731	12.6577
kdtA__b3633__JW3608	yhjV__b3539__JW3508	12.6759
ompW__b1256__JW1248	kdsB__b0918__JW0901	12.7163
crcA__b0622__JW0617	ybbW__b0511__JW0499	12.7276
yfgA__b2516__JW2500	oppD__b1246__JW1238	12.7469
yehT__b2125__JW5352	sulA__b0958__JW0941	12.83
yajC__b0407__JW0397	degP__b0161__JW0157	12.9257
micF__b4439__UNKW3110	rmf__b0953__JW0936	12.9791
yfiO__b2595__JW2577	arnT__b2257__JW2251	13.0362
acrD__b2470__JW2454	emrY__b2367__JW2364	13.0371
folA__b0048__JW0047	ycfN__b1106__JW1092	13.0572
ggt__b3447__JW3412	ybbY__b0513__JW0501	13.0738
micA__b4442__UNKW3110	mdtI__b1599__JW1591	13.1157
ygiH__b3059__JW3031	pabC__b1096__JW1082	13.2332
caiC__b0037__JW0036	yhaO__b3110__JW5519	13.2847
ubiX__b2311__JW2308	yfdH__b2351__JW2347	13.3117
frdC__b4152__JW4113	yojI__b2211__JW2199	13.5153
ybeX__b0658__JW0655	mdtJ__b1600__JW1592	13.5401
glpK__b3926__JW3897	hflK__b4174__JW4132	13.5709
ybiV__b0822__JW0806	cyoD__b0429__JW0419	13.6222
ggt__b3447__JW3412	pbpG__b2134__JW5355	13.6331
btuB__b3966__JW3938	pgpA__b0418__JW0408	13.6706
tolR__b0738__JW0728	phoE__b0241__JW0231	13.674
glpK__b3926__JW3897	ybgC__b0736__JW0726	13.6805
htrL__b3618__JW5644	slp__b3506__JW3474	13.7625
accB__b3255__JW3223	mscS__b2924__JW2891	13.8815
mviN__b1069__JW1056	ygeD__b2835__JW2803	13.9106
mpaA__b1326__JW1319	kdsA__b1215__JW1206	14.0296
btuB__b3966__JW3938	yfgL__b2512__JW2496	14.0675
yccC__b0981__JW0964	acrD__b2470__JW2454	14.2227
avtA__b3572__JW5652	frdC__b4152__JW4113	14.3034
accB__b3255__JW3223	murD__b0088__JW0086	14.3065
micF__b4439__UNKW3110	ddg__b2378__JW2375	14.31
wzyE__b3793__JW3769	yajG__b0434__JW0424	14.3861
yfcX__b2341__JW2338	yagG__b0270__JW0263	14.4509
ybeX__b0658__JW0655	cyoA__b0432__JW0422	14.5481
tar__b1886__JW1875	spoT__b3650__JW3625	14.7373
glpK__b3926__JW3897	fabG__b1093__JW1079	14.7456
ybeX__b0658__JW0655	macA__b0878__JW0862	14.7506
kdtA__b3633__JW3608	yfcJ__b2322__JW2319	14.7732
btuB__b3966__JW3938	yaiO__b0358__JW0349	15.1175
dicF__b1574__UNKW3110	csgE__b1039__JW1022	15.1205
fabH__b1091__JW1077	wbbH__b2035__JW2020	15.1825
cyoD__b0429__JW0419	yjeP__b4159__JW4120	15.2272
dicF__b1574__UNKW3110	wcaK__b2045__JW2030	15.408
oppD__b1246__JW1238	ydeE__b1534__JW1527	15.5907
yjaH__b4001__JW3965	btuB__b3966__JW3938	15.6597
glpB__b2242__JW2236	ygeD__b2835__JW2803	15.6677
gcvB__b4443__UNKW3110	mraY__b0087__JW0085	15.9367
oppB__b1244__JW1236	yjiY__b4354__JW5791	16.0639
ydiO__b1695__JW5275	ybbW__b0511__JW0499	16.1619
lolC__b1116__JW5161	ubiC__b4039__JW5713	16.4149
accB__b3255__JW3223	yeiH__b2158__JW2145	16.6868
oppD__b1246__JW1238	ybjJ__b0845__JW0829	16.735
arcB__b3210__JW5536	minC__b1176__JW1165	16.8173
yfgA__b2516__JW2500	oppF__b1247__JW1239	16.852
yiiU__b3928__JW3899	yaaU__b0045__JW0044	16.8981
aaeB__b3240__JW3209	cusA__b0575__JW0564	16.9541
yeiW__b4502__JW5361	panE__b0425__JW0415	16.9704
kdsC__b3198__JW3165	envC__b3613__JW5646	17.0569
fliP__b1948__JW1932	smpA__b2617__JW2598	17.198
acrD__b2470__JW2454	dacC__b0839__JW0823	17.3983
glpK__b3926__JW3897	ycfM__b1105__JW5157	17.4081
exbB__b3006__JW2974	ydeT__b1505__JW1499	17.6138
ymgF__b4520__JW1156	yeaN__b1791__JW1780	17.8147
yhhH__b3483__JW3449	slyB__b1641__JW1633	17.8176
htrL__b3618__JW5644	dsbG__b0604__JW0597	17.8675
accB__b3255__JW3223	paaJ__b1397__JW1392	18.0208
exbD__b3005__JW2973	rffA__b3791__JW3765	18.047
yehT__b2125__JW5352	yaaU__b0045__JW0044	18.0647
glpK__b3926__JW3897	ydcL__b1431__JW1427	18.2424
ymgF__b4520__JW1156	ybjP__b0865__JW0849	18.3877
mscS__b2924__JW2891	yjbF__b4027__JW5711	18.3909
folE__b2153__JW2140	yieG__b3714__JW3692	19.3087
pta__b2297__JW2294	ytfN__b4221__JW4180	19.3396
micC__b4427__UNKW3110	tolR__b0738__JW0728	19.3401
phoE__b0241__JW0231	yjdL__b4130__JW4091	19.4368
ggt__b3447__JW3412	pal__b0741__JW0731	19.5607
wzyE__b3793__JW3769	ydeT__b1505__JW1499	19.5748
ybiV__b0822__JW0806	sugE__b4148__JW5738	19.6403
glmU__b3730__JW3708	kdsD__b3197__JW3164	19.6956
yfgA__b2516__JW2500	alr__b4053__JW4013	19.9504
arcB__b3210__JW5536	caiE__b0035__JW5004	20.2771
ymgF__b4520__JW1156	lepA__b2569__JW2553	20.4474
paaJ__b1397__JW1392	ydjE__b1769__JW1758	21.0593
maoC__b1387__JW1382	yjbF__b4027__JW5711	21.1247
yiiU__b3928__JW3899	ydhP__b1657__JW1649	21.4605
arcB__b3210__JW5536	ydhP__b1657__JW1649	21.636
yfiO__b2595__JW2577	ycdQ__b1022__JW1007	21.9696
blr__b4409__JW5963	yncD__b1451__JW1446	22.2727
dicF__b1574__UNKW3110	ylbH__b0499__JW0488	22.6553
fadA__b3845__JW5578	murE__b0085__JW0083	22.7505
dicF__b1574__UNKW3110	trg__b1421__JW1417	22.8058
fliP__b1948__JW1932	yjeP__b4159__JW4120	23.7521
yfgA__b2516__JW2500	cusB__b0574__JW0563	26.764
dicF__b1574__UNKW3110	glpT__b2240__JW2234	27.2702
micC__b4427__UNKW3110	mraY__b0087__JW0085	28.2943
dicF__b1574__UNKW3110	macA__b0878__JW0862	28.9555
oppF__b1247__JW1239	kdsC__b3198__JW3165	29.9047
rybB__b4417__UNKW3110	ydeK__b1510__JW1503	32.7503
a Differential genetic interaction is calculated accoring to the follwiing formula: MM E-score - RM E-score
